# Supplementary material for: 1,3-Dipolar cycloaddition of azomethine ylides and imidoyl halides for synthesis of π-extended imidazolium salts
Source: Royal Society of Chemistry journal article supplement (doi:10.1039/d2qo00941b), 2022-01-01
Supplement: d2qo00941b1.pdf [file d2qo00941b1.pdf]

**Supporting Information for:**

# **1,3-Dipolar Cycloaddition of Azomethine Ylides and Imidoyl Halides for Synthesis of $\pi$ -Extended Imidazolium Salts**

Qiang-Qiang Li,<sup>a</sup> Yosuke Hamamoto,<sup>a</sup> Cheryl Cai Hui Tan,<sup>a</sup> Hiroyasu Sato,<sup>b</sup> Shingo Ito<sup>\*,a</sup>

<sup>a</sup> *Division of Chemistry and Biological Chemistry, School of Physical and Mathematical Sciences,  
Nanyang Technological University, 21 Nanyang Link, Singapore 637371, Singapore*

<sup>b</sup> *Rigaku Corporation, 3-9-12 Matsubara-Cho, Akishima, Tokyo 196-8666, Japan*

## **Table of Contents**

|                                |     |
|--------------------------------|-----|
| 1. Experimental Section        | S2  |
| 2. NMR Spectra                 | S11 |
| 3. Optical Properties          | S24 |
| 4. X-Ray Crystallographic Data | S25 |
| 5. Theoretical Calculations    | S29 |

## 1. Experimental Section

**General:** All reactions were carried out in a glove box or using standard Schlenk techniques under nitrogen atmosphere. Thin-layer chromatography (TLC) was performed using glass plates pre-coated with silica gel impregnated with a fluorescent indicator (Merck, #1.15685.0001). Silica gel column chromatography was performed as described by Still, et al.,<sup>1</sup> employing silica gel (Davisil, 60 Å, 40-63 micron) purchased from Sigma-Aldrich.

**Instrumentation:** NMR spectra were recorded on a Bruker AV 400 (<sup>1</sup>H: 400 MHz and <sup>13</sup>C: 100 MHz) NMR spectrometer. Chemical shift values for protons are referenced to the signal of tetramethylsilane ( $\delta$  0.00) or the residual signal of chloroform-*d* ( $\delta$  7.26). Chemical shift values for carbons are referenced to the signal of tetramethylsilane ( $\delta$  0.00) or the carbon resonance of chloroform-*d* ( $\delta$  77.2). High-resolution mass (HRMS) spectra were taken on a Waters Q-ToF Premier mass spectrometer with the electron spray ionization time-of-flight (ESI-TOF) method. Infrared (IR) spectra were recorded on a Shimadzu FTIR-8400 spectrometer with an attenuated total reflection (ATR) system. Ultraviolet-visible (UV-vis) absorption spectra were recorded on Shimadzu UV-1800 and UV-3100 spectrometers. Fluorescence spectra were recorded on a Cary Eclipse Spectrofluorometer. Melting temperatures and decomposition temperatures were recorded on an OptiMelt MPA-100 apparatus.

**Materials:** The following reagents were purchased from the indicated suppliers and used as received: cesium fluoride (CsF; Sigma), thionyl chloride (SOCl<sub>2</sub>; Sigma), cesium acetate (CsOAc; Sigma), cesium carbonate (Cs<sub>2</sub>CO<sub>3</sub>; Sigma), *N,N*-diisopropylethylamine (TCI), lithium fluoride (LiF; Alfa Aesar), sodium fluoride (NaF; Alfa Aesar), potassium fluoride (KF; Alfa Aesar), 15-crown-5 (Alfa), palladium(II) acetate (Sigma), di-*tert*-butyl(methyl)phosphonium tetrafluoroborate (Sigma), and 1,8-diazabicyclo[5.4.0]undec-7-ene (DBU, Sigma).

The following reagents were pre-dried over activated 4 Å molecular sieves and heated to reflux over calcium hydride under nitrogen atmosphere, collected by distillation and stored under argon in a Schlenk flask: 1,2-dichlorodichloroethane (DCE; Sigma), chlorobenzene (TCI) and dimethylacetamide (DMA).

The following reagents were prepared according to literature procedures: 2-*t*-butyl-8-hydroisoquinolino[4,3,2-*de*]phenanthridin-9-ium chloride<sup>2</sup> and imidoyl chlorides **2**.<sup>3</sup>

---

(1) W. C. Still, M. Kahn and A. Mitra, *J. Org. Chem.* 1978, **43**, 2923–2925.

(2) Y. Tokimaru, S. Ito and K. Nozaki, *Angew. Chem. Int. Ed.* 2018, **57**, 9818–9822.

(3) T. van Dijk, S. Burck, M. K. Rong, A. J. Rosenthal, M. Nieger, J. C. Slootweg and K. Lammertsma, *Angew. Chem. Int. Ed.* 2014, **53**, 9068–9071.



## A Procedure for Synthesizing Helicene Compounds **4**

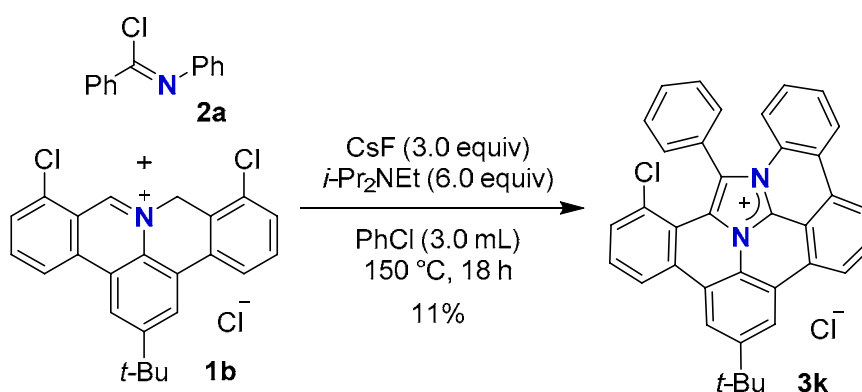

In the glovebox, imidoyl chloride **2** (0.20 mmol) and cesium fluoride (25.2 mg, 0.60 mmol) was placed in a 25-mL Schlenk tube. After being taken out from glove box, the Schlenk tube was connected to nitrogen line. To the mixture were added iminium salt **1b** (172 mg, 0.40 mmol), chlorobenzene (3.0 mL), and *N,N*-diisopropylethylamine (0.21 mL, 1.2 mmol). The reaction mixture was stirred for 18 hours at 150 °C (oil bath temperature). The reaction mixture was cooled to room temperature, diluted with dichloromethane (50 mL), washed with water 1 time and brine 3 times. After evaporation, the crude mixture was purified by silica gel column chromatography with dichloromethane : methanol (10:1) 3 times to obtain **3k** as brown solid (12.3 mg, 0.022 mmol, 11%).

### Control Experiment: Cycloaddition reaction under dark

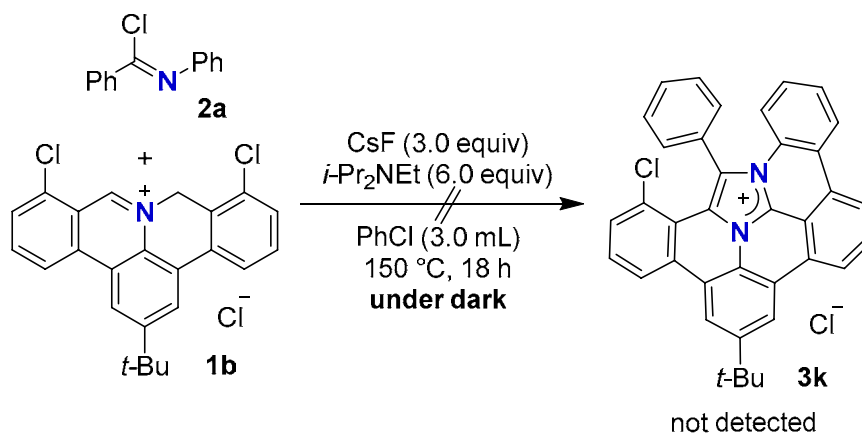

The same cycloaddition reaction was performed in the dark with the Schlenk tube covered with aluminum foil. As a result, compound **3k** was not detected in the NMR spectrum of the crude mixture, indicating that cyclization to form **3k** is accelerated by irradiation of ambient light.

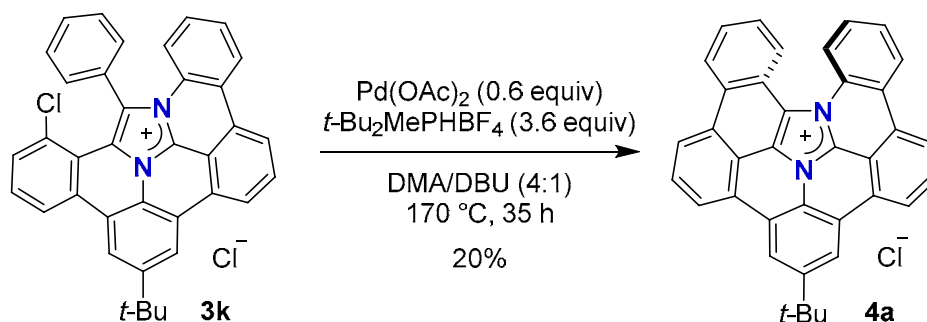

In the glovebox, imidazolium salt **3k** (9.8 mg, 17  $\mu\text{mol}$ ), palladium acetate (2.3 mg, 10  $\mu\text{mol}$ ), and di-*tert*-butyl(methyl)phosphonium tetrafluoroborate (15 mg, 62  $\mu\text{mol}$ ) were placed into a 25-mL Schlenk tube. After being taken out from glove box, the Schlenk tube was connected to a nitrogen line. To the mixture were added a mixture of dimethylacetamide and 1,8-diazabicyclo[5.4.0]undec-7-ene (DMA/DBU = 4/1; 2.0 mL). The reaction mixture was stirred at room temperature for 5 to 10 minutes, then stirred at 170 °C (oil bath temperature) for 35 hours. The reaction mixture was cooled to room temperature, diluted with ethyl acetate (25 mL) and toluene (25 mL), washed with water 1 time and brine 3 times. After evaporation, the crude mixture was purified by silica gel column chromatography with dichloromethane : methanol (10:1) to obtain **4a** as a colorless solid (1.8 mg, 3.4  $\mu\text{mol}$ , 20%).

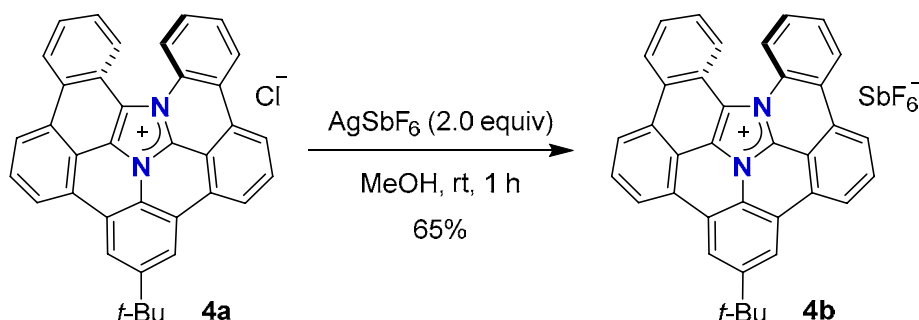

In a 25-mL Schlenk tube placed with imidazolium salt **4a** (6.0 mg, 11  $\mu\text{mol}$ ) and a magnetic stirring bar was added methanol (2.0 mL) to completely dissolve the solids. A solution of silver hexafluoroantimonate (7.8 mg, 22  $\mu\text{mol}$ ) in methanol (2.0 mL) was added dropwise into the above reaction mixture. After stirring at room temperature for 2 hour, the mixture was evaporated under vacuum. The crude residue was purified by silica gel column chromatography to yield **4b** as a white solid (5.3 mg, 7.2  $\mu\text{mol}$ , 65%).

### 8-*tert*-butyl-1,2-diphenyltribenzo[*b,g,ij*]imidazo[2,1,5-*de*]quinolizinium chloride (3a):

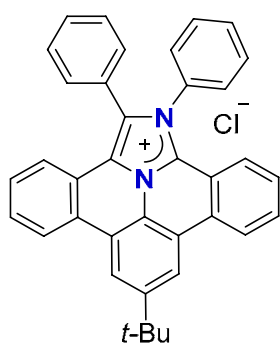

Colorless solid;  $R_f$ : 0.3 (dichloromethane : methanol = 10 : 1); mp >400 °C; IR (neat);  $\text{cm}^{-1}$  3048, 2952, 2907, 2864, 1977, 1728, 1574, 1534, 1505, 1442, 1416, 1391, 1277, 1255, 1182, 1035, 869, 811, 767, 738, 721, 702, 691;  $^1\text{H}$  NMR (400 MHz,  $\text{CDCl}_3$ , 300 K)  $\delta$  8.74 (d,  $J = 8.4$  Hz, 1H), 8.68 (d,  $J = 10.0$  Hz, 2H), 8.50 (d,  $J = 8.4$  Hz, 1H), 7.98–7.92 (m, 2H), 7.89 (t,  $J = 8.0$  Hz, 1H), 7.75 (d,  $J = 8.0$  Hz, 2H), 7.68 (t,  $J = 8.0$  Hz, 1H), 7.63–7.57 (m, 3H), 7.55–7.42 (m, 5H), 7.38 (t,  $J = 8.0$  Hz, 1H), 7.28 (d,  $J = 12.0$  Hz, 1H);  $^{13}\text{C}$  NMR (100 MHz,  $\text{CDCl}_3$ , 300 K)  $\delta$  151.6, 134.2, 132.3, 132.1 (2C), 131.6, 131.0, 130.9 (2C), 130.6 (2C), 130.3, 129.7, 129.6, 129.4 (2C), 129.0 (2C), 127.5, 127.3, 125.8, 124.8, 124.5, 124.2, 123.6 (2C), 123.5, 122.5, 121.9, 121.7, 120.5, 119.3, 117.2, 35.9, 31.7 (3C); HRMS (ESI)  $m/z$  calcd for  $\text{C}_{37}\text{H}_{29}\text{ClN}_2$   $[\text{M}-\text{Cl}]^+$  501.2331, found 501.2329.

### 8-*tert*-butyl-1-(4-methoxyphenyl)-2-phenyltribenzo[*b,g,ij*]imidazo[2,1,5-*de*]quinolizinium chloride (3b)

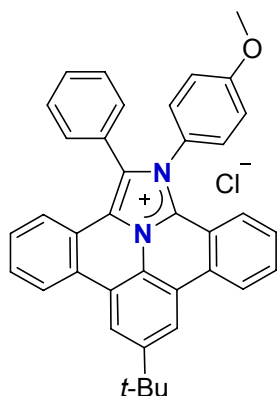

Colorless solid;  $R_f$ : 0.3 (dichloromethane:methanol = 10:1); mp 370-373 °C (decomp); IR (neat);  $\text{cm}^{-1}$  3048, 2957, 2907, 2869, 1608, 1585, 1572, 1514, 1461, 1441, 1414, 1364, 1303, 1249, 1180, 1030, 871, 848, 767, 746, 693;  $^1\text{H}$  NMR (400 MHz,  $\text{CDCl}_3$ , 300 K)  $\delta$  8.74 (d,  $J = 8.0$  Hz, 1H), 8.69 (d,  $J = 1.6$  Hz, 1H), 8.66 (d,  $J = 1.6$  Hz, 1H), 8.50 (d,  $J = 8.0$  Hz, 1H), 7.90 (t,  $J = 8.0$  Hz, 1H), 7.82 (d,  $J = 8.8$  Hz, 2H), 7.75–7.70 (m, 2H), 7.68 (t,  $J = 8.0$  Hz, 1H), 7.55–7.47 (m, 5H), 7.41–7.34 (m, 2H), 7.09 (d,  $J = 9.2$  Hz, 2H), 3.89 (s, 3H), 1.63 (s, 9H);  $^{13}\text{C}$  NMR (100 MHz,  $\text{CDCl}_3$ , 300 K)  $\delta$  161.5, 151.8, 132.5, 132.3, 131.9 (2C), 131.2, 131.1, 130.9, 130.8, 130.5, 129.9 (2C), 129.8 (2C), 129.6 (2C), 127.3, 126.1, 125.7, 124.6, 124.4, 124.2, 123.7, 123.4, 123.3, 122.4, 121.7, 121.4, 120.5, 119.3, 117.0, 115.9, 55.8, 35.9, 31.7 (3C); HRMS (ESI)  $m/z$  calcd for  $\text{C}_{38}\text{H}_{31}\text{ClN}_2\text{O}$   $[\text{M}-\text{Cl}]^+$  531.2436, found 531.2433.

### 1-([1,1'-biphenyl]-4-yl)-8-*tert*-butyl-2-phenyltribenzo[*b,g,ij*]imidazo[2,1,5-*de*]quinolizinium chloride (3c)

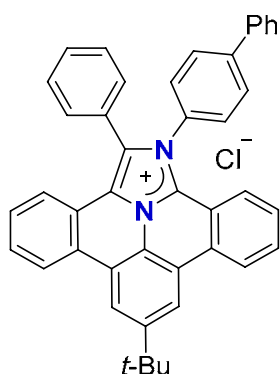

Colorless solid;  $R_f$ : 0.3 (dichloromethane:methanol = 10:1); mp >400 °C; IR (neat);  $\text{cm}^{-1}$  3053, 3032, 2962, 2907, 2867, 1608, 1571, 1532, 1489, 1442, 1417, 1391, 1361, 1314, 1278, 1253, 1180, 1074, 1032, 1009, 977, 863, 766, 740, 692;  $^1\text{H}$  NMR (400 MHz,  $\text{CDCl}_3$ , 300 K)  $\delta$  8.75 (d,  $J = 8.4$  Hz, 1H), 8.70 (s, 1H), 8.68 (s, 1H), 8.51 (d,  $J = 8.0$  Hz, 1H), 8.04 (d,  $J = 8.4$  Hz, 2H), 7.89 (t,  $J = 8.4$  Hz, 1H), 7.85–7.76 (m, 4H), 7.71–7.63 (m, 3H), 7.54–7.34 (m, 10H), 1.63 (s, 9H);  $^{13}\text{C}$  NMR (100 MHz,  $\text{CDCl}_3$ , 300 K)  $\delta$  151.6, 144.0, 138.8, 133.2, 132.4, 132.3, 132.1 (2C), 131.1, 131.0 (2C), 130.3, 129.7, 129.6, 129.5 (2C), 129.4 (2C), 129.1 (2C), 128.9 (2C), 128.6, 127.5, 127.2 (2C), 125.9, 124.8, 124.6, 124.2, 123.6 (2C), 123.5, 122.5, 121.9, 121.7, 120.5, 119.3, 117.2, 35.9, 31.7 (3C); HRMS (ESI)  $m/z$  calcd for  $\text{C}_{43}\text{H}_{33}\text{ClN}_2$   $[\text{M}-\text{Cl}]^+$  577.2644, found 577.2643.

**8-tert-butyl-1-(4-butylphenyl)-2-phenyltribenzo[*b,g,ij*]imidazo[2,1,5-*de*]quinolizinium chloride (3d)**

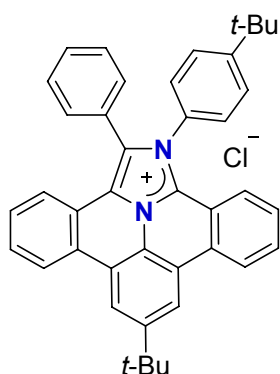

Colorless solid;  $R_f$ : 0.3 (dichloromethane:methanol = 10:1); mp 360–363 °C (decomp); IR (neat);  $\text{cm}^{-1}$  3053, 3030, 2960, 2907, 2867, 1575, 1532, 1516, 1462, 1414, 1364, 1314, 1276, 1253, 1203, 1107, 1030, 871, 859, 781, 767, 744, 718, 691;  $^1\text{H}$  NMR (400 MHz,  $\text{CDCl}_3$ , 300 K)  $\delta$  8.75 (d,  $J = 8.4$  Hz, 1H), 8.71 (s, 1H), 8.67 (s, 1H), 8.51 (d,  $J = 8.4$  Hz, 1H), 7.91 (t,  $J = 7.2$  Hz, 1H), 7.78 (d,  $J = 8.4$  Hz, 2H), 7.74–7.64 (m, 3H), 7.58 (d,  $J = 8.4$  Hz, 2H), 7.55–7.42 (m, 5H), 7.39 (t,  $J = 7.6$  Hz, 1H), 7.28 (d,  $J = 10.4$  Hz, 1H);  $^{13}\text{C}$  NMR (100 MHz,  $\text{CDCl}_3$ , 300 K)  $\delta$  155.3, 151.8, 132.5, 132.2, 131.9 (2C), 131.2, 131.0 (2C), 130.9, 130.5, 129.8, 129.7, 129.5 (2C), 128.2 (2C), 127.6 (2C), 127.4 (2C), 125.7, 124.7, 124.5, 124.2, 123.7, 123.5, 123.4, 122.5, 121.7, 121.6, 120.5, 119.4, 117.0, 35.9, 35.1, 31.7 (3C), 31.2 (3C); HRMS (ESI)  $m/z$  calcd for  $\text{C}_{41}\text{H}_{37}\text{ClN}_2$   $[\text{M}-\text{Cl}]^+$  557.2957, found 557.2953.

**8-tert-butyl-2-phenyl-1-(4-(trifluoromethyl)phenyl)tribenzo[*b,g,ij*]imidazo[2,1,5-*de*]quinolizinium chloride (3e)**

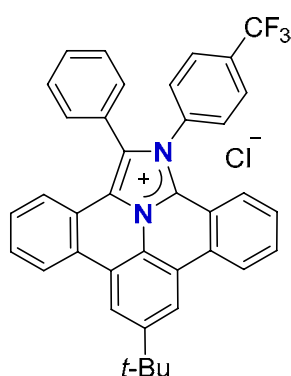

Colorless solid;  $R_f$ : 0.3 (dichloromethane:methanol = 10:1); mp >400 °C; IR (neat);  $\text{cm}^{-1}$  3055, 2960, 2907, 2872, 1618, 1572, 1535, 1505, 1442, 1394, 1322, 1253, 1166, 1126, 1069, 1027, 979, 869, 801, 767, 690;  $^1\text{H}$  NMR (400 MHz,  $\text{CDCl}_3$ , 300 K)  $\delta$  8.73 (d,  $J = 8.0$  Hz, 1H), 8.68 (s, 1H), 8.66 (s, 1H), 8.48 (d,  $J = 8.0$  Hz, 1H), 8.41 (d,  $J = 8.4$  Hz, 2H), 7.90–7.78 (m, 5H), 7.66 (t,  $J = 7.6$  Hz, 1H), 7.54–7.43 (m, 5H), 7.36 (t,  $J = 7.6$  Hz, 1H), 7.25 (d,  $J = 8.8$  Hz, 1H), 1.63 (s, 9H);  $^{13}\text{C}$  NMR (100 MHz,  $\text{CDCl}_3$ , 300 K)  $\delta$  151.5, 137.8, 133.5, 133.2, 132.5, 132.2 (2C), 132.1, 131.1 (2C), 130.8, 130.3 (2C), 130.2, 129.6, 129.5 (3C), 127.6, 127.5, 127.4, 125.8, 124.9, 124.6, 124.3, 124.2, 123.7, 123.6, 123.5, 123.1 (q,  $J = 103.0$  Hz, 1C), 122.6, 122.0, 120.5, 119.2, 35.9, 31.7 (3C); HRMS (ESI)  $m/z$  calcd for  $\text{C}_{38}\text{H}_{28}\text{ClF}_3\text{N}_2$   $[\text{M}-\text{Cl}]^+$  569.2205, found 569.2201.

**8-tert-butyl-1-(4-chlorophenyl)-2-phenyltribenzo[*b,g,ij*]imidazo[2,1,5-*de*]quinolizinium chloride (3f)**

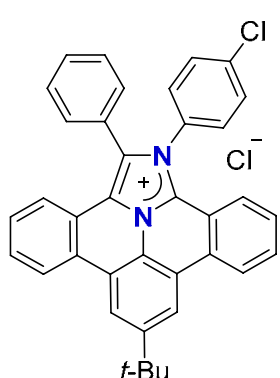

Colorless solid;  $R_f$ : 0.3 (dichloromethane:methanol = 10:1); mp >400 °C; IR (neat);  $\text{cm}^{-1}$  3050, 3025, 3007, 2962, 2907, 2869, 1572, 1532, 1497, 1442, 1417, 1361, 1278, 1253, 1183, 1090, 1025, 977, 871, 854, 796, 766, 739, 705, 691;  $^1\text{H}$  NMR (400 MHz,  $\text{CDCl}_3$ , 300 K)  $\delta$  8.72 (d,  $J = 8.4$  Hz, 1H), 8.68 (s, 1H), 8.65 (s, 1H), 8.48 (d,  $J = 8.0$  Hz, 1H), 8.11 (d,  $J = 8.4$  Hz, 2H), 7.87 (t,  $J = 7.6$  Hz, 1H), 7.81 (d,  $J = 6.0$  Hz, 2H), 7.65 (t,  $J = 7.6$  Hz, 1H), 7.60–7.46 (m, 7H), 7.36 (t,  $J = 7.6$  Hz, 2H) 1.62 (s, 9H);  $^{13}\text{C}$  NMR (100 MHz,  $\text{CDCl}_3$ , 300 K)  $\delta$  151.4, 137.6, 133.0, 132.5, 132.2 (3C), 131.0 (2C), 130.9, 130.7 (4C), 130.2, 129.6, 129.5 (3C), 127.5, 125.8, 124.8, 124.4, 124.2, 123.6, 123.5 (2C), 122.5, 122.0, 121.8, 120.5, 119.2, 117.3, 35.9, 31.7 (3C); HRMS (ESI)  $m/z$  calcd for  $\text{C}_{37}\text{H}_{28}\text{Cl}_2\text{N}_2$   $[\text{M}-\text{Cl}]^+$  535.1941, found 535.1937.

**8-*tert*-butyl-2-phenyl-1-(2-methylphenyl)tribenzo[*b,g,ij*]imidazo[2,1,5-*de*]quinolizinium chloride (3g)**

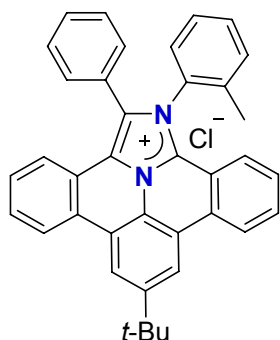

Colorless solid;  $R_f$ : 0.3 (dichloromethane:methanol = 10:1); mp 355–358 °C (decomp); IR (neat);  $\text{cm}^{-1}$  3040, 2952, 2902, 2864, 1632, 1572, 1532, 1502, 1464, 1441, 1415, 1383, 1363, 1272, 1250, 1032, 932, 869, 781, 767, 739, 726, 693;  $^1\text{H}$  NMR (400 MHz,  $\text{CDCl}_3$ , 300 K)  $\delta$  8.80 (d,  $J = 8.4$  Hz, 1H), 8.74 (s, 1H), 8.71 (s, 1H), 8.54 (d,  $J = 8.4$  Hz, 1H), 8.11 (d,  $J = 7.6$  Hz, 1H), 7.96 (t,  $J = 7.6$  Hz, 1H), 7.93–7.87 (m, 1H), 7.72 (t,  $J = 7.6$  Hz, 1H), 7.59–7.37 (m, 10H), 7.21 (d,  $J = 8.4$  Hz, 1H), 2.06 (s, 3H), 1.64 (s, 9H);  $^{13}\text{C}$  NMR (100 MHz,  $\text{CDCl}_3$ , 300 K)  $\delta$  152.0, 134.9, 133.0, 132.9, 132.8, 132.1, 131.8, 131.7, 131.3, 130.9, 130.6, 130.2 (2C), 130.0 (2C), 129.9 (2C), 129.3, 128.8, 127.5, 125.4, 124.7, 124.4, 123.8, 123.6, 123.5, 123.4, 122.5, 121.9, 121.7, 120.7, 119.5, 116.9, 36.0, 31.7 (3C), 17.7; HRMS (ESI)  $m/z$  calcd for  $\text{C}_{38}\text{H}_{31}\text{ClN}_2$   $[\text{M}-\text{Cl}]^+$  515.2487, found 515.2474.

**8-*tert*-butyl-2-phenyl-1-(pyridin-3-yl)tribenzo[*b,g,ij*]imidazo[2,1,5-*de*]quinolizinium chloride (3h)**

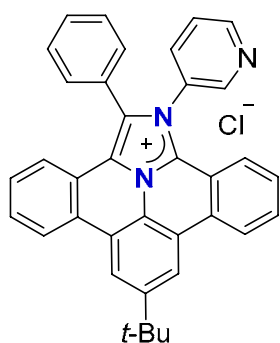

Colorless solid;  $R_f$ : 0.3 (dichloromethane:methanol = 10:1); mp >400 °C; IR (neat);  $\text{cm}^{-1}$  3008, 2962, 2930, 2894, 2874, 1637, 1586, 1574, 1532, 1494, 1476, 1443, 1417, 1375, 1312, 1202, 1167, 1086, 1058, 1040, 1030, 978, 932, 859, 844, 830, 767, 733, 700;  $^1\text{H}$  NMR (400 MHz,  $\text{CDCl}_3$ , 300 K)  $\delta$  9.45 (d,  $J = 7.6$  Hz, 1H), 8.79 (d,  $J = 4.4$  Hz, 1H), 8.76–8.71 (m, 2H), 8.68 (d,  $J = 8.4$  Hz, 2H), 8.49 (d,  $J = 8.4$  Hz, 1H), 8.30–8.18 (m, 1H), 7.88 (t,  $J = 7.6$  Hz, 1H), 7.75–7.60 (m, 2H), 7.58–7.40 (m, 6H), 7.37 (t,  $J = 7.6$  Hz, 1H), 7.30 (d,  $J = 8.4$  Hz, 1H), 1.63 (s, 9H);  $^{13}\text{C}$  NMR (100 MHz,  $\text{CDCl}_3$ , 300 K)  $\delta$  152.3, 151.5, 148.2, 139.3, 133.5, 132.9, 132.3, 132.2, 131.1 (2C), 130.9, 130.2, 130.1, 129.6 (2C), 129.1, 127.5, 125.6, 125.5, 125.0, 124.9, 124.3 (2C), 123.7, 123.5 (2C), 122.6, 122.0, 121.9, 120.5, 119.3, 117.3, 35.9, 31.7 (3C); HRMS (ESI)  $m/z$  calcd for  $\text{C}_{36}\text{H}_{28}\text{ClN}_3$   $[\text{M}-\text{Cl}]^+$  502.2283, found 502.2276.

**8-(*tert*-butyl)-1-phenyl-2-(thiophen-2-yl)tribenzo[*b,g,ij*]imidazo[2,1,5-*de*]quinolizinium chloride (3i):**

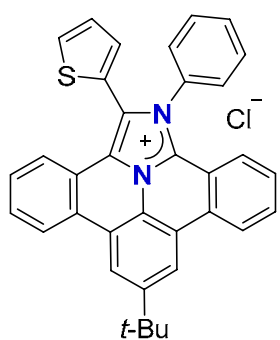

Colorless solid;  $R_f$ : 0.3 (dichloromethane:methanol = 10:1); mp >400 °C; IR (neat);  $\text{cm}^{-1}$  3032, 3005, 2955, 2904, 2869, 1635, 1597, 1575, 1535, 1505, 1459, 1442, 1415, 1395, 1364, 1316, 1273, 1253, 1223, 1175, 1080, 1037, 949, 874, 849, 798, 768, 742, 714, 692;  $^1\text{H}$  NMR (400 MHz,  $\text{CDCl}_3$ , 300 K)  $\delta$  8.76 (d,  $J = 8.0$  Hz, 1H), 8.71 (s, 1H), 8.69 (s, 1H), 8.53 (d,  $J = 8.0$  Hz, 1H), 8.00–7.85 (m, 3H), 7.80–7.60 (m, 7H), 7.48 (t,  $J = 7.6$  Hz, 2H), 7.29 (d,  $J = 8.0$  Hz, 1H), 7.18 (dd,  $J = 4.0, 5.2$  Hz, 1H), 1.63 (s, 9H);  $^{13}\text{C}$  NMR (100 MHz,  $\text{CDCl}_3$ , 300 K)  $\delta$  151.9, 135.3, 133.9, 132.9, 132.7, 131.8, 131.6, 131.0, 130.8, 130.7 (2C), 129.9, 129.7, 128.8 (2C), 128.6 (2C), 127.7, 125.1, 124.6, 124.3, 124.1, 123.9, 123.6, 123.5, 123.3, 122.4, 121.5, 120.6, 119.5, 116.9, 35.9, 31.7 (3C); HRMS (ESI)  $m/z$  calcd for  $\text{C}_{35}\text{H}_{27}\text{ClN}_2\text{S}$   $[\text{M}-\text{Cl}]^+$  507.1895, found 507.1890.



**8-tert-butyl-2-(furan-2-yl)-1-phenyltribenzo[*b,g,ij*]imidazo[2,1,5-*de*]quinolizinium chloride (3j)**

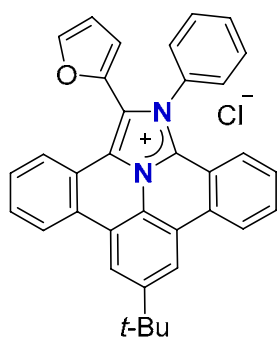

Colorless solid;  $R_f$ : 0.3 (dichloromethane:methanol = 10:1); mp 340–343 °C (decomp); IR (neat);  $\text{cm}^{-1}$  3040, 3000, 2947, 2902, 2864, 1979, 1635, 1605, 1580, 1533, 1506, 1442, 1415, 1389, 1364, 1316, 1278, 1256, 1218, 1180, 1160, 1145, 1072, 1009, 984, 906, 889, 872, 844, 801, 767, 746, 693;  $^1\text{H}$  NMR (400 MHz,  $\text{CDCl}_3$ , 300 K)  $\delta$  8.77 (d,  $J = 8.4$  Hz, 1H), 8.73 (s, 1H), 8.71 (s, 1H), 8.56 (d,  $J = 8.0$  Hz, 1H), 7.98–7.89 (m, 3H), 7.79 (t,  $J = 7.6$  Hz, 1H), 7.76–7.62 (m, 5H), 7.56 (t,  $J = 7.6$  Hz, 1H), 7.50 (t,  $J = 7.6$  Hz, 1H), 7.32 (d,  $J = 8.4$  Hz, 1H), 7.07 (d,  $J = 3.2$  Hz, 1H), 8.56 (dd,  $J = 2.0, 3.6$  Hz, 1H), 1.64 (s, 9H);  $^{13}\text{C}$  NMR (100 MHz,  $\text{CDCl}_3$ , 300 K)  $\delta$  152.1, 145.9, 137.2, 134.0, 133.1, 133.0, 132.1, 131.2, 131.1, 130.9 (2C), 130.1, 129.9, 128.5 (2C), 127.8, 125.2, 124.7, 124.4 (2C), 123.7, 123.4, 123.2, 122.4, 121.1, 120.9, 120.8, 119.6, 118.8, 116.8, 112.4, 36.0, 31.7 (3C); HRMS (ESI)  $m/z$  calcd for  $\text{C}_{35}\text{H}_{27}\text{ClN}_2\text{O}$   $[\text{M}-\text{Cl}]^+$  491.2123, found 491.2117.

**9-tert-butyl-14-chloro-15-phenyl-14b<sup>1</sup>,15a-diazadibenzo[*fg,ij*]cyclopenta[*rst*]pentaphenium chloride (3k)**

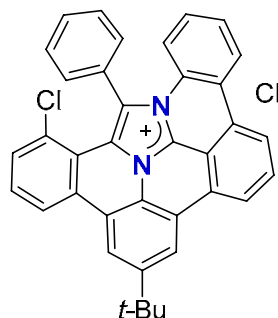

Brown solid;  $R_f$ : 0.3 (dichloromethane:methanol = 10:1); mp 360–365 °C (decomp); IR (neat);  $\text{cm}^{-1}$  2960, 2907, 2864, 1650, 1591, 1577, 1532, 1459, 1443, 1406, 1392, 1363, 1250, 1030, 920, 877, 802, 760, 722, 696;  $^1\text{H}$  NMR (400 MHz,  $\text{CDCl}_3$ , 300 K)  $\delta$  8.93 (d,  $J = 8.0$  Hz, 2H), 8.89 (d,  $J = 7.7$  Hz, 1H), 8.82 (s, 1H), 8.65 (s, 1H), 8.58 (d,  $J = 7.9$  Hz, 1H), 8.53 (t,  $J = 8.0$  Hz, 1H), 7.89 (d,  $J = 7.0$  Hz, 2H), 7.84–7.69 (m, 5H), 7.56 (d,  $J = 7.8$  Hz, 1H), 7.43 (t,  $J = 7.9$  Hz, 1H), 7.38 (d,  $J = 8.2$  Hz, 1H), 1.65 (s, 9H);  $^{13}\text{C}$  NMR (100 MHz,  $\text{CDCl}_3$ , 300 K)  $\delta$  152.5, 134.7, 133.3, 132.8, 132.1 (2C), 131.9 (2C), 131.6, 131.2, 130.6, 130.5, 130.1, 129.7, 129.3, 128.8, 128.5, 128.3, 126.3, 124.1, 123.4, 123.0 (2C), 122.8, 122.7, 122.3, 122.1, 121.4, 121.3 (2C), 120.8, 119.0, 111.9, 36.1, 31.7 (3C); HRMS (ESI)  $m/z$  calcd for  $\text{C}_{37}\text{H}_{26}\text{Cl}_2\text{N}_2$   $[\text{M}-\text{Cl}]^+$  533.1785, found 533.1787.

**9-tert-butyl-7b<sup>2</sup>,17b-diazadibenzo[*fg,ij*]benzo[6,7]indeno[5,4,3,2,1-*pqrst*]pentaphenium chloride (4a)**

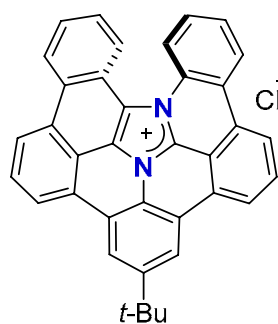

Colorless solid;  $R_f$ : 0.3 (dichloromethane:methanol = 10:1); mp 320–325 °C (decomp); IR (neat);  $\text{cm}^{-1}$  2957, 2921, 2851, 1660, 1632, 1595, 1466, 1454, 1391, 1260, 1096, 1021, 884, 815, 757, 699;  $^1\text{H}$  NMR (400 MHz,  $\text{CD}_3\text{OD}$ , 300 K)  $\delta$  9.02–8.87 (m, 4H), 8.83 (s, 1H), 8.79 (d,  $J = 8.0$  Hz, 2H), 8.74 (s, 1H), 8.64 (d,  $J = 8.8$  Hz, 1H), 8.56 (d,  $J = 7.6$  Hz, 1H), 8.47 (t,  $J = 8.0$  Hz, 1H), 8.09 (t,  $J = 7.6$  Hz, 1H), 8.05–7.95 (m, 2H), 7.85 (t,  $J = 7.6$  Hz, 1H), 7.79 (t,  $J = 7.6$  Hz, 1H), 1.71 (s, 9H);  $^{13}\text{C}$  NMR (100 MHz,  $\text{CD}_3\text{OD}$ , 300 K)  $\delta$  153.4, 135.2, 134.6, 132.1, 131.0, 130.7, 130.5, 129.8, 129.7, 129.6, 129.5, 128.7, 128.5, 127.8, 126.5, 125.7, 125.5, 123.8 (2C), 123.6, 123.1, 123.0, 122.3 (2C), 122.2 (2C), 122.1, 121.8, 121.7, 121.1, 120.3, 119.7 (2C), 111.9, 36.0, 30.9 (3C); HRMS (ESI)  $m/z$  calcd for  $\text{C}_{37}\text{H}_{25}\text{ClN}_2$   $[\text{M}-\text{Cl}]^+$  497.2018, found 497.2021.

**9-tert-butyl-7b<sup>2</sup>,17b-diazadibenzo[fg,ij]benzo[6,7]indeno[5,4,3,2,1-pqrst]pentaphenium hexafluoroantimonate (4b)**

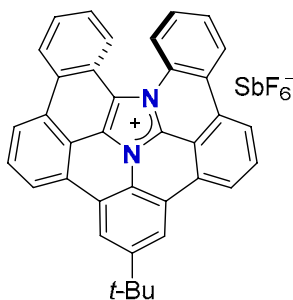

Colorless solid;  $R_f$ : 0.3 (dichloromethane:methanol = 10:1); mp 376–380 °C (decomp); IR (neat);  $\text{cm}^{-1}$  2958, 2917, 2871, 1661, 1607, 1595, 1576, 1543, 1454, 1390, 1366, 1325, 1248, 1164, 1119, 1056, 969, 882, 815, 756, 650;  $^1\text{H}$  NMR (400 MHz,  $\text{CD}_3\text{CN}$ , 300 K)  $\delta$  8.78 (d,  $J = 8.2$  Hz, 1H), 8.76 (d,  $J = 8.0$  Hz, 1H), 8.71 (d,  $J = 8.0$  Hz, 1H), 8.62 (s, 1H), 8.56 (d,  $J = 8.3$  Hz, 1H), 8.47 (s, 1H) 8.45 (d,  $J = 8.4$  Hz, 1H), 8.36 (t,  $J = 7.6$  Hz, 1H), 8.35 (d,  $J = 7.5$  Hz, 1H), 8.24 (d,  $J = 7.8$  Hz, 1H), 8.21 (d,  $J = 8.3$  Hz, 1H), 7.98–7.88 (m, 2H), 7.71 (t,  $J = 7.9$  Hz, 1H) 7.59 (t,  $J = 7.4$  Hz, 1H), 7.53 (t,  $J = 7.5$  Hz, 1H), 1.66 (s, 9H);  $^{13}\text{C}$  NMR (100 MHz,  $\text{CD}_3\text{CN}$ , 300 K)  $\delta$  154.3, 135.6, 132.7, 132.0, 131.4, 131.1, 130.5, 130.2, 130.1, 130.0, 129.8, 129.7, 128.9, 127.5, 126.3 (2C), 124.9 (2C), 124.4, 123.8, 123.7, 123.5 (2C), 123.4, 122.9, 122.4, 122.3, 122.2, 120.8, 120.7, 120.4, 115.3, 112.6, 37.1, 31.9 (3C); HRMS (ESI)  $m/z$  calcd for  $[\text{M}-\text{SbF}_6]^+$  497.2018, found 497.2026.

## 2. NMR Spectra

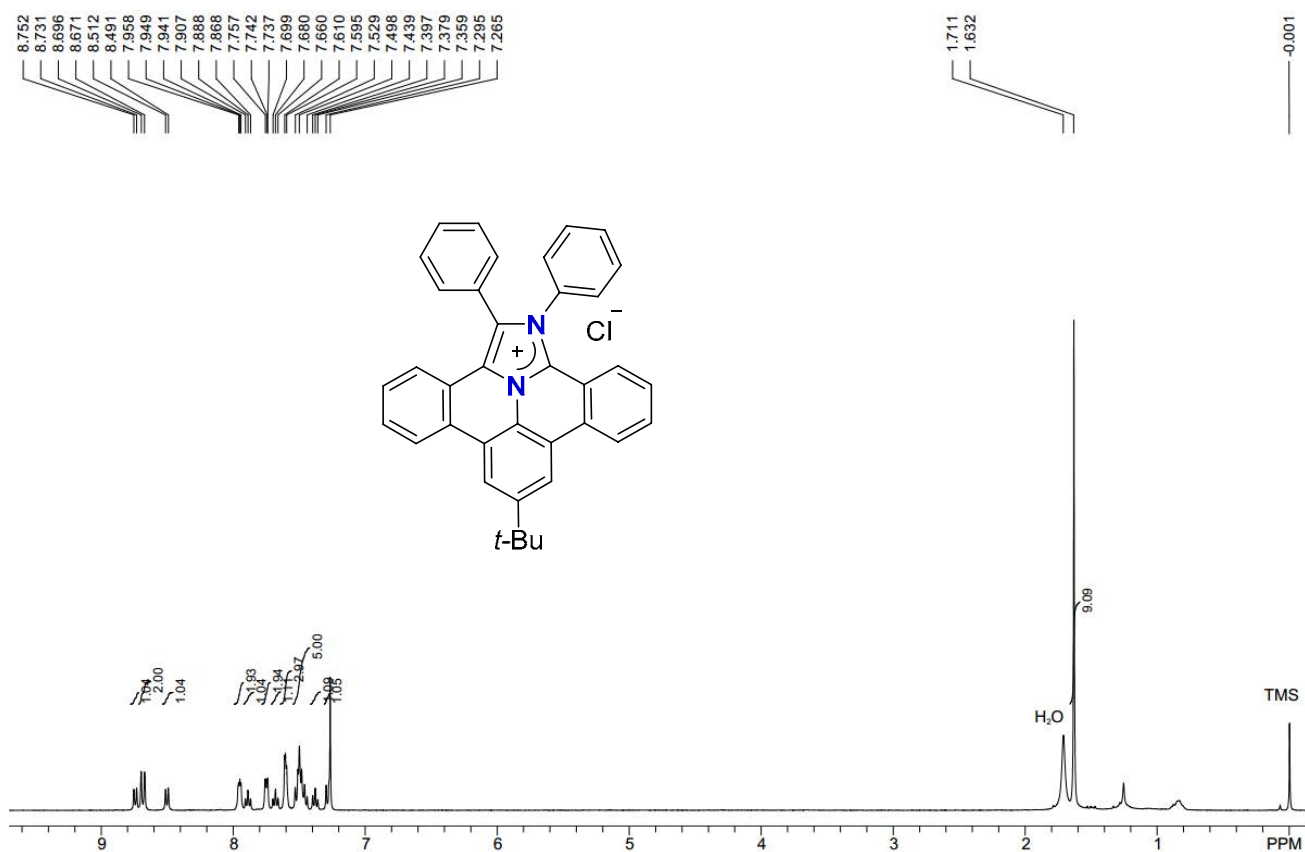

Figure S1. <sup>1</sup>H NMR spectrum of **3a** (400 MHz, CDCl<sub>3</sub>, 300 K).

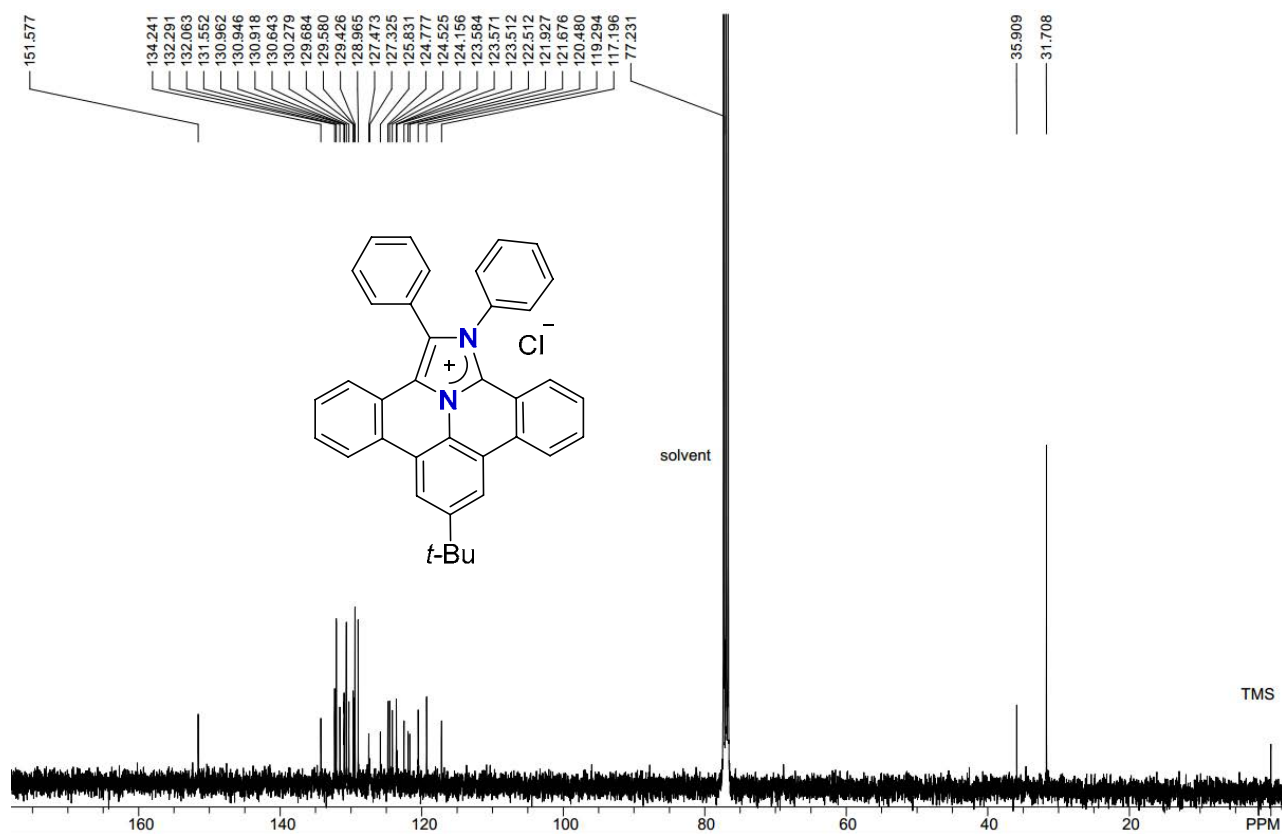

Figure S2. <sup>13</sup>C NMR spectrum of **3a** (100 MHz, CDCl<sub>3</sub>, 300 K).

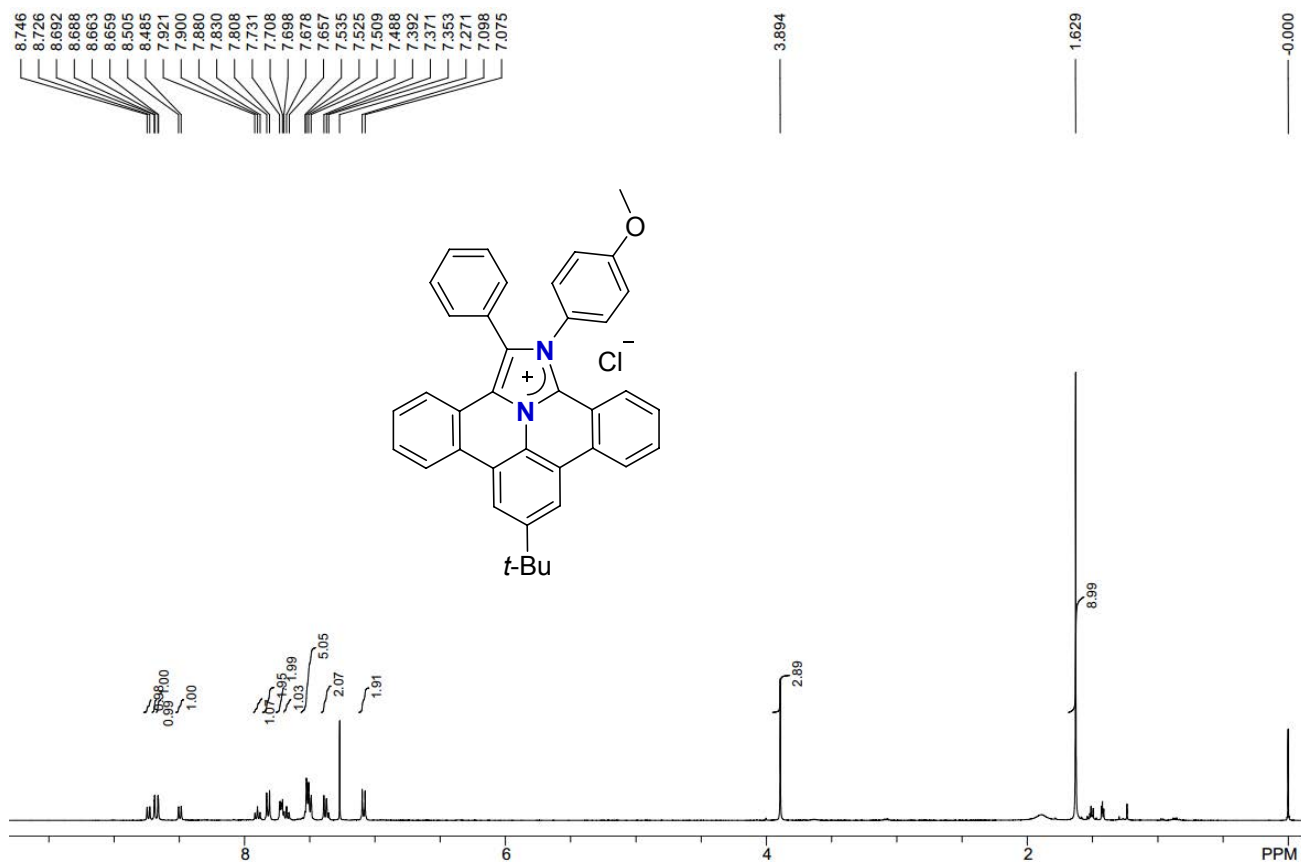

**Figure S3.** <sup>1</sup>H NMR spectrum of **3b** (400 MHz, CDCl<sub>3</sub>, 300 K).

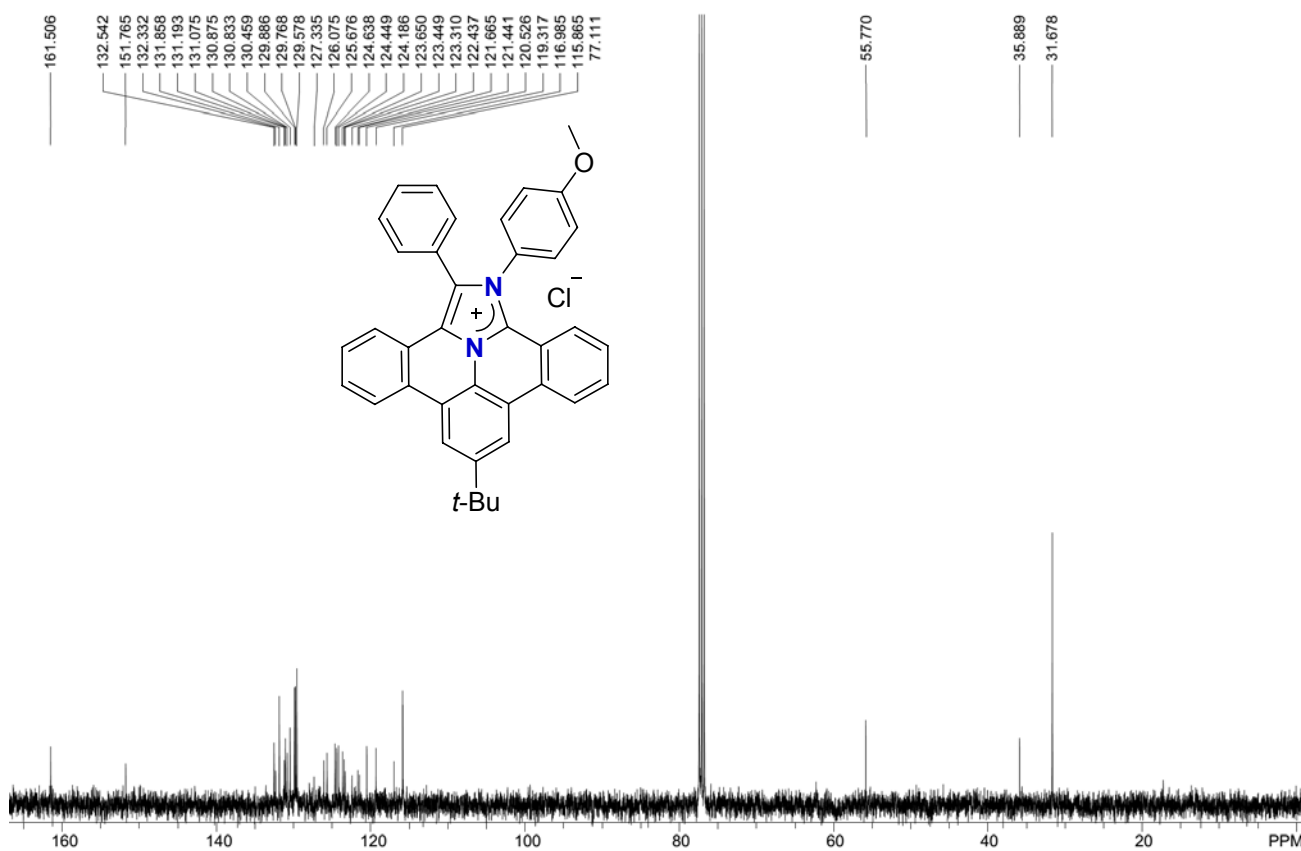

**Figure S4.** <sup>13</sup>C NMR spectrum of **3b** (100 MHz, CDCl<sub>3</sub>, 300 K).

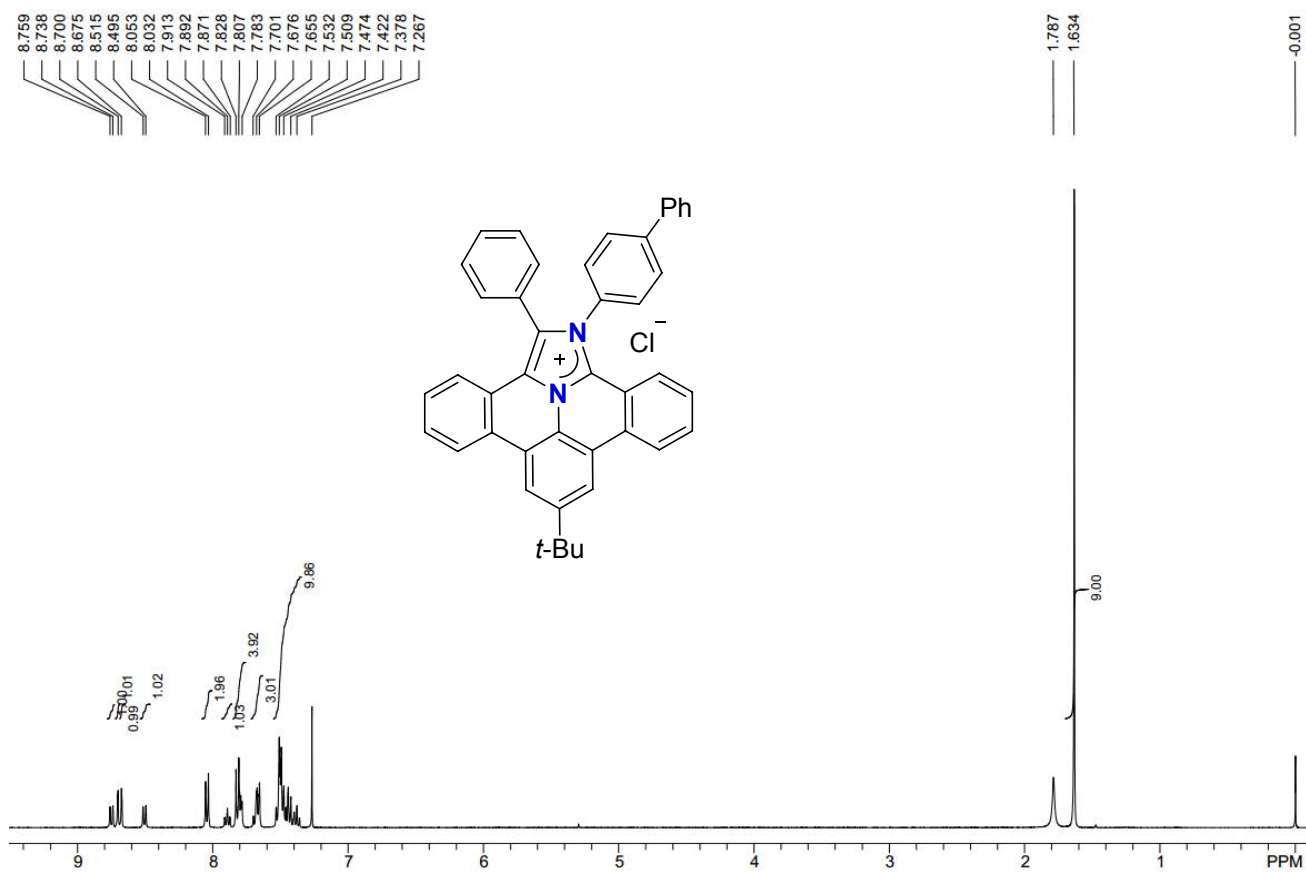

**Figure S5.** <sup>1</sup>H NMR spectrum of **3c** (400 MHz, CDCl<sub>3</sub>, 300 K).

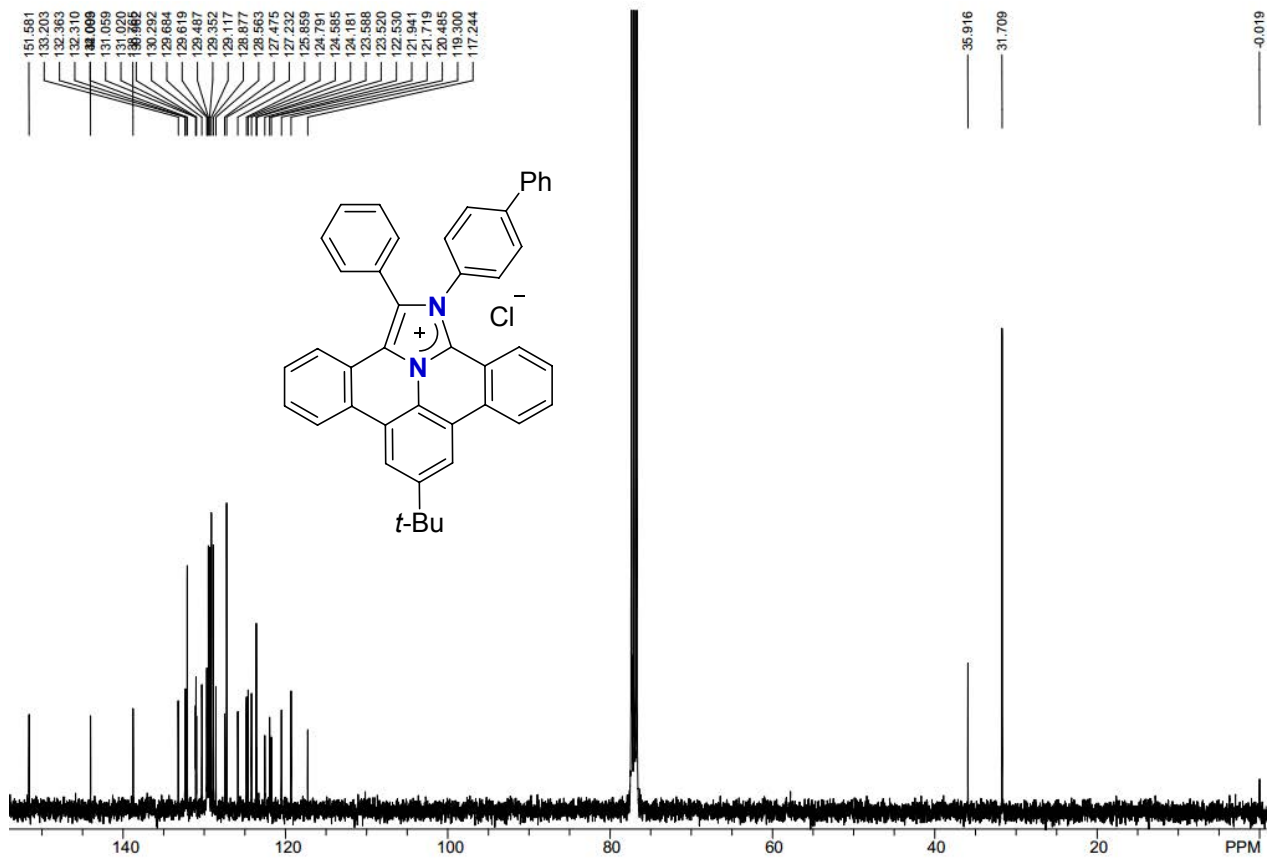

**Figure S6.** <sup>13</sup>C NMR spectrum of **3c** (100 MHz, CDCl<sub>3</sub>, 300 K).



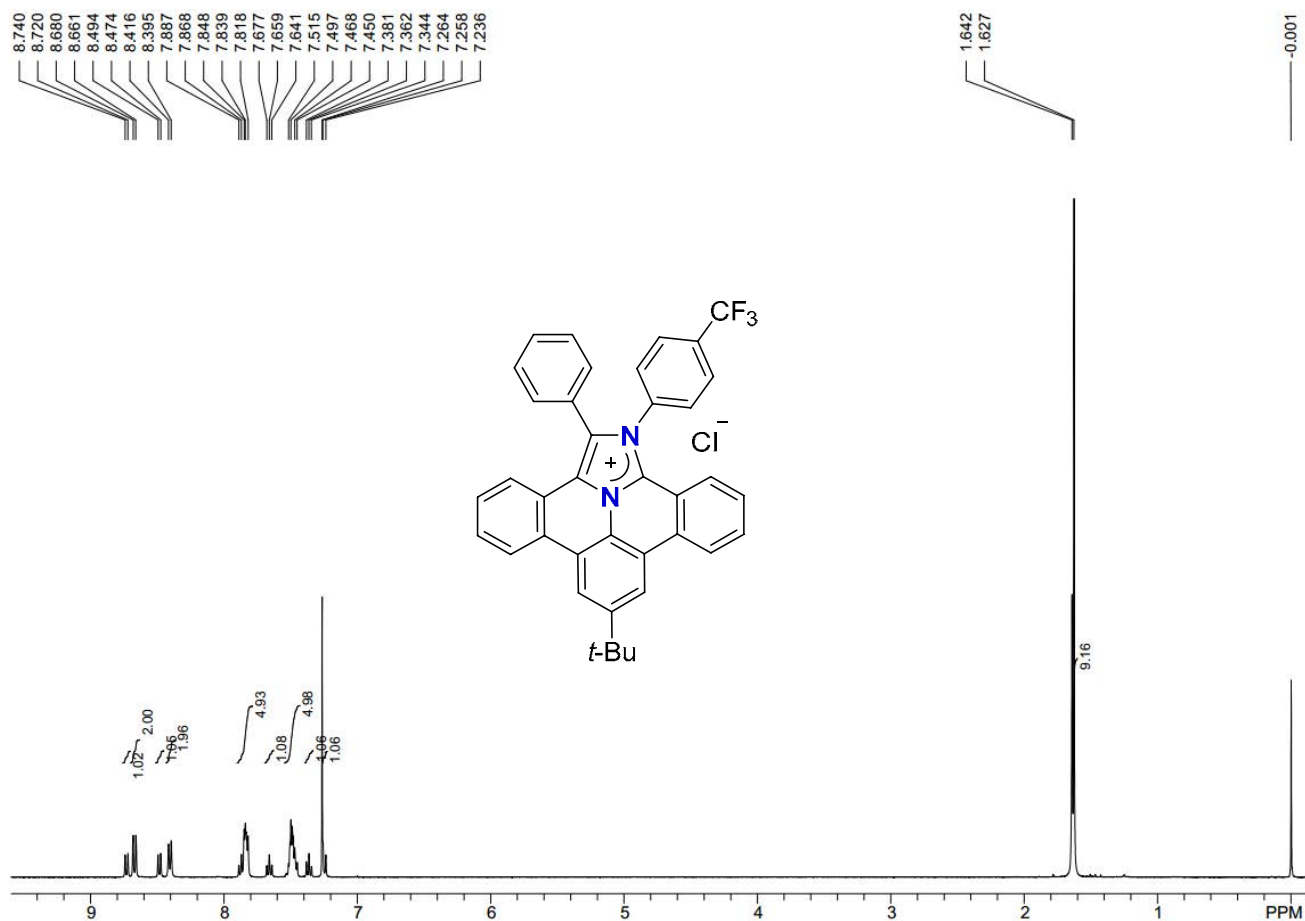

**Figure S9.** <sup>1</sup>H NMR spectrum of **3e** (400 MHz, CDCl<sub>3</sub>, 300 K).

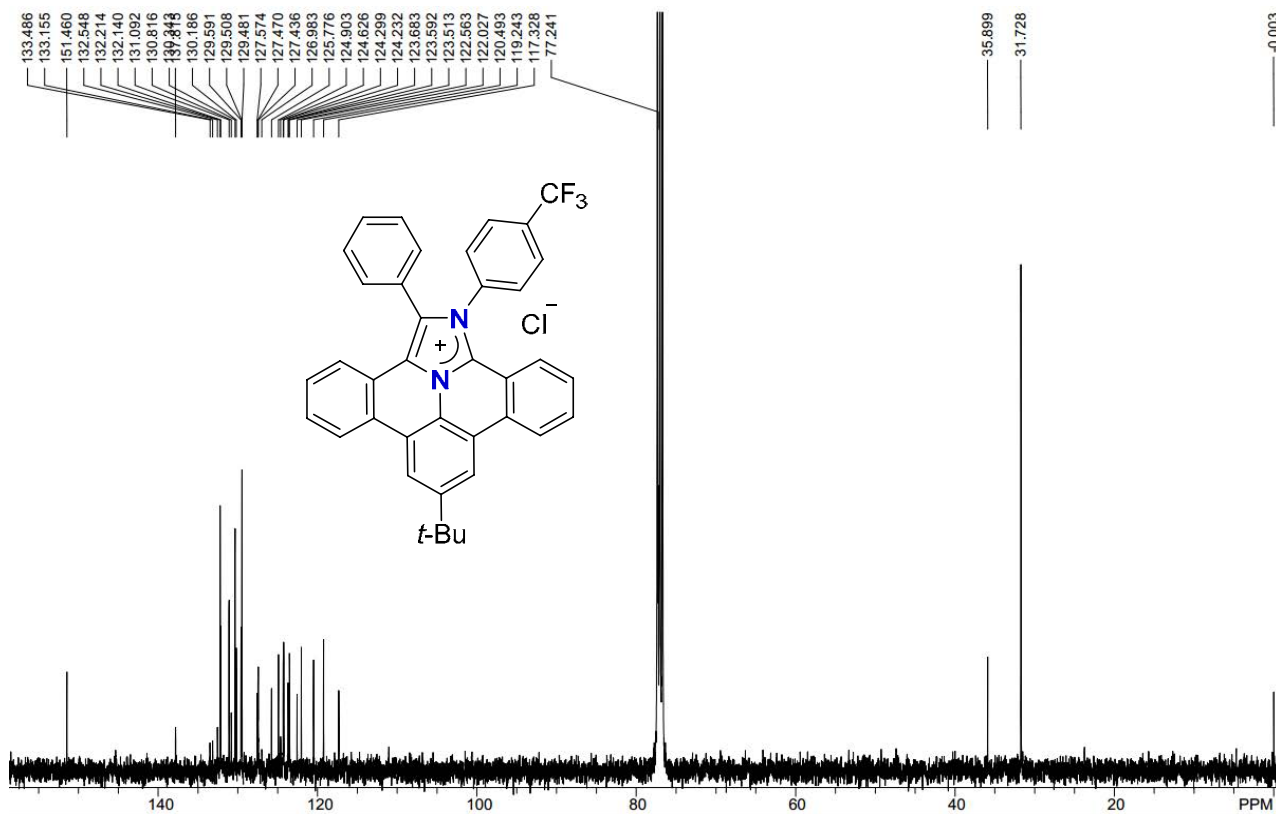

**Figure S10.** <sup>13</sup>C NMR spectrum of **3e** (100 MHz, CDCl<sub>3</sub>, 300 K).

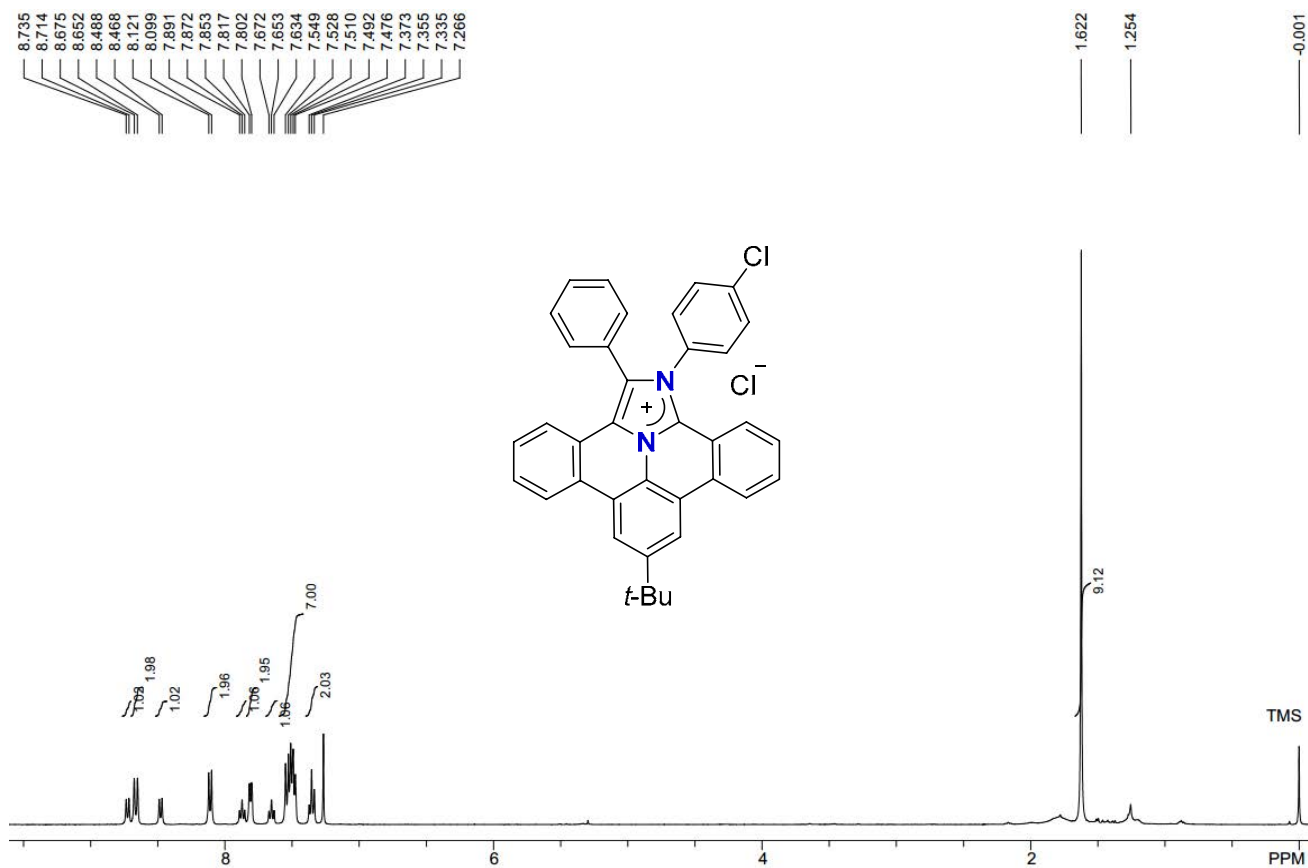

**Figure S11.** <sup>1</sup>H NMR spectrum of **3f** (400 MHz, CDCl<sub>3</sub>, 300 K).

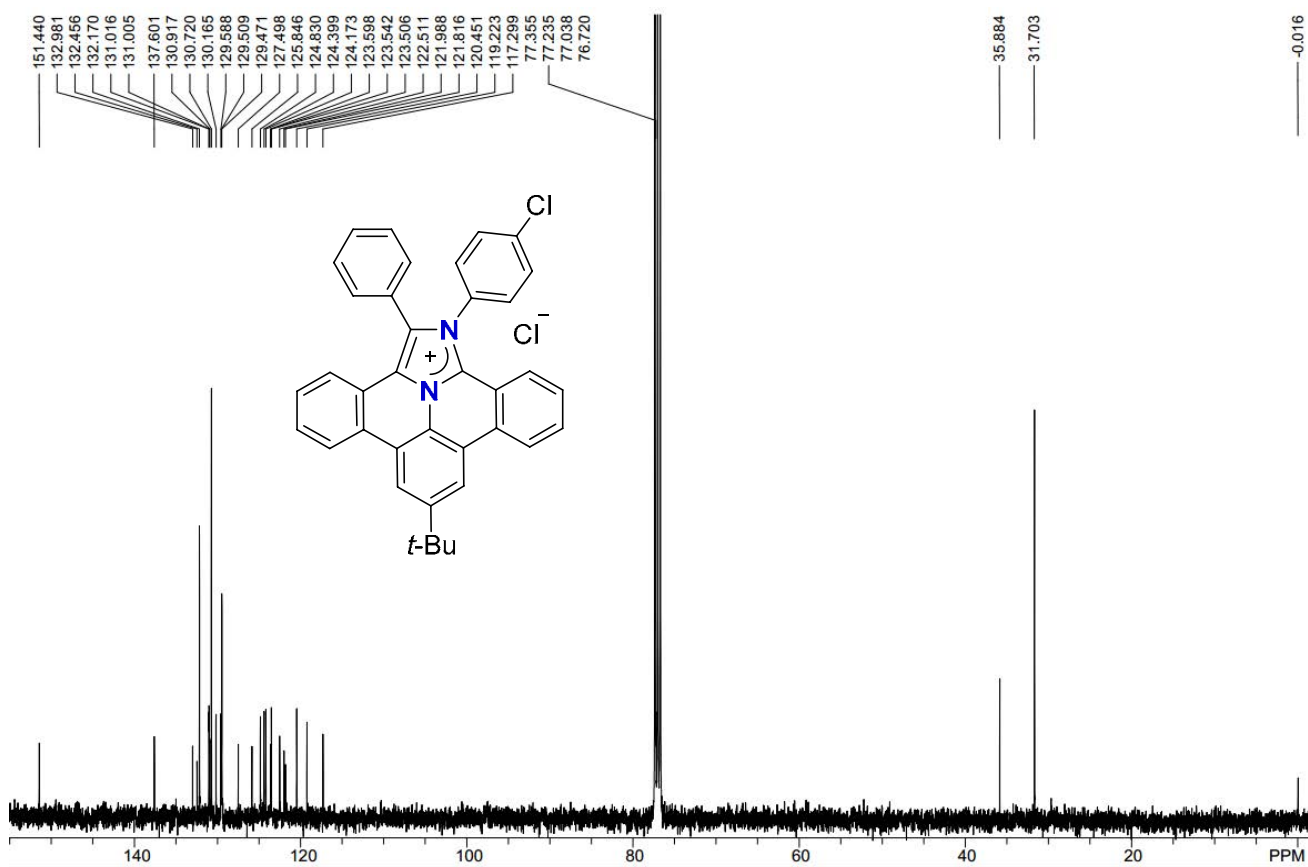

**Figure S12.** <sup>13</sup>C NMR spectrum of **3f** (100 MHz, CDCl<sub>3</sub>, 300 K).



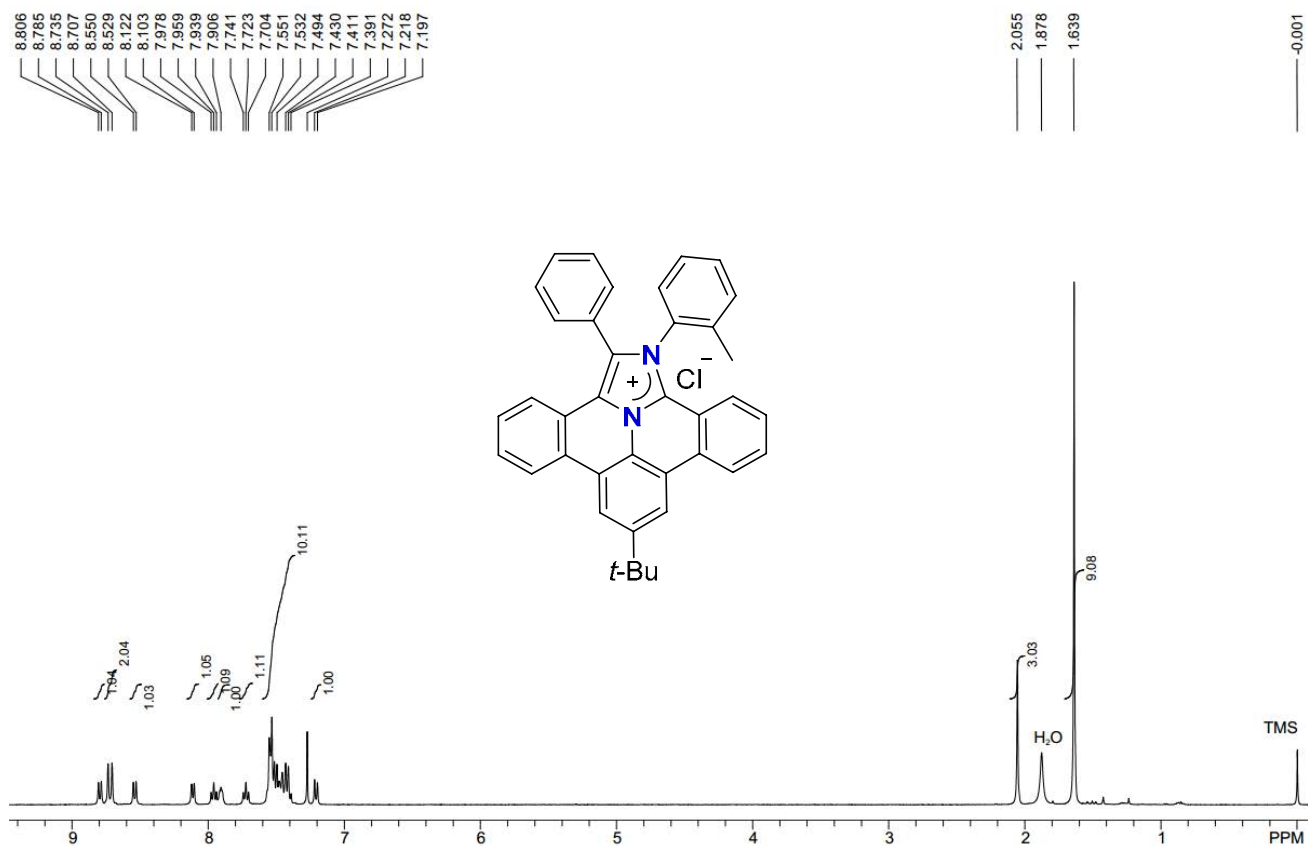

Figure S13. <sup>1</sup>H NMR spectrum of **3g** (400 MHz, CDCl<sub>3</sub>, 300 K).

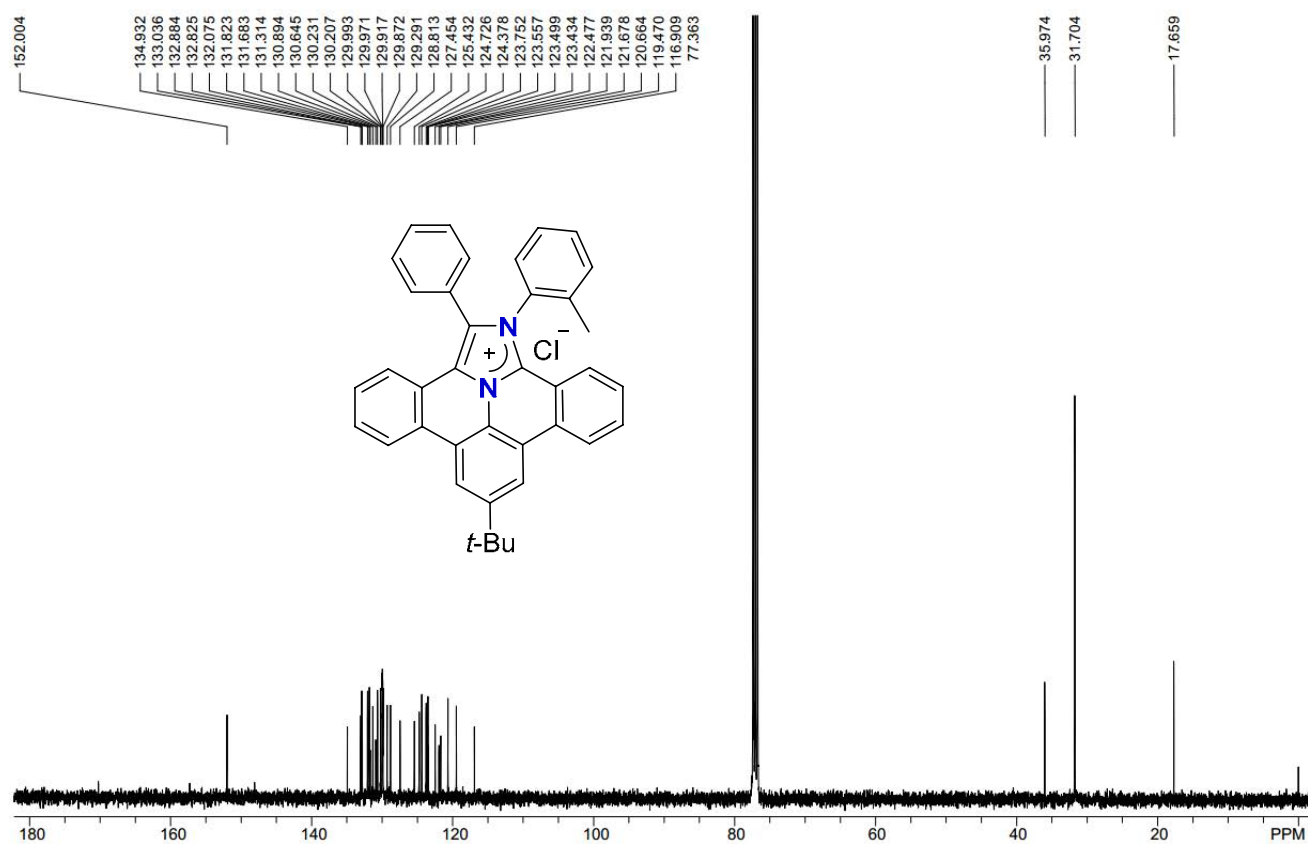

Figure S14. <sup>13</sup>C NMR spectrum of **3g** (100 MHz, CDCl<sub>3</sub>, 300 K).

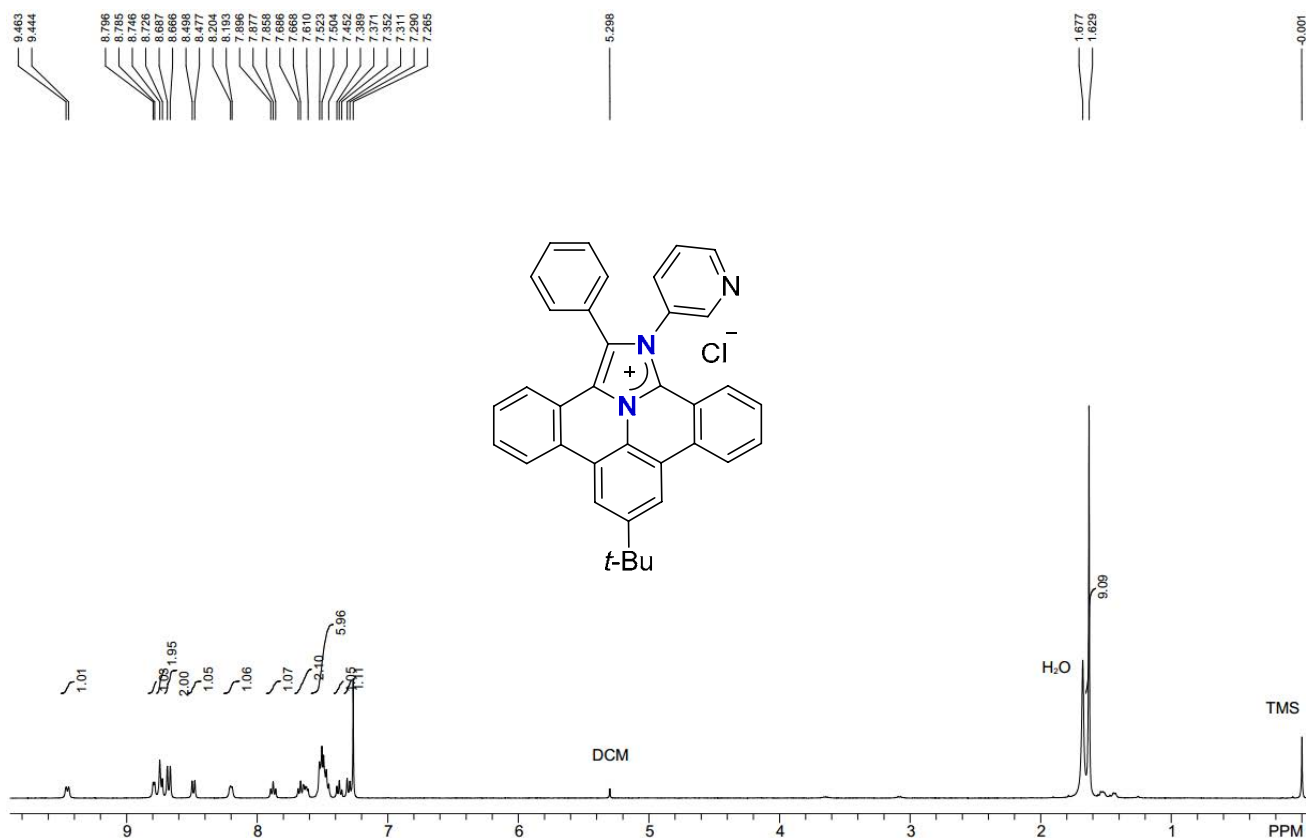

**Figure S15.** <sup>1</sup>H NMR spectrum of **3h** (400 MHz, CDCl<sub>3</sub>, 300 K).

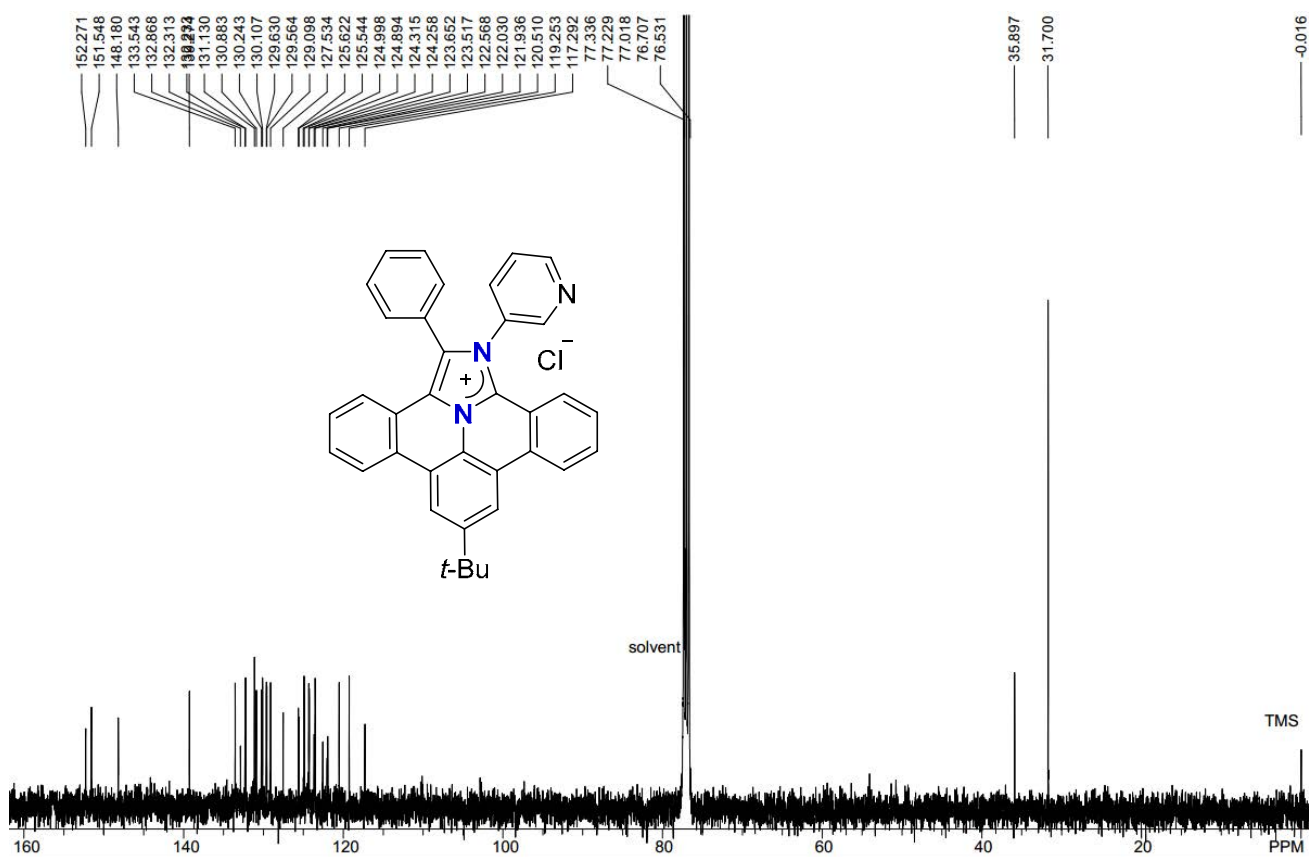

**Figure S16.** <sup>13</sup>C NMR spectrum of **3h** (100 MHz, CDCl<sub>3</sub>, 300 K).

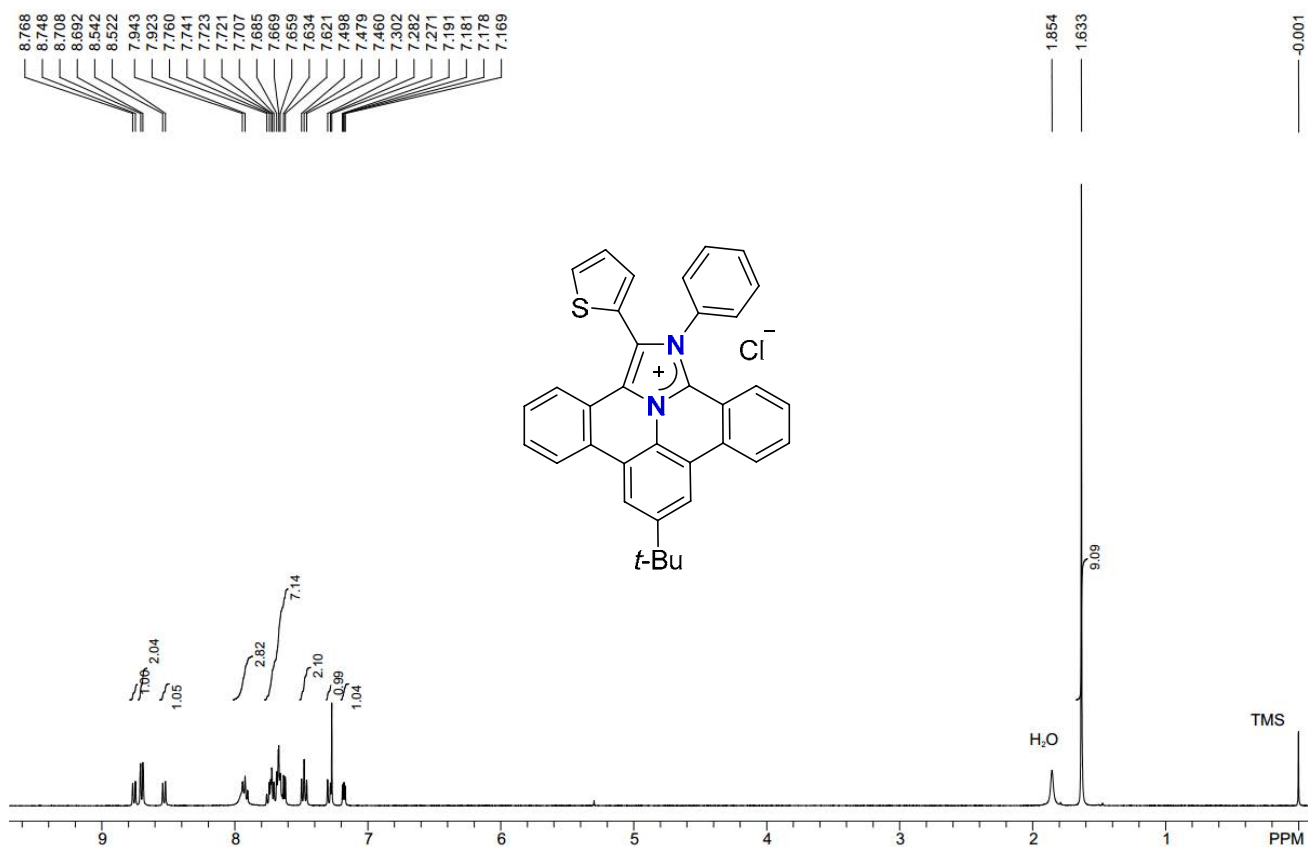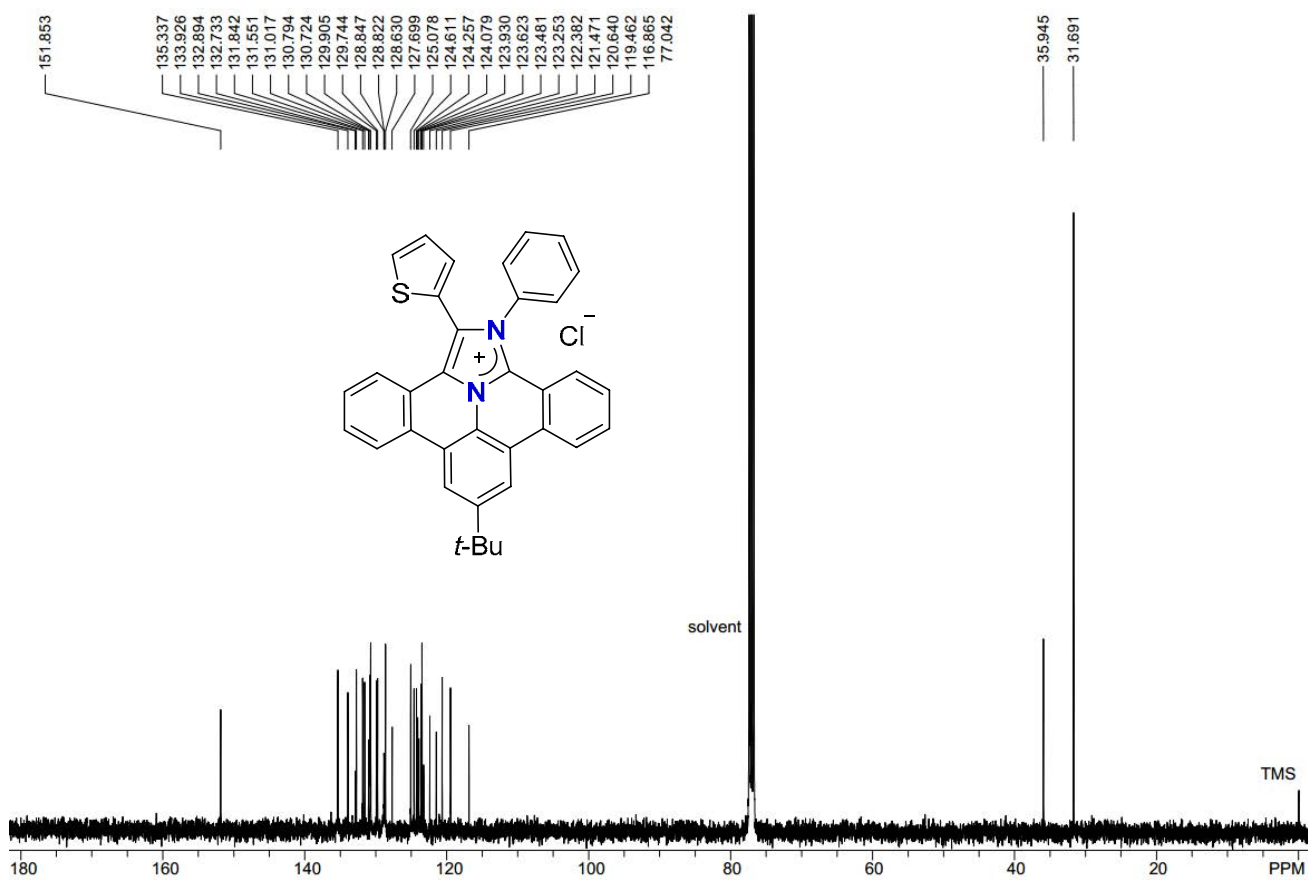

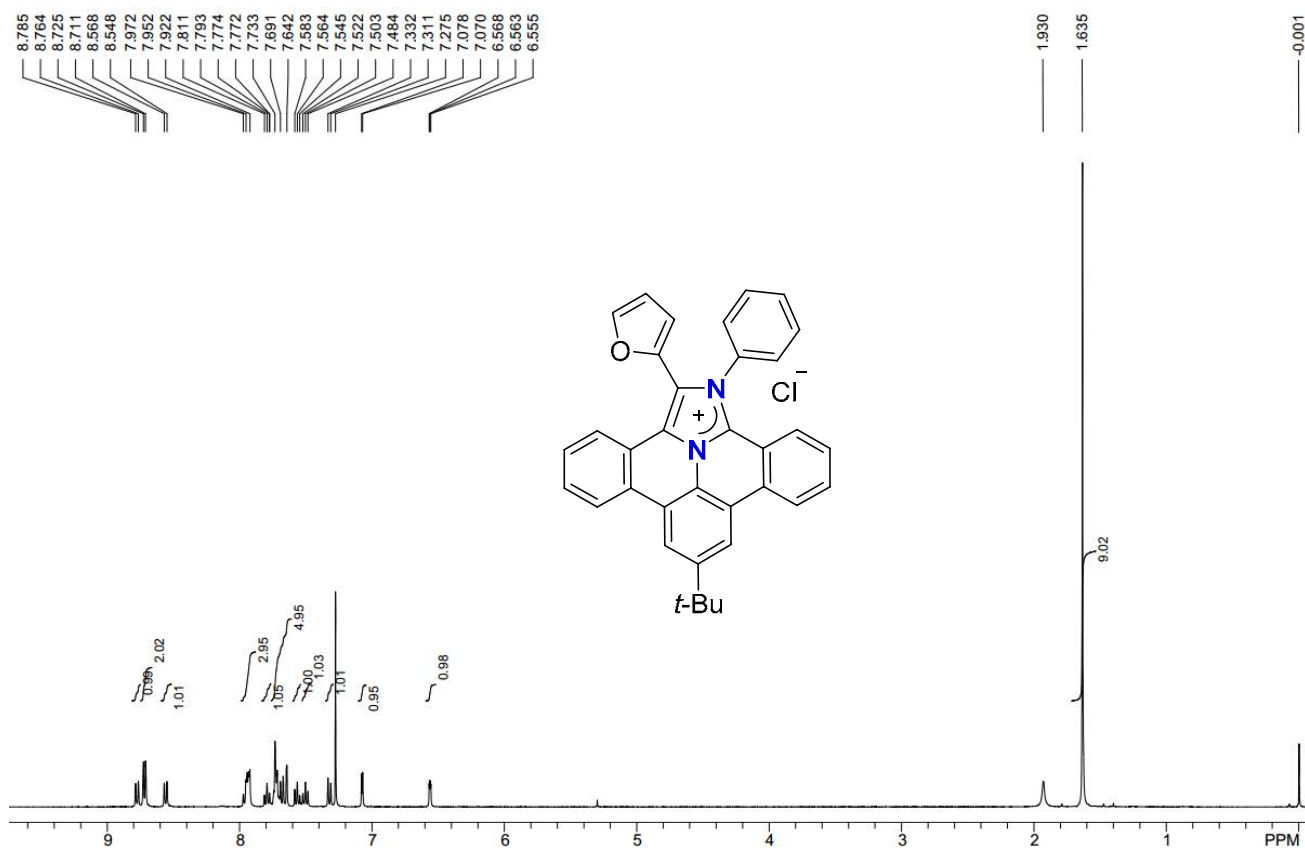

**Figure S19.** <sup>1</sup>H NMR spectrum of **3j** (400 MHz, CDCl<sub>3</sub>, 300 K).

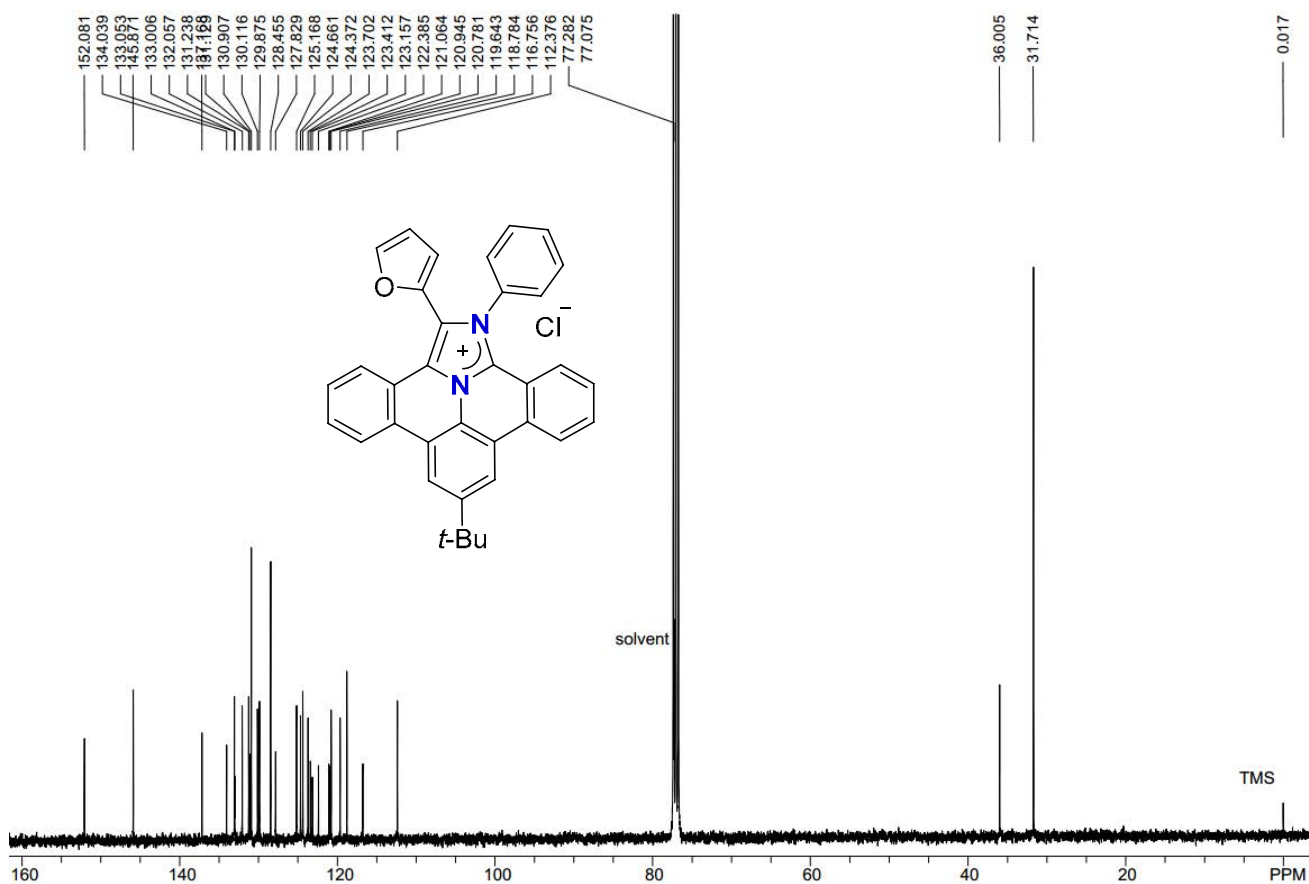

**Figure S20.** <sup>13</sup>C NMR spectrum of **3j** (100 MHz, CDCl<sub>3</sub>, 300 K).

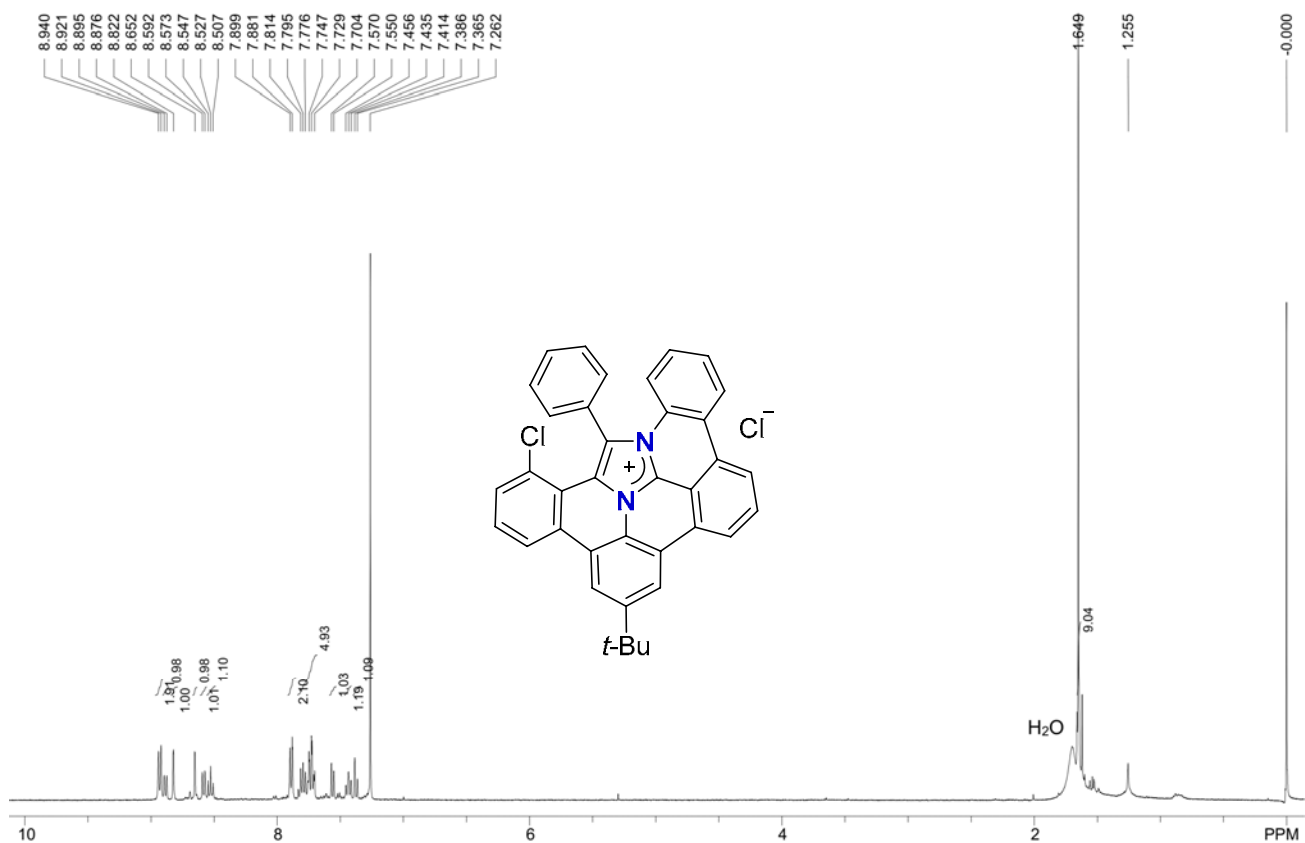

**Figure S21.** <sup>1</sup>H NMR spectrum of **3k** (400 MHz, CDCl<sub>3</sub>, 300 K).

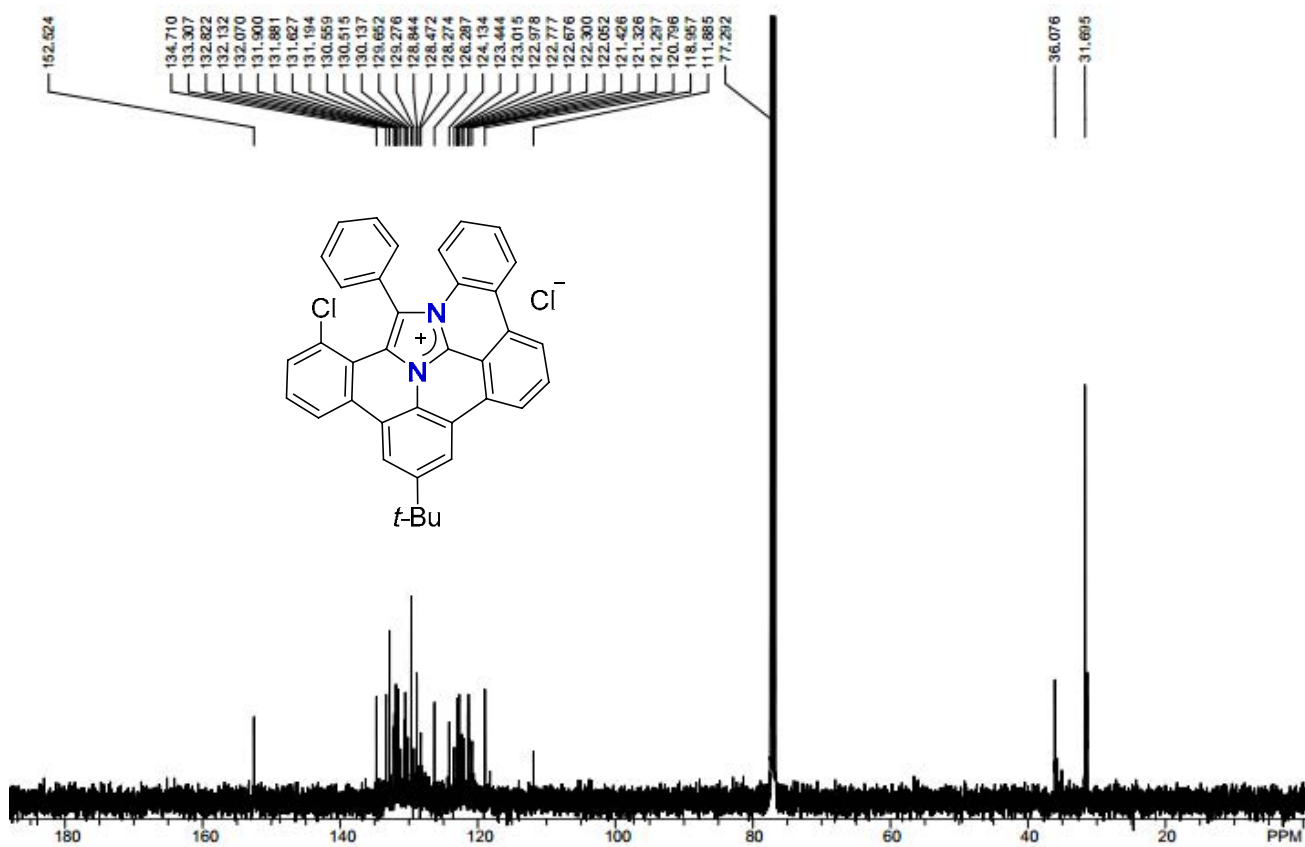

**Figure S22.** <sup>13</sup>C NMR spectrum of **3k** (100 MHz, CDCl<sub>3</sub>, 300 K).

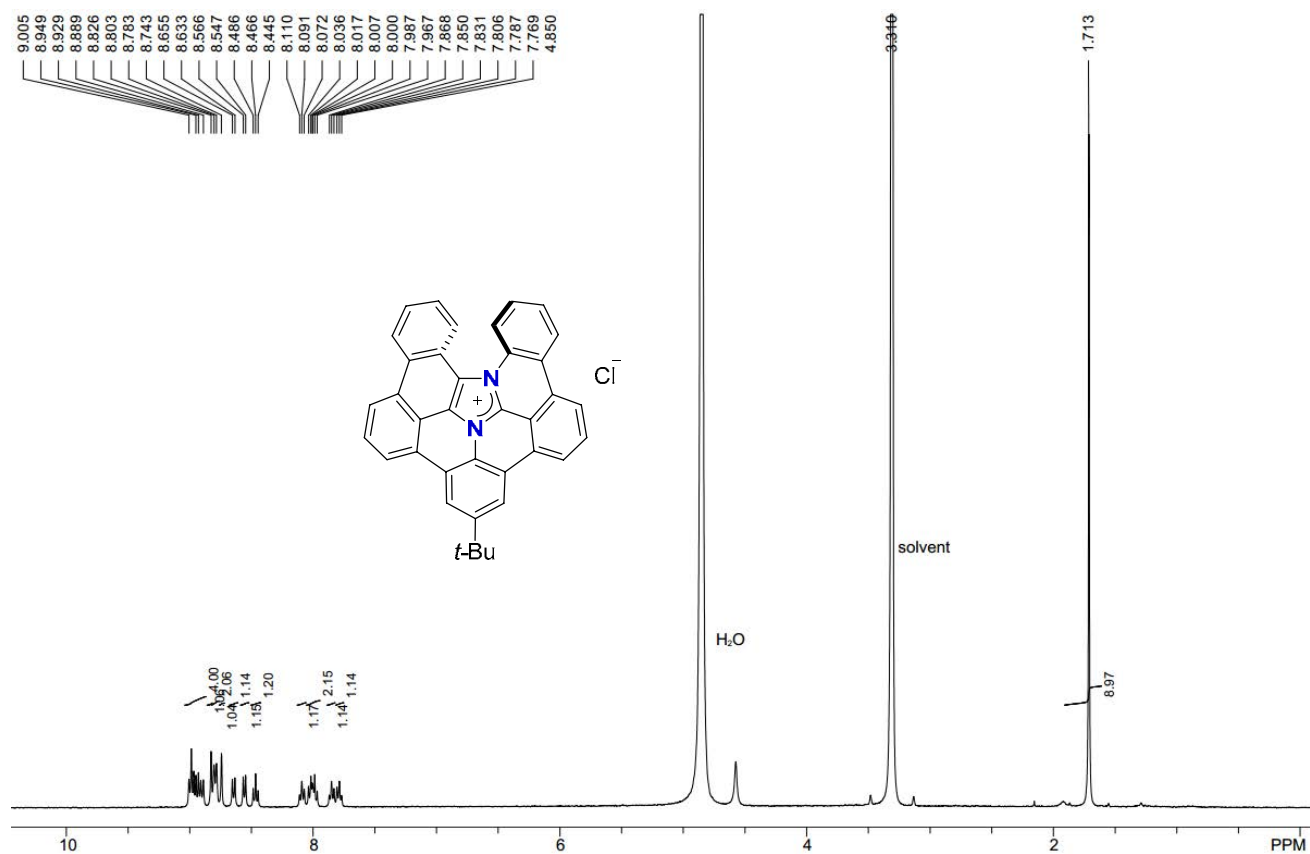

**Figure S23.**  $^1\text{H}$  NMR spectrum of **4a** (400 MHz,  $\text{CD}_3\text{OD}$ , 300 K).

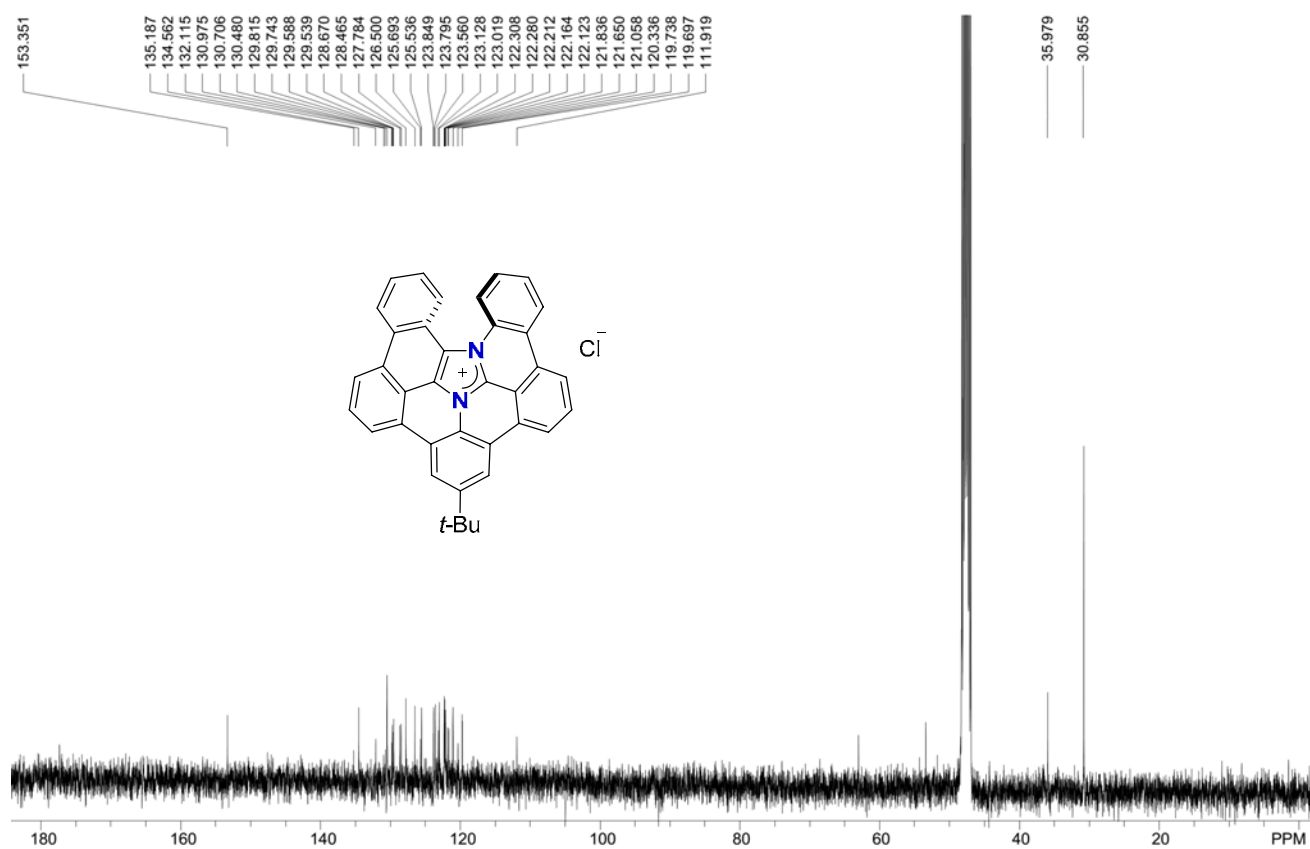

**Figure S24.**  $^{13}\text{C}$  NMR spectrum of **4a** (100 MHz,  $\text{CD}_3\text{OD}$ , 300 K).

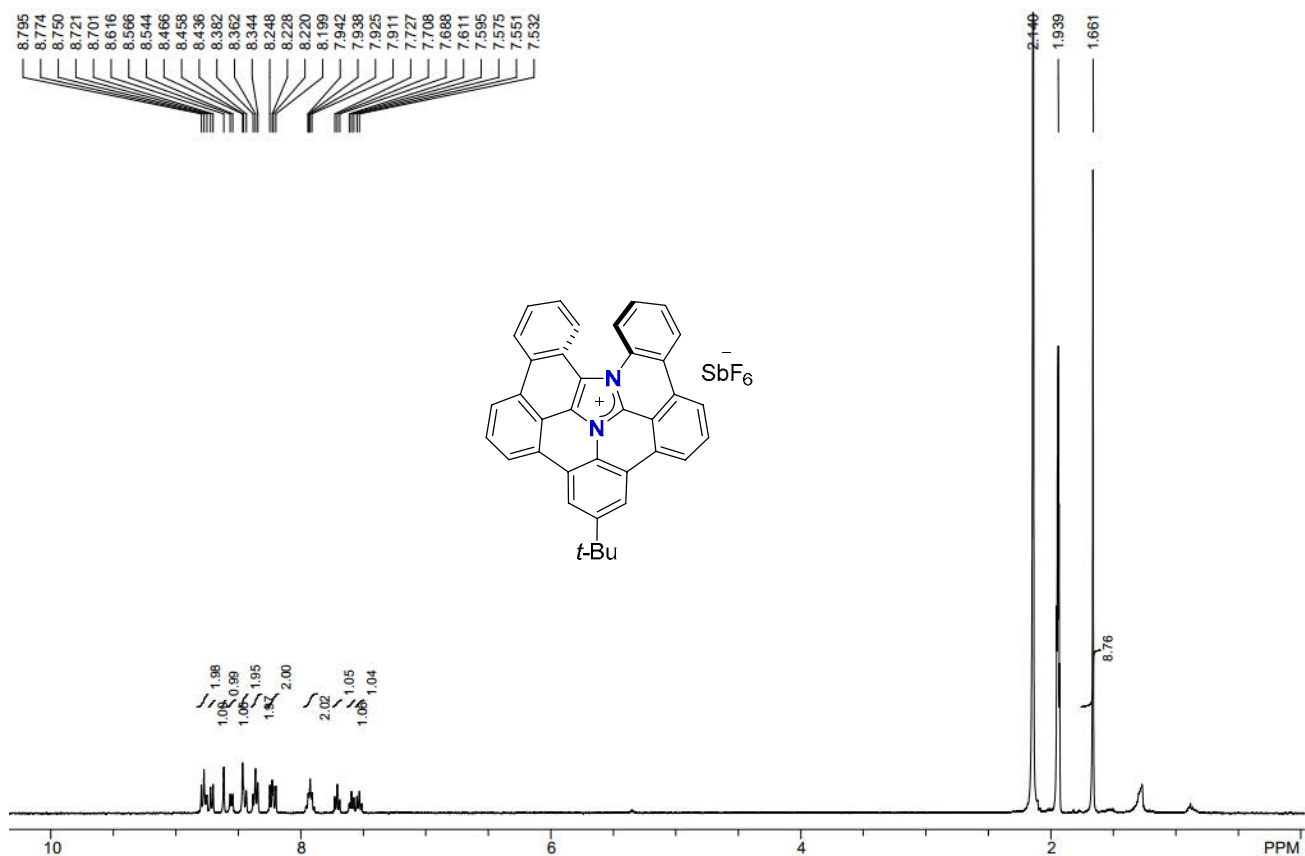

**Figure S25.**  $^1\text{H}$  NMR spectrum of **4b** (400 MHz,  $\text{CD}_3\text{CN}$ , 300 K).

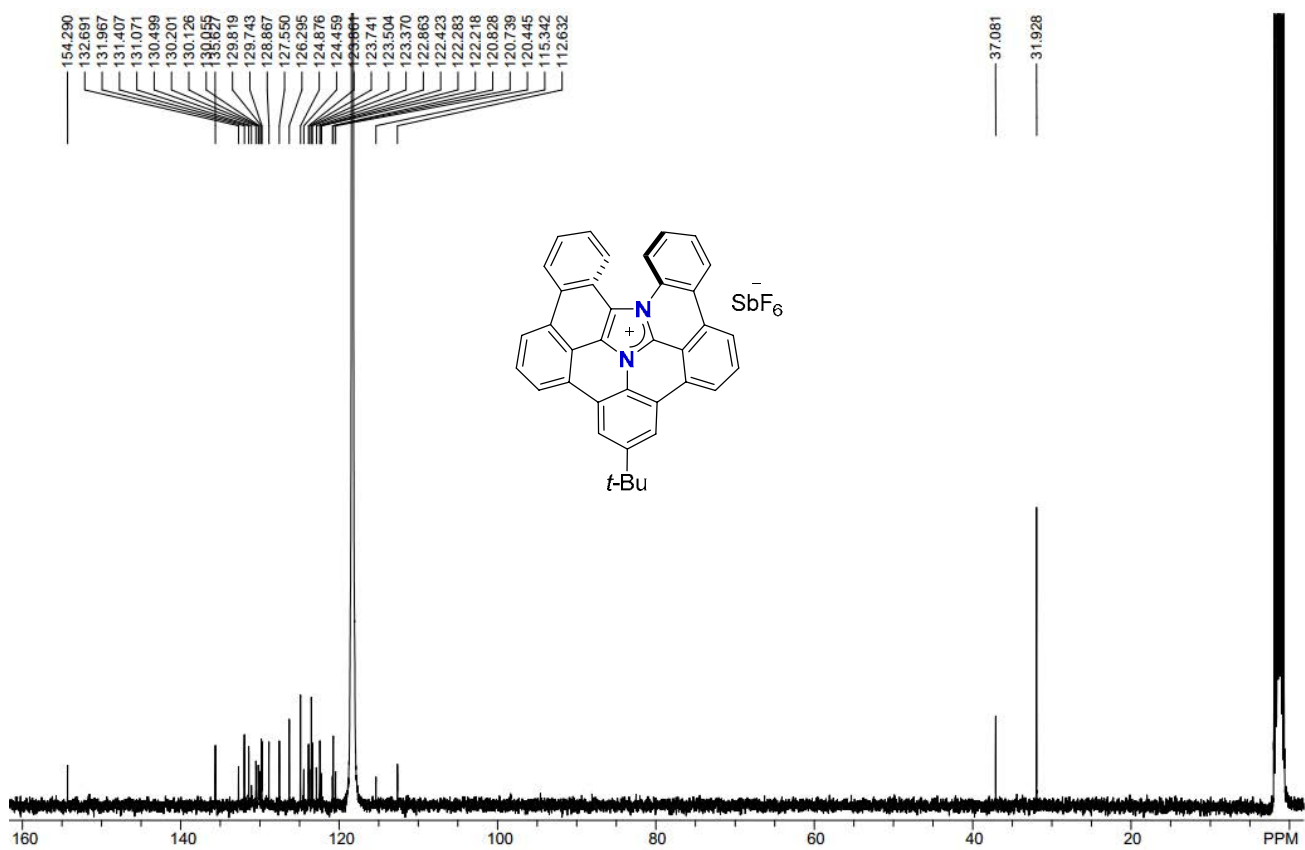

**Figure S26.**  $^{13}\text{C}$  NMR spectrum of **4b** (100 MHz,  $\text{CD}_3\text{CN}$ , 300 K).

### 3. Optical Properties

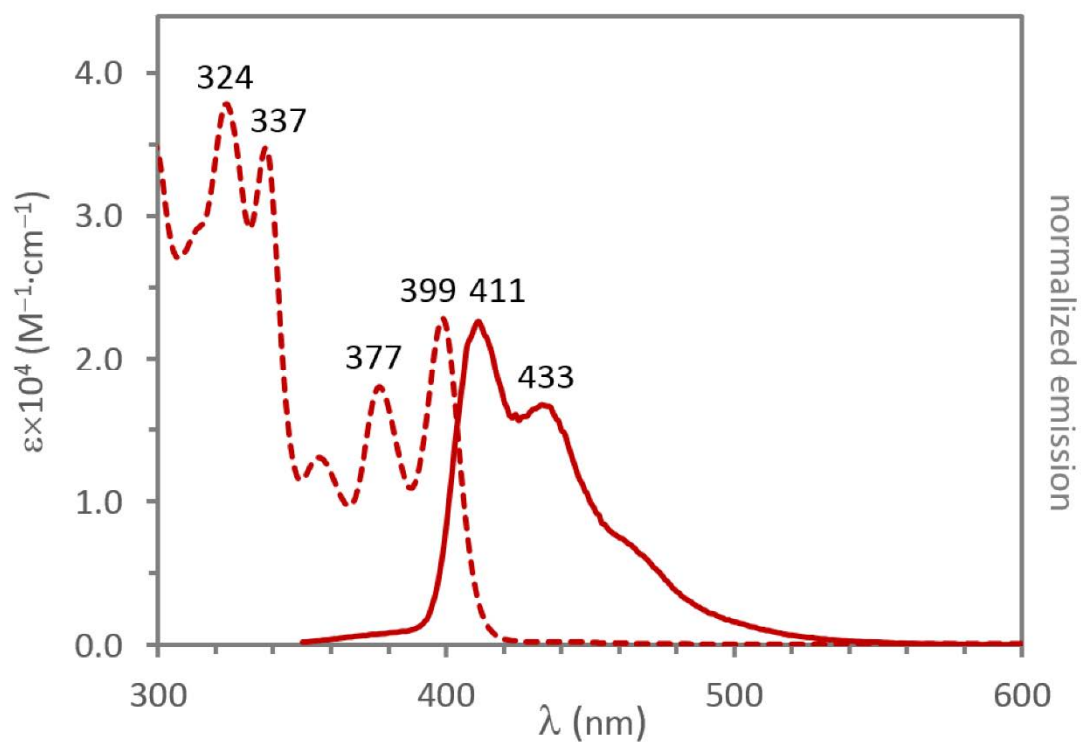

**Figure S27.** UV-vis absorption ( $2.5 \times 10^{-5}$  M) and emission ( $2.5 \times 10^{-6}$  M; excited at 340 nm) spectra of **4b** in dichloromethane.

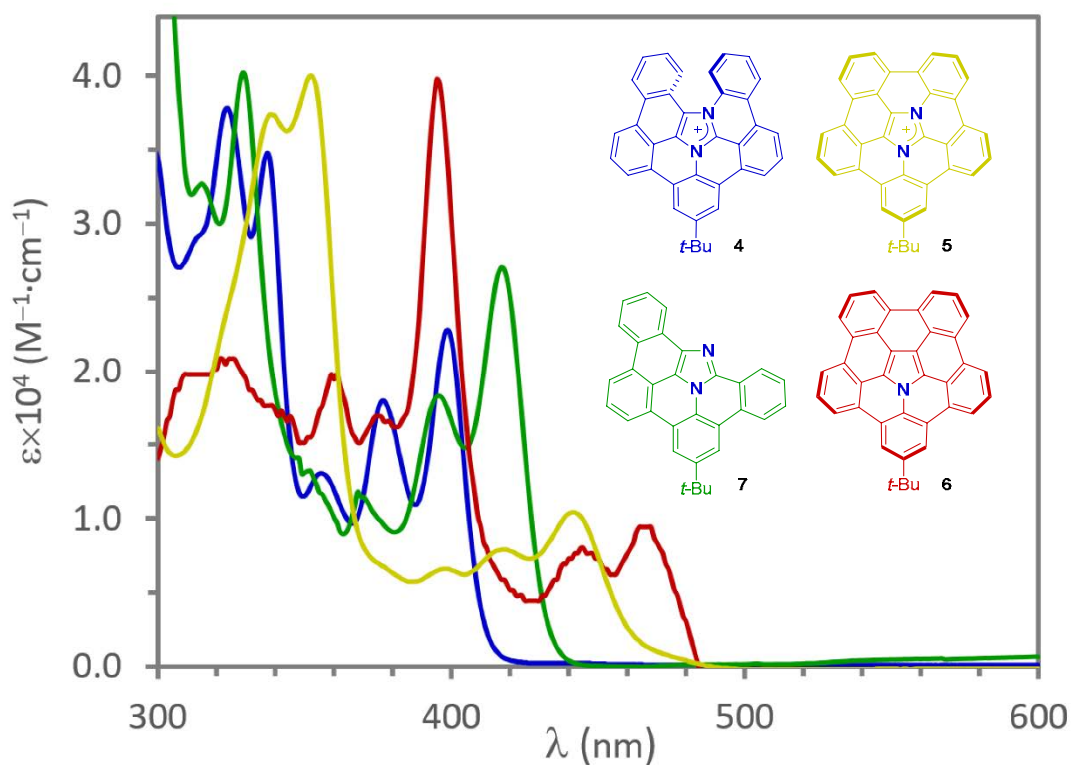

**Figure S28.** UV-vis absorption spectra of **4b** ( $2.5 \times 10^{-5}$  M), **5** ( $2.0 \times 10^{-5}$  M), **6** ( $2.8 \times 10^{-5}$  M), and **7** ( $2.0 \times 10^{-5}$  M) in dichloromethane.



#### 4. X-Ray Crystallographic Data

Single crystals suitable for X-ray analysis for **3a** and **3k** were obtained by slow evaporation of sample solution in dichloromethane at room temperature. A single crystal was mounted with mineral oil on a loop-type mount and transferred to the goniometer of a Bruker D8 Quest diffractometer. The radiation was performed with Multilayer Mirror-monochromated Incoatec microfocus source (Mo-K $\alpha$ ,  $\lambda = 0.71073$  Å).

On the other hand, needle-like single crystals of **4b** were obtained by slow vapor diffusion of hexane into a solution with a saturated concentration of **4b** in 1,2-dichlorobenzene. Data collection for X-ray analysis was conducted by Rigaku XtaLAB Synergy-Custom diffractometer (Cu-K $\alpha$ ,  $\lambda = 1.54184$  Å) equipped with a Rigaku HyPix-Arc 150°.

The structures were solved by direct method with SHELXT<sup>4</sup> and refined by full-matrix least-squares techniques against  $F^2$  with SHELXL-2018/3.<sup>4</sup> The intensities were corrected for Lorentz and polarization effects. The non-hydrogen atoms were refined anisotropically. Hydrogen atoms were placed using AFIX instructions. In the **4b** crystal packing structure, the heavily disordered solvent molecules which could not be modelled were removed by applying the SQUEEZE protocol in PLATON<sup>5</sup> software.

---

(4) Sheldrick, G. M. *Acta Cryst.* **2015**, *A71*, 3-8.

(5) Spek, A. L. *J. Appl. Cryst.* **2003**, *36*, 7–13.

**Table S1.** Crystal data and structure refinement for **3a**, **3k**, and **4b**.

| compound                                         | <b>3a</b>                                                         | <b>3k</b>                                                                     | <b>4b</b>                                                         |
|--------------------------------------------------|-------------------------------------------------------------------|-------------------------------------------------------------------------------|-------------------------------------------------------------------|
| CCDC number                                      | <b>2160757</b>                                                    | <b>2160758</b>                                                                | <b>2160759</b>                                                    |
| Molecular formula                                | C <sub>37</sub> H <sub>29</sub> ClN <sub>2</sub>                  | C <sub>37</sub> H <sub>32</sub> Cl <sub>2</sub> N <sub>2</sub> O <sub>3</sub> | C <sub>37</sub> H <sub>25</sub> N <sub>2</sub> F <sub>6</sub> Sb  |
| Formula weight                                   | 537.07                                                            | 623.54                                                                        | 770.09                                                            |
| Temperature (K)                                  | 100                                                               | 100                                                                           | 100                                                               |
| Wavelength (Å)                                   | 0.71073                                                           | 0.71073                                                                       | 1.54184                                                           |
| Crystal system                                   | monoclinic                                                        | Triclinic                                                                     | Monoclinic                                                        |
| Space group                                      | <i>C2/m</i>                                                       | <i>P</i> -1                                                                   | <i>P2<sub>1</sub>/c</i>                                           |
| Unit cell dimensions a (Å)                       | 30.678(3)                                                         | 11.6921(13)                                                                   | 6.83820(10)                                                       |
| b (Å)                                            | 6.7193(5)                                                         | 11.7421(12)                                                                   | 31.9395(3)                                                        |
| c (Å)                                            | 13.7302(14)                                                       | 12.1976(12)                                                                   | 29.5549(3)                                                        |
| α (°)                                            | 90                                                                | 85.354(3)                                                                     | 90                                                                |
| β (°)                                            | 102.728(4)                                                        | 62.684(3)                                                                     | 91.5790(10)                                                       |
| γ (°)                                            | 90                                                                | 88.515(3)                                                                     | 90                                                                |
| Volume (Å <sup>3</sup> )                         | 2760.7(4)                                                         | 1482.9(3)                                                                     | 6452.60(13)                                                       |
| Z                                                | 4                                                                 | 2                                                                             | 8                                                                 |
| Density (calculated) (mg·m <sup>-3</sup> )       | 1.292                                                             | 1.397                                                                         | 1.585                                                             |
| Absorption coefficient (mm <sup>-1</sup> )       | 0.168                                                             | 0.261                                                                         | 7.740                                                             |
| F(000)                                           | 1128                                                              | 652                                                                           | 3076                                                              |
| Crystal size (mm <sup>3</sup> )                  | 0.020 x 0.200 x 0.220                                             | 0.100 x 0.140 x 0.200                                                         | 0.023 x 0.034 x 0.457                                             |
| Theta range (°)                                  | 2.25 to 28.70                                                     | 1.96 to 26.51                                                                 | 2.037 to 68.248                                                   |
| Index ranges                                     | -41<=h<=40<br>0<=k<=9<br>0<=l<=18                                 | -14<=h<=14<br>-14<=k<=14<br>-12<=l<=15                                        | -5<=h<=8<br>-38<=k<=38<br>-35<=l<=35                              |
| Reflections collected                            | 3825                                                              | 34882                                                                         | 72021                                                             |
| Min. and max. transmission                       | 0.9640, 0.9970                                                    | 0.9500, 0.9740                                                                | ---                                                               |
| Data / restraints / parameters                   | 3825 / 274 / 298                                                  | 6096 / 163 / 440                                                              | 11746 / 204 / 938                                                 |
| Goodness-of-fit on F <sup>2</sup>                | 1.069                                                             | 1.068                                                                         | 1.167                                                             |
| Final R indices [ <i>I</i> > 2σ( <i>I</i> )]     | <i>R</i> <sub>1</sub> = 0.0727<br><i>wR</i> <sub>2</sub> = 0.1582 | <i>R</i> <sub>1</sub> = 0.0827<br><i>wR</i> <sub>2</sub> = 0.1856             | <i>R</i> <sub>1</sub> = 0.0893<br><i>wR</i> <sub>2</sub> = 0.2234 |
| R indices (all data)                             | <i>R</i> <sub>1</sub> = 0.1474<br><i>wR</i> <sub>2</sub> = 0.1965 | <i>R</i> <sub>1</sub> = 0.1293<br><i>wR</i> <sub>2</sub> = 0.2155             | <i>R</i> <sub>1</sub> = 0.0920<br><i>wR</i> <sub>2</sub> = 0.2250 |
| Largest diff. peak and hole (e.Å <sup>-3</sup> ) | 0.391, -0.396                                                     | 1.063, -0.932                                                                 | 1.930, -2.394                                                     |

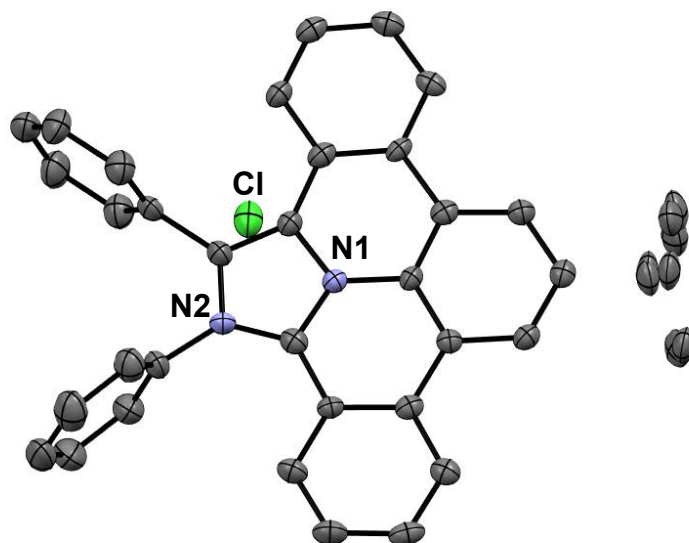

**Figure S29.** X-ray structures of **3a** with thermal ellipsoids of 50% probability. Hydrogen atoms were omitted for clarity.

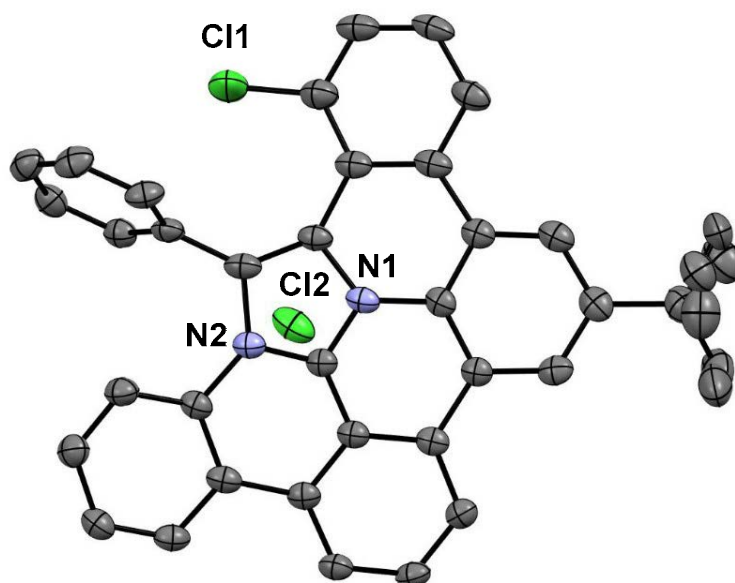

**Figure S30.** X-ray structures of **3k** with thermal ellipsoids of 50% probability. Hydrogen atoms and solvent molecules were omitted for clarity.

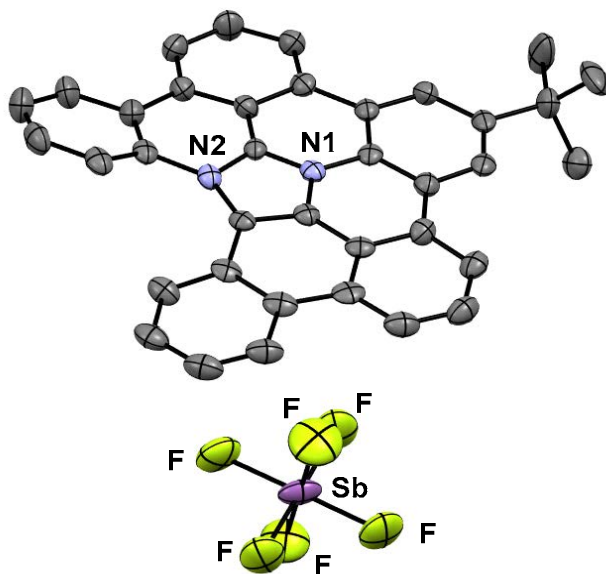

**Figure S31.** X-ray structures of **4b** with thermal ellipsoids of 50% probability. Hydrogen atoms and 1,2-dichlorobenzene molecules were omitted for clarity.

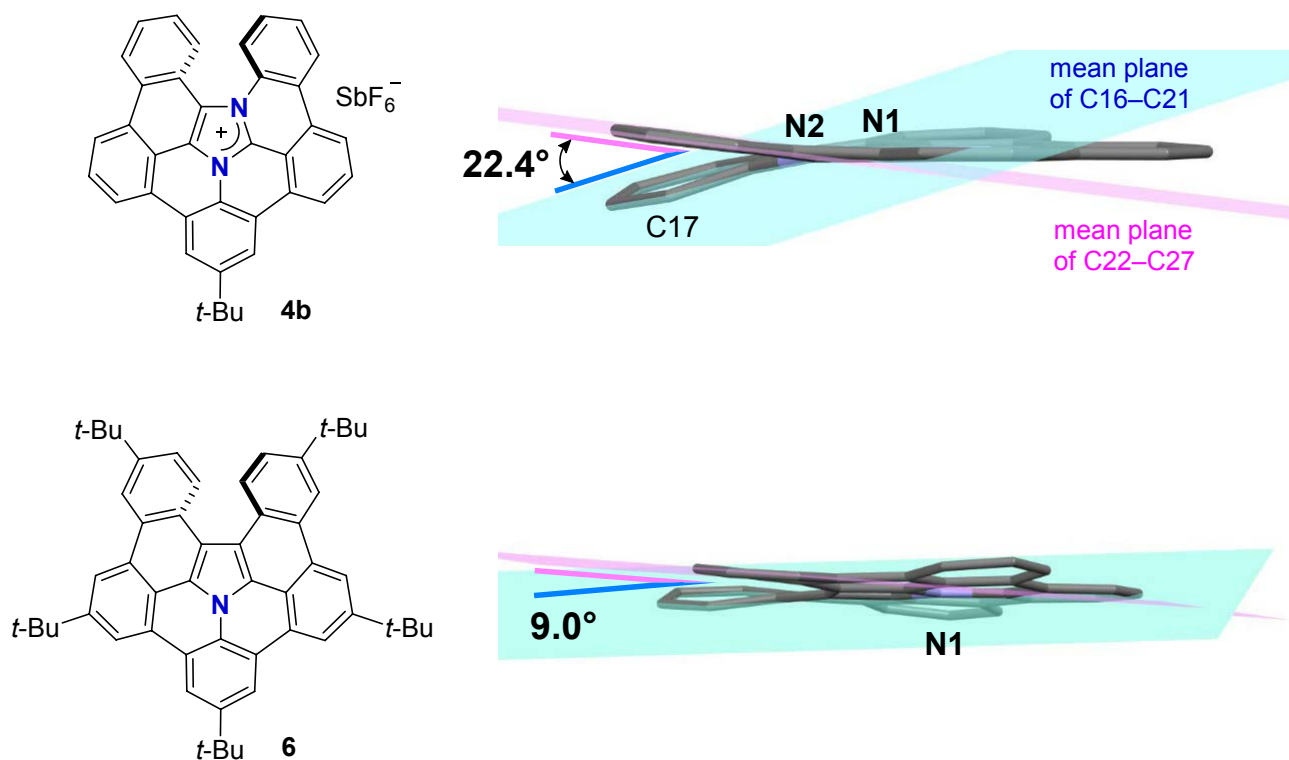

**Figure S32.** Dihedral angles between the terminal benzene rings of **4b** and monoaza analogue **6**.<sup>6</sup>

(6) H. Yokoi, S. Hiroto and H. Shinokubo, *J. Am. Chem. Soc.* 2018, **140**, 4649–4655.

## 5. Theoretical Calculations

The computations were performed using workstation at High-Performance Center for Computational Science, Nanyang Technological University, Singapore. All the calculations were performed by using Gaussian 16 (revision A.03) program<sup>7</sup> by the B3LYP method<sup>8</sup> with the 6-31G(d) basis set<sup>9</sup> for structure optimization, vibrational frequency, time-dependent density functional theory (TD-DFT). Grimme' D3 dispersion correction<sup>10</sup> and SMD solvation model (with dichloroethane)<sup>11</sup> were used to investigate the reaction mechanism of 1,3-dipolar cycloaddition (Figure S36 and S37). The geometry of azahelicene **4** was optimized under C<sub>1</sub> symmetry constraint. Each transition state structure was optimized without any symmetry assumptions and IRC calculations were also performed to check the transition states. The *tert*-butyl substituent is replaced by a hydrogen atom.

- 
- (7) M. J. Frisch, G. W. Trucks, H. B. Schlegel, G. E. Scuseria, M. A. Robb, J. R. Cheeseman, G. Scalmani, V. Barone, G. A. Petersson, H. Nakatsuji, X. Li, M. Caricato, A. V. Marenich, J. Bloino, B. G. Janesko, R. Gomperts, B. Mennucci, H. P. Hratchian, J. V. Ortiz, A. F. Izmaylov, J. L. Sonnenberg, D. Williams-Young, F. Ding, F. Lipparini, F. Egidi, J. Goings, B. Peng, A. Petrone, T. Henderson, D. Ranasinghe, V. G. Zakrzewski, J. Gao, N. Rega, G. Zheng, W. Liang, M. Hada, M. Ehara, K. Toyota, R. Fukuda, J. Hasegawa, M. Ishida, T. Nakajima, Y. Honda, O. Kitao, H. Nakai, T. Vreven, K. Throssell, J. A. Montgomery, Jr., J. E. Peralta, F. Ogliaro, M. J. Bearpark, J. J. Heyd, E. N. Brothers, K. N. Kudin, V. N. Staroverov, T. A. Keith, R. Kobayashi, J. Normand, K. Raghavachari, A. P. Rendell, J. C. Burant, S. S. Iyengar, J. Tomasi, M. Cossi, J. M. Millam, M. Klene, C. Adamo, R. Cammi, J. W. Ochterski, R. L. Martin, K. Morokuma, O. Farkas, J. B. Foresman and D. J. Fox, *Gaussian 16, Revision A.03*, Gaussian, Inc., Wallingford CT, 2016.
- (8) (a) A. D. Becke, *J. Chem. Phys.* 1993, **98**, 5648–5652. (b) C. Lee, W. Yang and R. G. Parr, *Phys. Rev. B* 1998, **37**, 785–789.
- (9) (a) W. J. Hehre, R. Ditchfield and J. A. Pople, *J. Chem. Phys.* 1972, **56**, 2257–2261. (b) R. Ditchfield, W. J. Hehre and J. A. Pople, *J. Chem. Phys.* 1971, **54**, 724–728.
- (10) S. Grimme, J. Antony, S. Ehrlich and H. Krieg, *J. Chem. Phys.* 2010, **132**, 154104.
- (11) A. V. Marenich, C. J. Cramer and D. G. Truhlar, *J. Phys. Chem. B* 2009, **113**, 6378–6396.

## 5-1. Reaction Mechanism for Cycloaddition

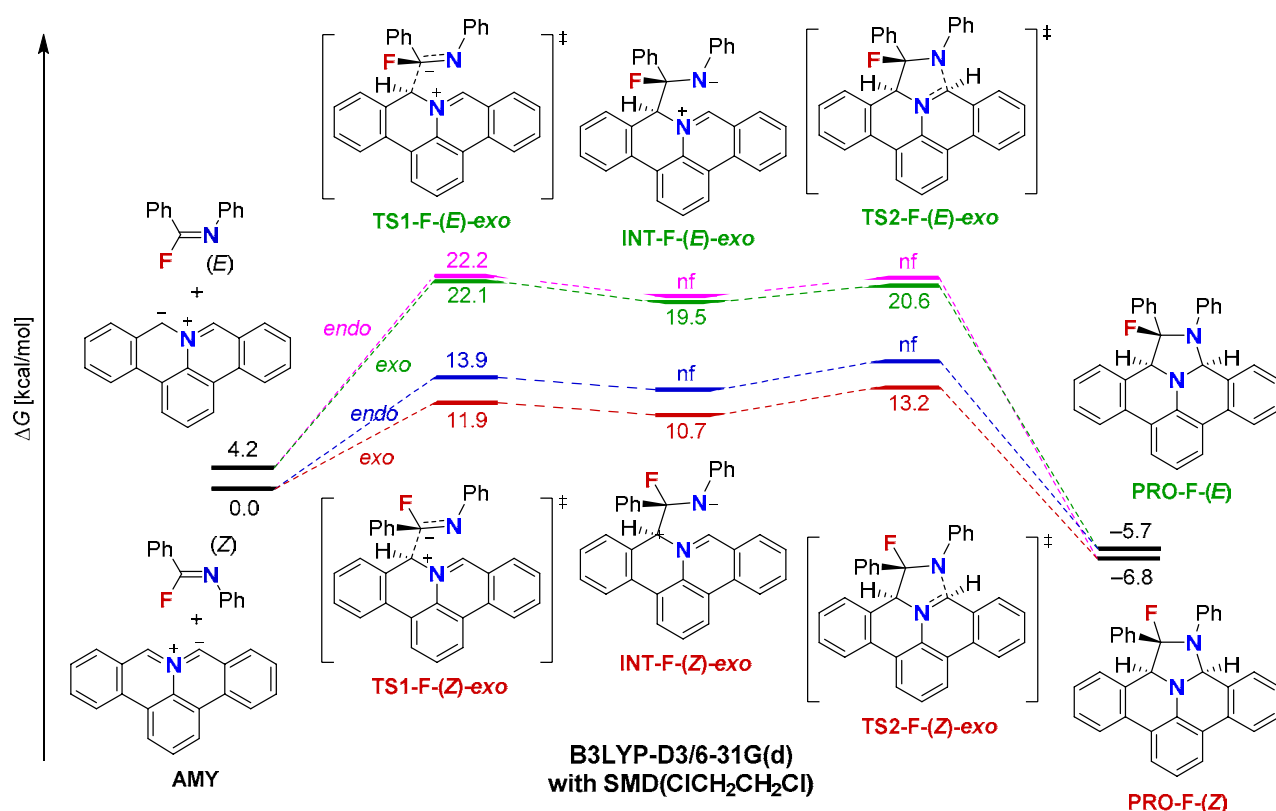

**Figure S33.** Energy diagram of cycloaddition of imidolyl fluoride **2-F** and an azomethine ylide formed from of iminium salt **1**. The term “nf” represents “not found”.

**Note)** **TS1-F** was successfully determined for all the isomers. In the cases of (*Z*)-*endo* and (*E*)-*endo*, however, all subsequent calculations to determine **INT-F** did not give any intermediate presumably due to the small activation barrier of **TS2-F**, resulting in the direct formation of **PRO-F**.

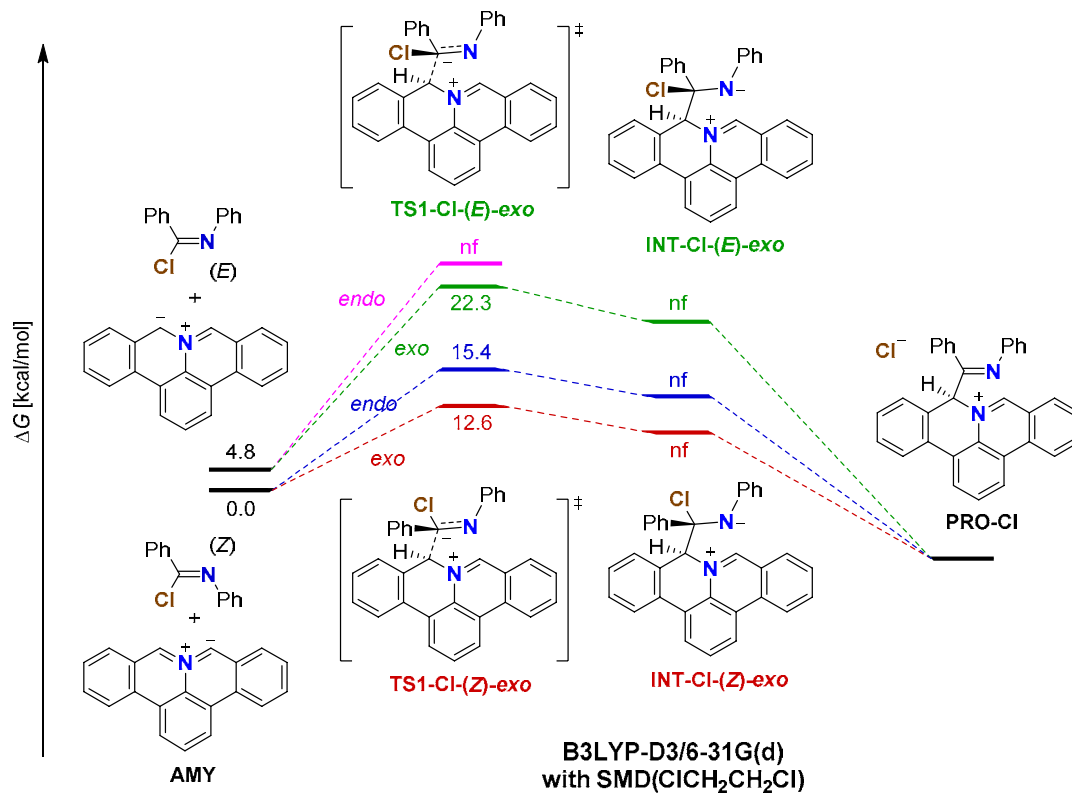

**Figure S34.** Energy diagram of cycloaddition of imidolyl chloride **2-Cl** and an azomethine ylide formed from of iminium salt **1**. The term “nf” represents “not found”.

**Note)** **TS1-Cl** was successfully determined for the (*Z*)-*exo*, (*Z*)-*endo*, and (*E*)-*exo* isomers. However, all subsequent calculations to determine **INT-Cl** did not converge and resulted in the dissociation of the chlorine atom to give **PRO-Cl**.

## 5-2. Reaction Mechanism for Helicene Flipping

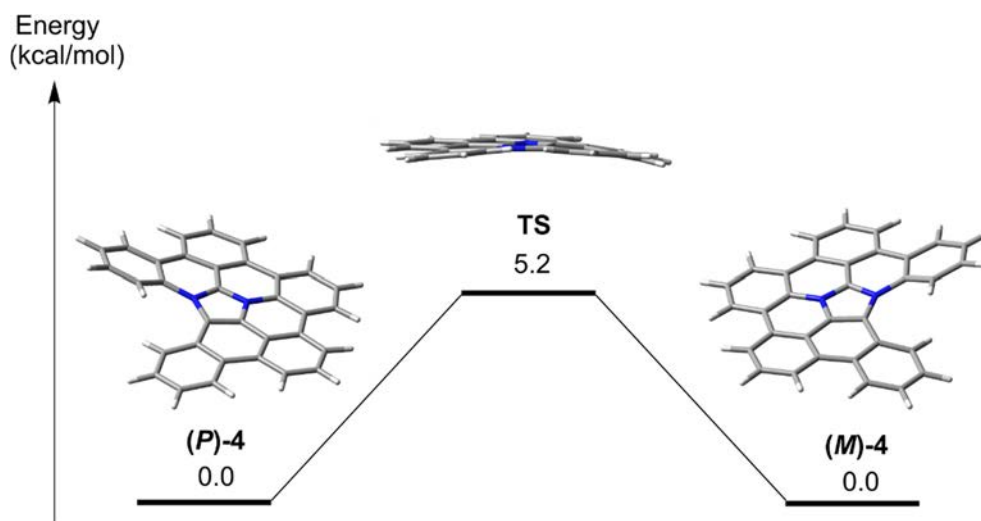

**Figure S35.** Energy diagram of bowl inversion of **4**. Values (kcal/mol) are relative Gibbs free energies ( $\Delta G$ ) at 298.15 K and 1 atm.

## 5-3. Molecular Orbitals of **4**

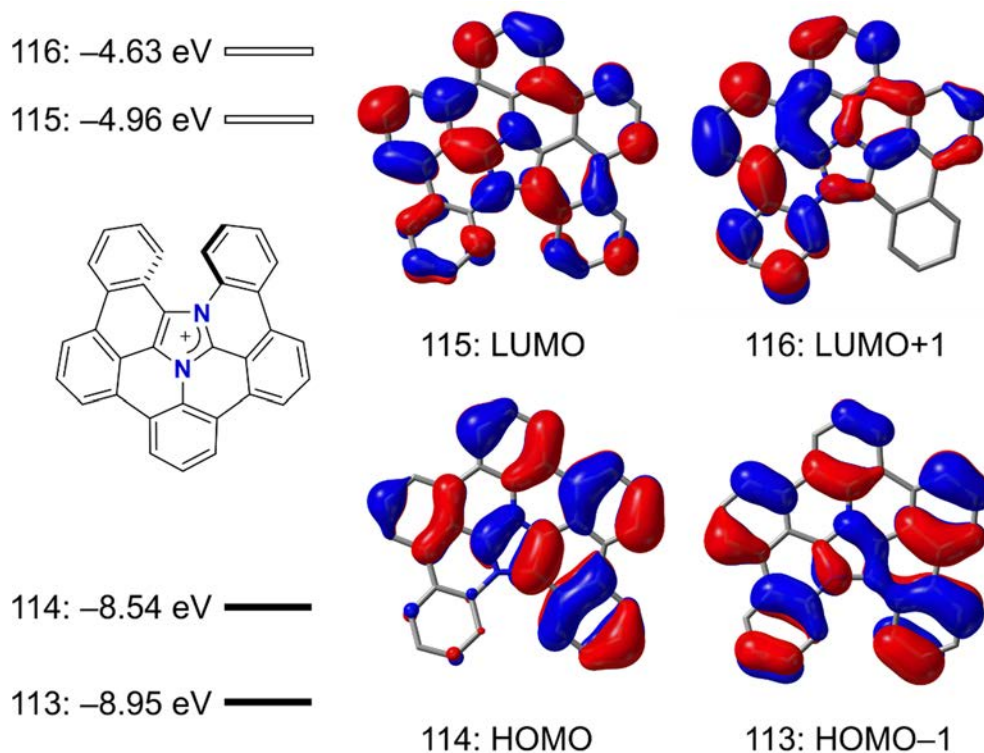

**Figure S36.** Kohn-Sham molecular orbitals of **4**. For each MO, the view from the convex surface of the molecule.



#### 5-4. TD-DFT Calculations

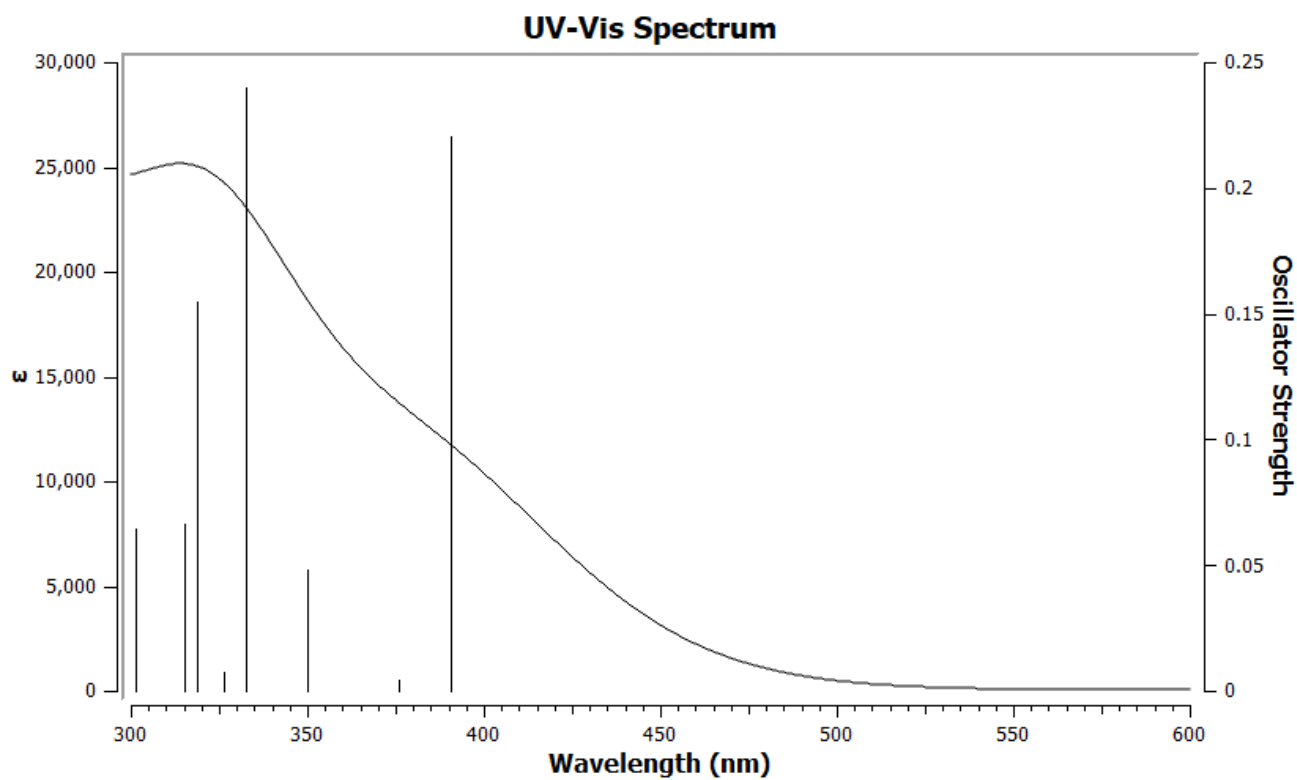

**Figure S37.** A simulated absorption spectrum of **4** by TD-DFT calculations.

**Table S2.** Selected wavelengths, oscillator strengths, major electronic transition of **4**.

| Wavelength<br>(Å) | Oscillator<br>Strengths (f) | Transitions                                                                                               |        |                    |
|-------------------|-----------------------------|-----------------------------------------------------------------------------------------------------------|--------|--------------------|
|                   |                             |                                                                                                           |        | 113→117 (-0.12561) |
|                   |                             |                                                                                                           |        | 114→117 (-0.14390) |
|                   |                             |                                                                                                           |        | 114→118 (0.43031)  |
|                   |                             |                                                                                                           |        | 114→119 (0.19201)  |
| 390.80            | 0.2208                      | 113→116 (-0.14519)<br>114→115 (0.67581)                                                                   |        |                    |
| 375.67            | 0.0041                      | 112→115 (-0.15689)<br>113→115 (0.40710)<br>114→116 (0.54008)                                              | 301.50 | 0.0644             |
| 349.94            | 0.0483                      | 112→115 (0.39200)<br>113→115 (0.43556)<br>114→116 (-0.25165)<br>114→117 (-0.21287)<br>114→118 (0.17582)   |        |                    |
| 332.45            | 0.2402                      | 112→115 (0.48965)<br>113→115 (-0.26833)<br>113→116 (0.14656)<br>114→116 (0.35467)                         | 297.64 | 0.0761             |
| 326.47            | 0.0073                      | 113→116 (0.21925)<br>114→117 (0.53580)<br>114→118 (0.34078)<br>114→119 (-0.13033)                         |        |                    |
| 318.74            | 0.1548                      | 112→115 (-0.19242)<br>112→116 (0.24334)<br>113→116 (0.53079)<br>114→115 (0.10818)<br>114→117 (-0.26908)   |        |                    |
| 315.25            | 0.0667                      | 111→115 (-0.16745)<br>112→116 (0.28428)<br>112→117 (-0.12432)<br>113→115 (-0.15079)<br>113→116 (-0.23079) | 291.71 | 0.0436             |
|                   |                             |                                                                                                           |        | 109→115 (0.15557)  |
|                   |                             |                                                                                                           |        | 112→116 (-0.15503) |
|                   |                             |                                                                                                           |        | 112→117 (0.11031)  |
|                   |                             |                                                                                                           |        | 113→116 (0.15881)  |
|                   |                             |                                                                                                           |        | 113→117 (-0.22192) |
|                   |                             |                                                                                                           |        | 113→118 (0.15075)  |
|                   |                             |                                                                                                           |        | 114→119 (0.54475)  |
|                   |                             |                                                                                                           |        | 111→115 (0.59271)  |
|                   |                             |                                                                                                           |        | 111→116 (-0.10502) |
|                   |                             |                                                                                                           |        | 112→116 (0.22568)  |
|                   |                             |                                                                                                           |        | 114→119 (0.14584)  |

## Cartesian Coordinates

### AMY

|   |            |             |             |
|---|------------|-------------|-------------|
| C | 0.00000000 | 1.20693100  | -2.44988700 |
| C | 0.00000000 | 1.24613400  | -1.04291400 |
| C | 0.00000000 | 0.00000000  | -0.34646900 |
| C | 0.00000000 | -1.24613400 | -1.04291400 |
| C | 0.00000000 | -1.20693100 | -2.44988700 |
| C | 0.00000000 | 0.00000000  | -3.13588300 |
| C | 0.00000000 | 2.50433200  | -0.30460400 |
| C | 0.00000000 | 2.42973700  | 1.11943700  |
| C | 0.00000000 | 1.18283600  | 1.75842900  |
| N | 0.00000000 | 0.00000000  | 1.07626900  |
| C | 0.00000000 | -1.18283600 | 1.75842900  |
| C | 0.00000000 | -2.42973700 | 1.11943700  |
| C | 0.00000000 | -2.50433200 | -0.30460400 |
| C | 0.00000000 | 3.77439300  | -0.91509800 |
| C | 0.00000000 | 4.93809300  | -0.15903500 |
| C | 0.00000000 | 4.86157200  | 1.24944600  |
| C | 0.00000000 | 3.63383500  | 1.87931100  |
| C | 0.00000000 | -3.63383500 | 1.87931100  |
| C | 0.00000000 | -4.86157200 | 1.24944600  |
| C | 0.00000000 | -4.93809300 | -0.15903500 |
| C | 0.00000000 | -3.77439300 | -0.91509800 |
| H | 0.00000000 | 2.13260400  | -3.01234000 |
| H | 0.00000000 | -2.13260400 | -3.01234000 |
| H | 0.00000000 | 0.00000000  | -4.22261000 |
| H | 0.00000000 | 1.09543700  | 2.83704400  |
| H | 0.00000000 | -1.09543700 | 2.83704400  |
| H | 0.00000000 | 3.85781600  | -1.99672000 |
| H | 0.00000000 | 5.90534500  | -0.65306400 |
| H | 0.00000000 | 5.77325400  | 1.84146300  |
| H | 0.00000000 | 3.56790500  | 2.96451600  |
| H | 0.00000000 | -3.56790500 | 2.96451600  |
| H | 0.00000000 | -5.77325400 | 1.84146300  |
| H | 0.00000000 | -5.90534500 | -0.65306400 |
| H | 0.00000000 | -3.85781600 | -1.99672000 |

### (Z)-2-F

|   |             |             |             |
|---|-------------|-------------|-------------|
| C | 3.69366400  | 1.48207500  | 0.27778700  |
| C | 2.32912400  | 1.21614100  | 0.22245400  |
| C | 1.87611700  | -0.09198900 | -0.02534000 |
| C | 2.80849800  | -1.12484000 | -0.21539800 |
| C | 4.17449400  | -0.85043800 | -0.15799800 |
| C | 4.62020200  | 0.45021300  | 0.08805800  |
| H | 4.03717700  | 2.49489200  | 0.46861900  |
| H | 1.60368700  | 2.00965300  | 0.36802600  |
| H | 2.46471700  | -2.13510600 | -0.40648600 |
| H | 4.89040100  | -1.65406900 | -0.30550900 |
| H | 5.68518800  | 0.66129200  | 0.13197900  |
| C | 0.43381500  | -0.36505200 | -0.08134900 |
| N | -0.47491900 | 0.49647100  | 0.08364800  |
| C | -1.86095000 | 0.26260800  | 0.05593800  |
| C | -2.66338600 | 1.35350200  | -0.32260100 |
| C | -2.48356400 | -0.94280500 | 0.43570300  |
| C | -4.05142700 | 1.23631700  | -0.35755700 |
| H | -2.17655500 | 2.28623500  | -0.59278200 |
| C | -3.87423300 | -1.04392700 | 0.41850400  |
| H | -1.88351700 | -1.78589600 | 0.75547100  |
| C | -4.66415800 | 0.03646800  | 0.01483300  |

|   |             |             |             |
|---|-------------|-------------|-------------|
| H | -4.65507800 | 2.08641400  | -0.66420300 |
| H | -4.34291100 | -1.97671100 | 0.72141300  |
| H | -5.74680900 | -0.05398900 | -0.00141500 |
| F | 0.15766200  | -1.67973800 | -0.35320600 |

### (E)-2-F

|   |             |             |             |
|---|-------------|-------------|-------------|
| C | -2.75779700 | 0.40051800  | 0.46035100  |
| C | -1.47239500 | 0.35934300  | -0.10547400 |
| C | -1.02584900 | -0.81857300 | -0.72804200 |
| C | -1.85175200 | -1.93973300 | -0.76883400 |
| C | -3.12154600 | -1.90113800 | -0.18508400 |
| C | -3.57259400 | -0.72951800 | 0.42837100  |
| H | -3.10976800 | 1.31312400  | 0.92896600  |
| H | -0.04616100 | -0.85311600 | -1.18997700 |
| H | -1.50369700 | -2.84403100 | -1.25968400 |
| H | -3.75950000 | -2.78025700 | -0.21354800 |
| H | -4.56089800 | -0.69331400 | 0.87769000  |
| C | -0.62123400 | 1.56621900  | -0.05280900 |
| F | -1.37394000 | 2.70006300  | -0.01287500 |
| N | 0.62560100  | 1.75178300  | -0.05132900 |
| C | 1.57697800  | 0.71687400  | 0.05344200  |
| C | 1.63248500  | -0.11154700 | 1.18630600  |
| C | 2.54101900  | 0.57522400  | -0.95559200 |
| C | 2.62769500  | -1.08285000 | 1.29097100  |
| H | 0.89576300  | 0.01591600  | 1.97400300  |
| C | 3.52324600  | -0.41018200 | -0.84833200 |
| H | 2.50298400  | 1.23226900  | -1.81979400 |
| C | 3.57250100  | -1.24311500 | 0.27316100  |
| H | 2.66169100  | -1.71851700 | 2.17204200  |
| H | 4.25706000  | -0.52107500 | -1.64245900 |
| H | 4.34423100  | -2.00319200 | 0.35732500  |

### TS1-F-(Z)-exo

|   |             |             |             |
|---|-------------|-------------|-------------|
| C | -0.26711700 | -1.04045500 | -0.97620700 |
| C | 1.38765200  | 0.63160900  | -1.05046300 |
| C | -0.89330400 | 1.31906400  | -0.81378700 |
| C | -2.26779000 | 0.95521100  | -0.86383200 |
| C | -0.47785100 | 2.65042500  | -0.53550500 |
| C | -3.20881600 | 1.94431800  | -0.56124200 |
| C | -1.47800700 | 3.60306300  | -0.25952700 |
| C | -2.81730000 | 3.24901500  | -0.26002700 |
| H | -4.26357000 | 1.69659900  | -0.54554900 |
| H | -1.20198800 | 4.62518600  | -0.03032200 |
| H | -3.57174600 | 3.99409000  | -0.02532400 |
| C | -2.65242400 | -0.41624800 | -1.22142700 |
| C | -3.97951900 | -0.79872200 | -1.48995600 |
| C | -1.63368700 | -1.39127400 | -1.30678100 |
| C | -4.29300200 | -2.11579400 | -1.80470500 |
| H | -4.77588900 | -0.06279100 | -1.46134600 |
| C | -1.96095100 | -2.72155200 | -1.62919600 |
| C | -3.27901100 | -3.08326800 | -1.87104800 |
| H | -5.32446600 | -2.39090700 | -2.00599900 |
| H | -3.52219800 | -4.11260300 | -2.12006900 |
| C | 0.94198700  | 2.97919500  | -0.52319600 |
| C | 1.45630200  | 4.26322100  | -0.25156600 |
| C | 1.86594900  | 1.93601100  | -0.80712900 |
| C | 2.82392400  | 4.49700800  | -0.26087400 |
| H | 0.78755800  | 5.08769800  | -0.03175700 |
| C | 3.25970500  | 2.18967500  | -0.81805900 |
| C | 3.73238500  | 3.45789400  | -0.54302700 |

|   |             |             |             |   |             |             |             |
|---|-------------|-------------|-------------|---|-------------|-------------|-------------|
| H | 3.19627600  | 5.49516600  | -0.04881600 | C | 3.62496500  | 3.56542900  | -0.58025000 |
| H | 4.80029000  | 3.65558200  | -0.54480400 | H | 3.01653700  | 5.60266700  | -0.18850100 |
| N | 0.08308400  | 0.32804800  | -1.03568700 | H | 4.68535500  | 3.79828200  | -0.57668900 |
| H | 2.06603400  | -0.17361200 | -1.29095100 | N | 0.08522400  | 0.31489800  | -0.97776600 |
| H | 0.49972200  | -1.66491000 | -1.42459400 | H | 2.08591300  | -0.13957400 | -1.17432500 |
| H | 3.94109500  | 1.37119600  | -1.03182300 | H | 0.54918600  | -1.67110500 | -1.33334100 |
| H | -1.16891600 | -3.46250100 | -1.67703500 | H | 3.90163900  | 1.46345600  | -0.96555200 |
| C | 0.20558500  | -1.53778300 | 0.90314100  | H | -1.03134800 | -3.54643400 | -1.52026200 |
| C | -0.86485700 | -0.88797700 | 1.71924500  | C | 0.17715400  | -1.44584800 | 0.80746000  |
| C | -2.12299600 | -1.48823600 | 1.87372300  | C | -0.84104300 | -0.79871500 | 1.73158300  |
| C | -0.64201600 | 0.38144200  | 2.27575700  | C | -2.08642700 | -1.39735400 | 1.96400700  |
| C | -3.14092800 | -0.82480600 | 2.56051500  | C | -0.57201200 | 0.45235400  | 2.30232200  |
| H | -2.30520900 | -2.46759600 | 1.44722600  | C | -3.04830600 | -0.75060400 | 2.74259100  |
| C | -1.66168300 | 1.04315000  | 2.95731200  | H | -2.30208200 | -2.36777300 | 1.53234100  |
| H | 0.33327400  | 0.84079700  | 2.16045900  | C | -1.53538800 | 1.10164500  | 3.07506800  |
| C | -2.91819600 | 0.44536800  | 3.09720400  | H | 0.39695900  | 0.90731000  | 2.13127100  |
| H | -4.11219500 | -1.30059000 | 2.66867300  | C | -2.77977800 | 0.50427700  | 3.29435900  |
| H | -1.47686200 | 2.02993800  | 3.37370800  | H | -4.00975400 | -1.22809600 | 2.91398900  |
| H | -3.71525000 | 0.96425800  | 3.62332300  | H | -1.31393900 | 2.07594500  | 3.50331100  |
| F | -0.08953800 | -2.91378800 | 0.73509800  | H | -3.53218400 | 1.01069400  | 3.89360700  |
| C | 2.58207000  | -1.81069400 | 0.63561000  | F | -0.10916400 | -2.86944900 | 0.80777600  |
| C | 2.63077300  | -3.01339100 | -0.11707300 | C | 2.56556600  | -1.76100400 | 0.62926600  |
| C | 3.82150700  | -1.17707400 | 0.91562000  | C | 2.59782500  | -2.97091600 | -0.12400600 |
| C | 3.85085500  | -3.53233300 | -0.55653300 | C | 3.82987200  | -1.15237000 | 0.88868100  |
| H | 1.71599300  | -3.54256500 | -0.34731300 | C | 3.80488400  | -3.50824100 | -0.57814400 |
| C | 5.02967300  | -1.70457700 | 0.47547600  | H | 1.67613800  | -3.49994300 | -0.32690200 |
| H | 3.79652600  | -0.25144000 | 1.48475200  | C | 5.02209500  | -1.69808700 | 0.43183200  |
| C | 5.05783500  | -2.89166300 | -0.26904900 | H | 3.83022500  | -0.22743300 | 1.46071600  |
| H | 3.85204600  | -4.45587800 | -1.13181500 | C | 5.02706000  | -2.88732100 | -0.31293800 |
| H | 5.95707200  | -1.18771600 | 0.71237200  | H | 3.78270500  | -4.43580300 | -1.14765500 |
| H | 6.00095500  | -3.30635400 | -0.61442500 | H | 5.95992700  | -1.19369200 | 0.65694600  |
| N | 1.45646200  | -1.15888900 | 1.10785700  | H | 5.95935100  | -3.31667400 | -0.66969400 |
|   |             |             |             | N | 1.46741000  | -1.09902200 | 1.11930300  |

### INT-F-(Z)-exo

|   |             |             |             |
|---|-------------|-------------|-------------|
| C | -0.19886300 | -1.10164000 | -0.77986800 |
| C | 1.37562500  | 0.64824100  | -0.97188100 |
| C | -0.92409400 | 1.27533400  | -0.82274100 |
| C | -2.28117900 | 0.86340300  | -0.89492200 |
| C | -0.56175400 | 2.63065100  | -0.59722300 |
| C | -3.26147600 | 1.82690700  | -0.65382100 |
| C | -1.59889600 | 3.56019700  | -0.38459400 |
| C | -2.92377900 | 3.15814700  | -0.39575000 |
| H | -4.30705900 | 1.54168400  | -0.65532300 |
| H | -1.36304700 | 4.60092000  | -0.19766000 |
| H | -3.70976800 | 3.88360200  | -0.20910000 |
| C | -2.60284400 | -0.53266200 | -1.23225600 |
| C | -3.89613100 | -0.94306800 | -1.60426600 |
| C | -1.56987900 | -1.48843900 | -1.21169200 |
| C | -4.15802300 | -2.27103900 | -1.92308000 |
| H | -4.70255800 | -0.21974400 | -1.65980500 |
| C | -1.83818000 | -2.82139500 | -1.54751400 |
| C | -3.12593600 | -3.21660400 | -1.89527400 |
| H | -5.16416900 | -2.56802000 | -2.20553300 |
| H | -3.32498400 | -4.25317300 | -2.15234900 |
| C | 0.84641400  | 3.00307600  | -0.57499100 |
| C | 1.31729800  | 4.31328200  | -0.35637800 |
| C | 1.81018900  | 1.98079500  | -0.79593200 |
| C | 2.67803000  | 4.58464000  | -0.35892400 |
| H | 0.62187800  | 5.12653500  | -0.18449600 |
| C | 3.19519800  | 2.27197600  | -0.80168100 |

### TS2-F-(Z)-exo

|   |             |             |             |
|---|-------------|-------------|-------------|
| C | -0.48401700 | -1.01567400 | -1.01408900 |
| C | 1.32229400  | 0.42044800  | -1.09561900 |
| C | -0.85747000 | 1.41233200  | -0.81542800 |
| C | -2.26205300 | 1.21167900  | -0.80626700 |
| C | -0.27736200 | 2.65423500  | -0.45480400 |
| C | -3.06920700 | 2.27970200  | -0.40437200 |
| C | -1.14187000 | 3.69739300  | -0.07672700 |
| C | -2.51636600 | 3.50991800  | -0.04634700 |
| H | -4.14389300 | 2.14862400  | -0.34584300 |
| H | -0.73423300 | 4.65852200  | 0.21470200  |
| H | -3.16610200 | 4.32195700  | 0.26603300  |
| C | -2.81291300 | -0.10308800 | -1.18211800 |
| C | -4.18011400 | -0.31401500 | -1.43726400 |
| C | -1.93625500 | -1.19948000 | -1.28923300 |
| C | -4.66013400 | -1.58113500 | -1.75433800 |
| H | -4.87594500 | 0.51749700  | -1.39803800 |
| C | -2.42236600 | -2.47005800 | -1.61539500 |
| C | -3.78210100 | -2.66767300 | -1.83937300 |
| H | -5.72074700 | -1.72091700 | -1.94436900 |
| H | -4.15522400 | -3.65691700 | -2.08888100 |
| C | 1.18125800  | 2.79342100  | -0.45855400 |
| C | 1.85312300  | 3.98961200  | -0.14330000 |
| C | 1.96637800  | 1.66534000  | -0.81052400 |
| C | 3.24113800  | 4.05654800  | -0.17367100 |
| H | 1.29360100  | 4.87832700  | 0.12594300  |

|   |             |             |             |   |             |             |             |
|---|-------------|-------------|-------------|---|-------------|-------------|-------------|
| C | 3.37299800  | 1.74866400  | -0.85441800 | H | -3.31581700 | -3.71535400 | 1.10635100  |
| C | 4.00892800  | 2.93657100  | -0.53067100 | C | -3.63404000 | -0.86570300 | -1.49416300 |
| H | 3.73458700  | 4.99199000  | 0.07509700  | C | -4.76978200 | -1.55956300 | -1.08108900 |
| H | 5.09243900  | 3.00290700  | -0.55885300 | H | -5.51611900 | -3.14200500 | 0.18291200  |
| N | -0.02805500 | 0.34693600  | -1.19215400 | H | -5.74207200 | -1.31541200 | -1.49921100 |
| H | 1.87617900  | -0.35359800 | -1.61168500 | N | 0.06644100  | -1.17826400 | -1.28878000 |
| H | 0.10887500  | -1.65996200 | -1.66856400 | H | -1.29053500 | -0.12454000 | -2.44713600 |
| H | 3.94425300  | 0.86917900  | -1.13443700 | H | 1.01034600  | 0.05912300  | -2.64825100 |
| H | -1.72648100 | -3.30167200 | -1.67749100 | H | -3.71263900 | -0.07468000 | -2.23561700 |
| C | 0.05047700  | -1.43701300 | 0.47620000  | H | 3.34410200  | 0.83430900  | -2.62080400 |
| C | -0.89187200 | -0.93595900 | 1.56210300  | C | 0.51013400  | 1.16925000  | -0.89916600 |
| C | -2.07097100 | -1.63214400 | 1.86135400  | C | 1.28399800  | 1.73733800  | 0.26951000  |
| C | -0.62725800 | 0.26885400  | 2.22526700  | C | 1.10447900  | 1.18742300  | 1.54550200  |
| C | -2.97437400 | -1.12380200 | 2.79631300  | C | 2.22968700  | 2.75294600  | 0.08826200  |
| H | -2.28238700 | -2.56926900 | 1.35942100  | C | 1.85875500  | 1.64820900  | 2.62440500  |
| C | -1.53423300 | 0.78116800  | 3.15366200  | H | 0.37619200  | 0.39610300  | 1.68663800  |
| H | 0.29200300  | 0.79797500  | 2.00284200  | C | 2.98289300  | 3.21425100  | 1.16976800  |
| C | -2.71351500 | 0.08837900  | 3.43999800  | H | 2.37183600  | 3.18320100  | -0.89621200 |
| H | -3.88421500 | -1.67553400 | 3.01875500  | C | 2.80108600  | 2.66377400  | 2.44028700  |
| H | -1.31813600 | 1.72240100  | 3.65262300  | H | 1.70876400  | 1.21334100  | 3.60908200  |
| H | -3.42126300 | 0.48727800  | 4.16222200  | H | 3.71179300  | 4.00596700  | 1.01729200  |
| F | -0.09101100 | -2.85637900 | 0.43216700  | H | 3.38904800  | 3.02288900  | 3.28087700  |
| C | 2.48772900  | -1.71818600 | 0.39299800  | F | 0.59215700  | 2.14245700  | -1.97080400 |
| C | 2.57604800  | -2.89050100 | -0.40366600 | C | -1.78825600 | 1.73816500  | -0.11982200 |
| C | 3.70447200  | -1.20500500 | 0.91387900  | C | -1.89985300 | 3.03378300  | -0.64904100 |
| C | 3.80674200  | -3.50712200 | -0.63678800 | C | -2.64733300 | 1.34890400  | 0.92097000  |
| H | 1.68039800  | -3.32168300 | -0.83089300 | C | -2.85047800 | 3.91989400  | -0.13797100 |
| C | 4.92633500  | -1.82271800 | 0.66766900  | H | -1.23735300 | 3.34189700  | -1.44777200 |
| H | 3.65265900  | -0.30578200 | 1.52132500  | C | -3.61237800 | 2.22984400  | 1.40714200  |
| C | 4.99095300  | -2.98572200 | -0.10979900 | H | -2.54505500 | 0.35709800  | 1.34735100  |
| H | 3.83658900  | -4.40720000 | -1.24756900 | C | -3.71637800 | 3.52142000  | 0.88261800  |
| H | 5.83454100  | -1.39787700 | 1.08971400  | H | -2.91917500 | 4.92333800  | -0.55034400 |
| H | 5.94321400  | -3.47413000 | -0.29837700 | H | -4.27191600 | 1.91109200  | 2.21011000  |
| N | 1.35832000  | -0.95758200 | 0.65025700  | H | -4.46108400 | 4.21150700  | 1.27006500  |
|   |             |             |             | N | -0.82288700 | 0.80800800  | -0.59244600 |

### PRO-F-(Z)

|   |             |             |             |
|---|-------------|-------------|-------------|
| C | 1.07566900  | -0.15790600 | -1.57754300 |
| C | -1.17036300 | -0.41490100 | -1.39497000 |
| C | 0.23420200  | -1.92270300 | -0.10103700 |
| C | 1.53681400  | -2.16674100 | 0.40072400  |
| C | -0.90017200 | -2.45988700 | 0.55536800  |
| C | 1.67436800  | -2.93210200 | 1.56658800  |
| C | -0.70963600 | -3.21985000 | 1.71976500  |
| C | 0.56445800  | -3.45704900 | 2.22383100  |
| H | 2.66066200  | -3.09155400 | 1.98888100  |
| H | -1.57141200 | -3.60457100 | 2.25494000  |
| H | 0.69274800  | -4.03299300 | 3.13551200  |
| C | 2.70081200  | -1.56947100 | -0.28511800 |
| C | 4.02929000  | -1.94662200 | -0.01694300 |
| C | 2.47670700  | -0.56776500 | -1.24502700 |
| C | 5.09543500  | -1.31749100 | -0.65518600 |
| H | 4.23729400  | -2.74429700 | 0.68868500  |
| C | 3.54785200  | 0.05903100  | -1.88647900 |
| C | 4.85998400  | -0.30398100 | -1.58924000 |
| H | 6.11280300  | -1.62486700 | -0.42854800 |
| H | 5.68952300  | 0.18772100  | -2.08941700 |
| C | -2.24257800 | -2.18822700 | 0.00846500  |
| C | -3.39316700 | -2.89839800 | 0.39639500  |
| C | -2.38366600 | -1.17282900 | -0.95378000 |
| C | -4.64124900 | -2.58098000 | -0.13462000 |

### TS1-F-(Z)-endo

|   |             |             |             |
|---|-------------|-------------|-------------|
| C | 1.15013500  | -1.13459600 | 0.43537500  |
| C | -0.99181300 | -0.30779600 | -1.71096700 |
| C | 1.20306500  | 0.20108500  | -1.04546500 |
| C | -0.64411700 | 1.66026600  | -0.38567900 |
| C | -2.04713100 | 1.81173600  | -0.21818100 |
| C | 0.28297600  | 2.58163700  | 0.17412900  |
| C | -2.50217600 | 2.89956400  | 0.54879000  |
| C | -0.23349300 | 3.62660400  | 0.94977200  |
| C | -1.60644600 | 3.78235300  | 1.13296100  |
| H | -3.56469800 | 3.04747700  | 0.69934200  |
| H | 0.44173300  | 4.33085500  | 1.42141500  |
| H | -1.97699200 | 4.60537600  | 1.73709900  |
| C | -2.95562900 | 0.83658500  | -0.81035700 |
| C | -4.35420200 | 0.86403300  | -0.64895000 |
| C | -2.39322400 | -0.20441900 | -1.59803500 |
| C | -5.15810300 | -0.09365600 | -1.25067300 |
| H | -4.82091900 | 1.63043600  | -0.04084900 |
| C | -3.22602100 | -1.17171500 | -2.21007300 |
| C | -4.59563600 | -1.11364000 | -2.04118100 |
| H | -6.23406200 | -0.05419300 | -1.10704200 |
| H | -5.23596200 | -1.85801800 | -2.50513500 |
| C | 1.71878400  | 2.43103900  | -0.09453200 |
| C | 2.67164500  | 3.41332500  | 0.23359900  |

|   |             |             |             |
|---|-------------|-------------|-------------|
| C | 2.15269700  | 1.26075400  | -0.75672200 |
| C | 4.01659800  | 3.23459800  | -0.07119500 |
| H | 2.36388600  | 4.33327100  | 0.71908500  |
| C | 3.51365300  | 1.09636600  | -1.07367800 |
| C | 4.44017600  | 2.07234400  | -0.73103800 |
| H | 4.73503300  | 4.00565800  | 0.19252300  |
| H | 5.48885500  | 1.93578100  | -0.98033400 |
| N | -0.15628800 | 0.56904200  | -1.13220200 |
| H | 1.47931100  | -0.47310200 | -1.84940900 |
| H | -0.53308200 | -1.08995900 | -2.29895000 |
| C | -1.13394200 | -1.78239600 | 0.95731700  |
| C | -1.50533000 | -0.82173200 | 1.93480700  |
| C | -2.76151300 | -0.86622400 | 2.53996700  |
| H | -0.81565100 | -0.03654500 | 2.20850300  |
| C | -3.69739700 | -1.84884400 | 2.20715000  |
| H | -3.01172500 | -0.10816400 | 3.27945100  |
| H | -4.67384000 | -1.87010400 | 2.68342800  |
| C | 2.48491200  | -1.79679700 | 0.25770800  |
| C | 4.99029600  | -2.99849300 | -0.16048500 |
| C | 4.84611400  | -1.98354900 | 0.78659400  |
| H | 5.70346000  | -1.65302000 | 1.36732600  |
| C | 3.60286500  | -1.37922600 | 0.99116000  |
| H | 3.49992600  | -0.58296100 | 1.71862300  |
| H | 5.95926500  | -3.46321000 | -0.32286400 |
| H | 3.83056400  | 0.19430300  | -1.58808600 |
| H | -2.76916100 | -1.96068700 | -2.80079400 |
| N | 0.06816100  | -1.87995200 | 0.27915000  |
| F | 1.21743500  | -0.23034100 | 1.52200300  |
| C | -3.35062800 | -2.80272800 | 1.24271800  |
| H | -4.06188400 | -3.57537300 | 0.95910000  |
| C | 3.87683700  | -3.41521600 | -0.89892400 |
| H | 3.97711800  | -4.20815100 | -1.63577600 |
| C | 2.63308400  | -2.82242600 | -0.68871700 |
| H | 1.76369100  | -3.15223400 | -1.24855300 |
| C | -2.10189600 | -2.76876600 | 0.63325300  |
| H | -1.83573900 | -3.50843500 | -0.11744300 |

**TS1-F-(E)-exo**

|   |             |             |             |
|---|-------------|-------------|-------------|
| C | 0.79752800  | 0.72465700  | -0.85021100 |
| C | -1.69372100 | 0.27639800  | 0.85959600  |
| C | 0.59286200  | -0.26740800 | 0.92365000  |
| C | -1.05336400 | -1.93701500 | 0.21408700  |
| C | -2.36634400 | -2.19215300 | -0.26616200 |
| C | -0.03376400 | -2.92745600 | 0.17136800  |
| C | -2.62611800 | -3.45917900 | -0.82427700 |
| C | -0.35271400 | -4.16021200 | -0.40731800 |
| C | -1.63158200 | -4.42061200 | -0.90018400 |
| H | -3.61310400 | -3.68717100 | -1.20894300 |
| H | 0.40458900  | -4.93188800 | -0.48300600 |
| H | -1.84823800 | -5.38710300 | -1.34586900 |
| C | -3.38648800 | -1.15325700 | -0.17801200 |
| C | -4.71058500 | -1.30259100 | -0.63609500 |
| C | -3.02152900 | 0.08327500  | 0.41817100  |
| C | -5.62726600 | -0.26839200 | -0.50819500 |
| H | -5.03039900 | -2.23076300 | -1.09593300 |
| C | -3.96707000 | 1.12877100  | 0.54776400  |
| C | -5.25709100 | 0.95419700  | 0.08427500  |
| H | -6.64235800 | -0.40667900 | -0.86944500 |
| H | -5.98414400 | 1.75576800  | 0.17664500  |
| C | 1.28792500  | -2.64217400 | 0.74788600  |

|   |             |             |             |
|---|-------------|-------------|-------------|
| C | 2.27812200  | -3.62500900 | 0.92984700  |
| C | 1.56157800  | -1.31931300 | 1.16408300  |
| C | 3.50722100  | -3.30726900 | 1.49882500  |
| H | 2.08771800  | -4.65241900 | 0.63873400  |
| C | 2.80330700  | -1.01225200 | 1.75001200  |
| C | 3.77021000  | -1.99485100 | 1.91519100  |
| H | 4.25681100  | -4.08276800 | 1.62870000  |
| H | 4.72624400  | -1.74524600 | 2.36707700  |
| N | -0.75402100 | -0.67359200 | 0.75937900  |
| H | 0.66492200  | 0.58836700  | 1.58557300  |
| H | -1.40748800 | 1.18149500  | 1.37429900  |
| C | -0.26616200 | 2.80508200  | -0.18664200 |
| C | 0.50649900  | 3.18856600  | 0.94061000  |
| C | 0.24788400  | 4.38067400  | 1.61933200  |
| H | 1.32431200  | 2.56025800  | 1.27555000  |
| C | -0.77907600 | 5.23452000  | 1.21043000  |
| H | 0.86229600  | 4.64228300  | 2.47807900  |
| H | -0.97228700 | 6.16198900  | 1.74236700  |
| C | 2.27226100  | 0.96957000  | -1.03402100 |
| C | 5.03153000  | 1.34899800  | -1.46945500 |
| C | 4.48715000  | 0.06278700  | -1.48470400 |
| H | 5.12398700  | -0.79992800 | -1.66166500 |
| C | 3.12175300  | -0.12440800 | -1.27527000 |
| H | 2.70788400  | -1.12452900 | -1.30326400 |
| H | 6.09632100  | 1.49625500  | -1.63015500 |
| H | 3.00041200  | 0.00969700  | 2.06223600  |
| H | -3.65653400 | 2.06580100  | 1.00122400  |
| N | -0.17971200 | 1.61882700  | -0.89113600 |
| F | 0.45444400  | -0.37150800 | -1.67085800 |
| C | -1.55601200 | 4.87188100  | 0.10229800  |
| H | -2.36277500 | 5.52028800  | -0.23204500 |
| C | 4.19167800  | 2.44552400  | -1.26337600 |
| H | 4.59617400  | 3.45424300  | -1.27744000 |
| C | 2.82371900  | 2.25958200  | -1.05622000 |
| H | 2.18856200  | 3.12677600  | -0.93038800 |
| C | -1.31100600 | 3.68254400  | -0.57540800 |
| H | -1.92478300 | 3.39135100  | -1.42356700 |

**INT-F-(E)-exo**

|   |             |             |             |
|---|-------------|-------------|-------------|
| C | 0.81442700  | 0.58692900  | -0.66834000 |
| C | -1.66562200 | 0.35303500  | 0.77809500  |
| C | 0.62057900  | -0.19651800 | 0.77408900  |
| C | -1.09174100 | -1.89714400 | 0.20256800  |
| C | -2.40201700 | -2.13122800 | -0.28771900 |
| C | -0.09444700 | -2.90641900 | 0.18221100  |
| C | -2.68225400 | -3.39908000 | -0.83503000 |
| C | -0.42477800 | -4.13525400 | -0.39133300 |
| C | -1.70495700 | -4.37893700 | -0.89579600 |
| H | -3.66987300 | -3.61145200 | -1.22749500 |
| H | 0.32457900  | -4.91608800 | -0.45817900 |
| H | -1.93345700 | -5.34400600 | -1.33805400 |
| C | -3.39553000 | -1.06358900 | -0.22223300 |
| C | -4.72292800 | -1.19017700 | -0.67545400 |
| C | -3.00468100 | 0.17793600  | 0.34689600  |
| C | -5.61283700 | -0.12981000 | -0.56689700 |
| H | -5.06721000 | -2.11952100 | -1.11433400 |
| C | -3.92221800 | 1.24706000  | 0.46142500  |
| C | -5.21722800 | 1.09497000  | 0.00163100  |
| H | -6.63142800 | -0.25206500 | -0.92424000 |
| H | -5.92675900 | 1.91310000  | 0.08068400  |

|   |             |             |             |
|---|-------------|-------------|-------------|
| C | 1.22060200  | -2.63547700 | 0.78822400  |
| C | 2.14003000  | -3.65510900 | 1.09633700  |
| C | 1.55267300  | -1.30867800 | 1.11947500  |
| C | 3.35744400  | -3.35967300 | 1.70239700  |
| H | 1.89745900  | -4.69062400 | 0.88184200  |
| C | 2.76737000  | -1.02226100 | 1.75267600  |
| C | 3.67398800  | -2.03870400 | 2.03817600  |
| H | 4.05305100  | -4.16277300 | 1.92931300  |
| H | 4.61719400  | -1.80612800 | 2.52421600  |
| N | -0.77031300 | -0.64100900 | 0.73456400  |
| H | 0.69482800  | 0.58657200  | 1.52942300  |
| H | -1.38119500 | 1.24092900  | 1.32353200  |
| C | -0.17788700 | 2.75394900  | -0.10487500 |
| C | 0.63446300  | 3.13432800  | 1.00350900  |
| C | 0.41928700  | 4.33393000  | 1.68648000  |
| H | 1.46315700  | 2.50513600  | 1.31008800  |
| C | -0.60599100 | 5.20562800  | 1.31638100  |
| H | 1.07060600  | 4.58595400  | 2.52115800  |
| H | -0.76571300 | 6.13678700  | 1.85290600  |
| C | 2.28425100  | 0.86857600  | -1.00616600 |
| C | 4.97734500  | 1.28089500  | -1.73863600 |
| C | 4.46060900  | -0.01460600 | -1.65602800 |
| H | 5.09232900  | -0.87168800 | -1.87466100 |
| C | 3.12747700  | -0.21642500 | -1.30204300 |
| H | 2.73406100  | -1.22476100 | -1.26684300 |
| H | 6.01691400  | 1.44092800  | -2.01278800 |
| H | 3.00345700  | 0.00772300  | 2.00565900  |
| H | -3.58800400 | 2.18312100  | 0.89914700  |
| N | -0.13746200 | 1.58583600  | -0.82238700 |
| F | 0.44330400  | -0.44093800 | -1.60423400 |
| C | -1.42266300 | 4.85311400  | 0.23065600  |
| H | -2.22783000 | 5.51576700  | -0.08037300 |
| C | 4.13937100  | 2.36726200  | -1.48552800 |
| H | 4.51778800  | 3.38240100  | -1.57353100 |
| C | 2.80225200  | 2.16314700  | -1.13305400 |
| H | 2.16753600  | 3.02379800  | -0.97049800 |
| C | -1.21754900 | 3.66493500  | -0.45738200 |
| H | -1.85783500 | 3.39190000  | -1.29238500 |

**TS2-F-(E)-exo**

|   |             |             |             |
|---|-------------|-------------|-------------|
| C | 0.73054400  | 0.62759800  | -0.57920300 |
| C | -1.58461200 | 0.17958600  | 0.79549900  |
| C | 0.70500900  | -0.21598400 | 0.82492700  |
| C | -0.85460800 | -2.03880800 | 0.21706100  |
| C | -2.13689400 | -2.35837000 | -0.29374000 |
| C | 0.22029100  | -2.96236100 | 0.16085900  |
| C | -2.31926800 | -3.63078300 | -0.86757800 |
| C | -0.01444800 | -4.20297800 | -0.43721400 |
| C | -1.27228500 | -4.53677200 | -0.94283500 |
| H | -3.28572200 | -3.90610100 | -1.27362500 |
| H | 0.79495300  | -4.91899500 | -0.52662500 |
| H | -1.42777400 | -5.50758000 | -1.40391900 |
| C | -3.20765700 | -1.36178000 | -0.22536100 |
| C | -4.52022800 | -1.58799700 | -0.68204400 |
| C | -2.91462400 | -0.09968400 | 0.34942900  |
| C | -5.49184700 | -0.60050900 | -0.57273100 |
| H | -4.79074000 | -2.54000900 | -1.12460100 |
| C | -3.91183800 | 0.88950700  | 0.47167000  |
| C | -5.19321500 | 0.64392300  | 0.00603700  |
| H | -6.49697100 | -0.80030700 | -0.93361500 |

|   |             |             |             |
|---|-------------|-------------|-------------|
| H | -5.96324400 | 1.40460800  | 0.09409700  |
| C | 1.52521400  | -2.58900700 | 0.73647600  |
| C | 2.54508600  | -3.52711100 | 0.98251500  |
| C | 1.75204700  | -1.24602500 | 1.09255700  |
| C | 3.75420500  | -3.13762100 | 1.55112300  |
| H | 2.39034100  | -4.57446800 | 0.74570300  |
| C | 2.95954700  | -0.86641200 | 1.68913400  |
| C | 3.96510100  | -1.80250400 | 1.91216700  |
| H | 4.52752200  | -3.87996600 | 1.72836300  |
| H | 4.90225800  | -1.49747100 | 2.36893000  |
| N | -0.63761800 | -0.78656300 | 0.80985800  |
| H | 0.73502600  | 0.54215100  | 1.61010900  |
| H | -1.42335300 | 1.00752300  | 1.47365100  |
| C | -0.54890900 | 2.66274300  | -0.01065000 |
| C | 0.20426100  | 3.15210400  | 1.08944900  |
| C | -0.11867400 | 4.36272800  | 1.70554500  |
| H | 1.06965200  | 2.60187200  | 1.44324200  |
| C | -1.20560400 | 5.12434000  | 1.27116700  |
| H | 0.48987000  | 4.70959300  | 2.53789900  |
| H | -1.45169300 | 6.06466500  | 1.75670900  |
| C | 2.11320300  | 1.17156700  | -0.95493800 |
| C | 4.68402000  | 2.01658300  | -1.76205200 |
| C | 4.38663900  | 0.65464600  | -1.67102900 |
| H | 5.14197600  | -0.08904700 | -1.91110900 |
| C | 3.11431700  | 0.23922800  | -1.28228300 |
| H | 2.89071200  | -0.81948800 | -1.24759200 |
| H | 5.67543600  | 2.34371600  | -2.06446700 |
| H | 3.11024700  | 0.17393000  | 1.96420000  |
| H | -3.65582000 | 1.84247200  | 0.92455200  |
| N | -0.40436300 | 1.44352800  | -0.65266600 |
| F | 0.50144800  | -0.41015000 | -1.54852300 |
| C | -1.96934100 | 4.65497400  | 0.19448500  |
| H | -2.81872200 | 5.23298600  | -0.16279100 |
| C | 3.68713300  | 2.95101600  | -1.48205400 |
| H | 3.89129000  | 4.01432800  | -1.57728100 |
| C | 2.41156700  | 2.53306600  | -1.09173500 |
| H | 1.65451600  | 3.28256800  | -0.90943800 |
| C | -1.64997000 | 3.45398100  | -0.43015200 |
| H | -2.24390100 | 3.08831700  | -1.26306500 |

**PRO-F-(E)**

|   |             |             |             |
|---|-------------|-------------|-------------|
| C | -0.73524000 | 0.72922200  | 0.07537100  |
| C | 1.07662600  | -0.20716500 | -1.19897800 |
| C | -1.18672400 | -0.30853100 | -1.00699100 |
| C | 0.09606500  | -2.18139700 | -0.12722300 |
| C | 1.36565400  | -2.60911100 | 0.32436600  |
| C | -1.08507300 | -2.78521800 | 0.37387200  |
| C | 1.43139800  | -3.63345700 | 1.28260400  |
| C | -0.96689900 | -3.80687400 | 1.32414100  |
| C | 0.27947700  | -4.23181700 | 1.77851800  |
| H | 2.39637100  | -3.94855600 | 1.66448800  |
| H | -1.86241600 | -4.25325900 | 1.74340600  |
| H | 0.34940900  | -5.01351500 | 2.52919400  |
| C | 2.57558700  | -1.98441700 | -0.24015900 |
| C | 3.86115500  | -2.53607700 | -0.08855700 |
| C | 2.43806000  | -0.82026300 | -1.01845200 |
| C | 4.97120000  | -1.94441400 | -0.68534800 |
| H | 3.99832600  | -3.44983100 | 0.47990800  |
| C | 3.54989400  | -0.25742400 | -1.65130900 |

|   |             |             |             |
|---|-------------|-------------|-------------|
| C | 4.81983200  | -0.80462100 | -1.47948300 |
| H | 5.95343500  | -2.38923100 | -0.54990700 |
| H | 5.67860000  | -0.35531100 | -1.96989000 |
| C | -2.40105800 | -2.28582900 | -0.07294000 |
| C | -3.60389200 | -2.98121800 | 0.14252400  |
| C | -2.45989500 | -1.04746100 | -0.73647400 |
| C | -4.82486300 | -2.43876100 | -0.25322100 |
| H | -3.59125800 | -3.95818600 | 0.61473500  |
| C | -3.68429000 | -0.50754400 | -1.13667000 |
| C | -4.87218700 | -1.19426200 | -0.88811200 |
| H | -5.74146600 | -2.99395000 | -0.07262400 |
| H | -5.82278500 | -0.77069700 | -1.19963600 |
| N | -0.00846400 | -1.17755100 | -1.12047100 |
| H | -1.27344300 | 0.24704400  | -1.94689700 |
| H | 1.02590700  | 0.26371200  | -2.18926500 |
| C | 1.46573800  | 1.83794800  | 0.35566900  |
| C | 2.32127900  | 2.58699700  | -0.46595600 |
| C | 3.10189700  | 3.60849700  | 0.07754200  |
| H | 2.35620300  | 2.38596500  | -1.53071900 |
| C | 3.01585800  | 3.91952100  | 1.43665300  |
| H | 3.76422500  | 4.17597300  | -0.57129400 |
| H | 3.61786300  | 4.72153000  | 1.85489400  |
| C | -1.49968500 | 2.03328800  | 0.01817700  |
| C | -2.99352600 | 4.39472800  | -0.22049500 |
| C | -3.24872700 | 3.50414600  | 0.82392100  |
| H | -4.02712900 | 3.72321500  | 1.55000200  |
| C | -2.50779700 | 2.32559300  | 0.94262000  |
| H | -2.70980600 | 1.63253200  | 1.75062900  |
| H | -3.57077300 | 5.31103300  | -0.31088800 |
| H | -3.70090000 | 0.45230500  | -1.64607000 |
| H | 3.41781300  | 0.60880300  | -2.29186500 |
| N | 0.66277600  | 0.80219400  | -0.16229200 |
| F | -0.98979700 | 0.13984900  | 1.35957800  |
| C | 2.14345000  | 3.19236800  | 2.25226500  |
| H | 2.06410800  | 3.42606400  | 3.31092100  |
| C | -1.99034300 | 4.10252900  | -1.14985400 |
| H | -1.78280800 | 4.79107700  | -1.96459500 |
| C | -1.24786500 | 2.92841100  | -1.03082200 |
| H | -0.46303900 | 2.70678700  | -1.74826600 |
| C | 1.38353900  | 2.15032200  | 1.72327600  |
| H | 0.71967900  | 1.56910300  | 2.35404000  |

### TS1-F-(E)-endo

|   |             |             |             |
|---|-------------|-------------|-------------|
| C | 1.06503600  | -0.40579700 | -1.61311500 |
| C | -1.26914300 | -0.56034600 | -1.79434700 |
| C | -0.18722700 | -1.84548900 | -0.07691400 |
| C | 1.03017600  | -2.36640300 | 0.44456000  |
| C | -1.44745200 | -2.17101700 | 0.49295700  |
| C | 0.94627200  | -3.20404100 | 1.56458300  |
| C | -1.46262600 | -3.03098700 | 1.60619200  |
| C | -0.28243800 | -3.53319400 | 2.13360300  |
| H | 1.85130100  | -3.60379100 | 2.00639600  |
| H | -2.40649700 | -3.30725200 | 2.06081700  |
| H | -0.31419400 | -4.18899300 | 2.99880500  |
| C | 2.31279200  | -2.00390100 | -0.17482100 |
| C | 3.54612500  | -2.56031100 | 0.21523900  |
| C | 2.30475900  | -1.02773600 | -1.19612500 |
| C | 4.73571200  | -2.14287100 | -0.36931500 |
| H | 3.58217700  | -3.32903700 | 0.97968800  |
| C | 3.51621700  | -0.60412000 | -1.77502200 |

|   |             |             |             |
|---|-------------|-------------|-------------|
| C | 4.72175900  | -1.15320600 | -1.36439300 |
| H | 5.67593300  | -2.58456400 | -0.05156600 |
| H | 5.65219600  | -0.81890300 | -1.81512700 |
| C | -2.66563400 | -1.60312300 | -0.07464800 |
| C | -3.94715100 | -1.78003900 | 0.48229900  |
| C | -2.54923000 | -0.83088700 | -1.26138700 |
| C | -5.06544000 | -1.21830800 | -0.11654900 |
| H | -4.07213400 | -2.34697600 | 1.39803200  |
| C | -3.70006100 | -0.27347000 | -1.86771000 |
| C | -4.94501000 | -0.46606800 | -1.30034100 |
| H | -6.04287200 | -1.36039200 | 0.33552500  |
| H | -5.82717900 | -0.02884000 | -1.75871700 |
| N | -0.14238800 | -0.99864500 | -1.20348200 |
| H | -1.14767900 | -0.01942400 | -2.72039800 |
| H | 1.02231300  | -0.10537300 | -2.65253300 |
| H | -3.58359800 | 0.32102500  | -2.76940100 |
| H | 3.48825100  | 0.17388500  | -2.53246100 |
| C | 0.85245600  | 1.57483100  | -1.06972500 |
| C | 1.76012600  | 1.89081800  | 0.09076600  |
| C | 2.47195600  | 3.10176400  | 0.04638800  |
| C | 1.91165600  | 1.06700300  | 1.21215400  |
| C | 3.29545200  | 3.48376800  | 1.10483300  |
| H | 2.37493400  | 3.74299300  | -0.82325000 |
| C | 2.74076900  | 1.44586100  | 2.26959400  |
| H | 1.39830000  | 0.11642200  | 1.26259400  |
| C | 3.43444600  | 2.65609400  | 2.22240300  |
| H | 3.83228300  | 4.42758600  | 1.05378600  |
| H | 2.84673300  | 0.78604700  | 3.12666300  |
| H | 4.08083500  | 2.94993600  | 3.04520700  |
| F | 1.52951700  | 2.00679000  | -2.24870700 |
| C | -1.35367800 | 2.01271200  | -0.13299500 |
| C | -1.35888600 | 1.34413500  | 1.11126200  |
| C | -2.45136700 | 2.85968400  | -0.41676600 |
| C | -2.39332300 | 1.53801600  | 2.02674800  |
| H | -0.57458000 | 0.63861800  | 1.34378600  |
| C | -3.47705500 | 3.05445800  | 0.50371800  |
| H | -2.47035100 | 3.36184100  | -1.38044100 |
| C | -3.45735300 | 2.39551200  | 1.73829500  |
| H | -2.37112100 | 0.99587000  | 2.96953300  |
| H | -4.30177700 | 3.71780000  | 0.25317200  |
| H | -4.26191300 | 2.53848800  | 2.45455000  |
| N | -0.42801500 | 1.85605500  | -1.15577900 |

### (Z)-2-Cl

|   |             |             |             |
|---|-------------|-------------|-------------|
| C | -3.61758900 | -1.72572500 | 0.19765300  |
| C | -2.27285800 | -1.38234600 | 0.10649900  |
| C | -1.88820500 | -0.03066000 | 0.00125200  |
| C | -2.88040500 | 0.96204100  | -0.00594400 |
| C | -4.22683200 | 0.61069900  | 0.09203200  |
| C | -4.60056400 | -0.73034800 | 0.19192400  |
| H | -3.89987400 | -2.77217400 | 0.27140400  |
| H | -1.50849900 | -2.15164400 | 0.10948300  |
| H | -2.60789900 | 2.00807500  | -0.07981300 |
| H | -4.98316700 | 1.39038500  | 0.09001800  |
| H | -5.65053800 | -1.00033800 | 0.26387200  |
| C | -0.44083100 | 0.26897800  | -0.08060900 |
| N | 0.45261700  | -0.58778400 | 0.13202000  |
| C | 1.84633000  | -0.43640500 | 0.11672100  |
| C | 2.59833800  | -1.32971600 | -0.66203400 |
| C | 2.50087500  | 0.51262800  | 0.91863200  |



|    |             |             |             |
|----|-------------|-------------|-------------|
| C  | 3.98957400  | -1.24199900 | -0.67206400 |
| H  | 2.08087200  | -2.07422000 | -1.25994000 |
| C  | 3.89408900  | 0.57554000  | 0.91822200  |
| H  | 1.91678800  | 1.17997700  | 1.54354400  |
| C  | 4.64329400  | -0.29207500 | 0.11861600  |
| H  | 4.56424300  | -1.92581100 | -1.29097300 |
| H  | 4.39442500  | 1.30881200  | 1.54513200  |
| H  | 5.72819300  | -0.23450400 | 0.11829400  |
| Cl | -0.02789200 | 1.98954500  | -0.56944400 |

**(E)-2-Cl**

|    |             |             |             |
|----|-------------|-------------|-------------|
| C  | -2.45265400 | -0.37512000 | 0.69406700  |
| C  | -1.34829000 | -0.05040200 | -0.10795500 |
| C  | -0.82920000 | -1.00603700 | -0.99747900 |
| C  | -1.40971300 | -2.27018100 | -1.07784100 |
| C  | -2.49888700 | -2.59611900 | -0.26487100 |
| C  | -3.01624000 | -1.64810000 | 0.62201200  |
| H  | -2.86086700 | 0.36238400  | 1.37770400  |
| H  | 0.01809100  | -0.75498700 | -1.62667100 |
| H  | -1.01072000 | -3.00009400 | -1.77637600 |
| H  | -2.94583100 | -3.58454000 | -0.32571300 |
| H  | -3.86318500 | -1.89699500 | 1.25498400  |
| C  | -0.70093500 | 1.28238400  | -0.03142100 |
| N  | 0.51423600  | 1.61321700  | -0.02583600 |
| C  | 1.58334800  | 0.69523100  | 0.08583800  |
| C  | 1.65538200  | -0.23626700 | 1.13389400  |
| C  | 2.63624600  | 0.79119200  | -0.83533500 |
| C  | 2.76407800  | -1.07526200 | 1.24009300  |
| H  | 0.84734100  | -0.29069700 | 1.85684500  |
| C  | 3.72970000  | -0.06895900 | -0.73299900 |
| H  | 2.57933200  | 1.53069100  | -1.62884000 |
| C  | 3.80039400  | -1.00301900 | 0.30463000  |
| H  | 2.81508600  | -1.79039800 | 2.05692500  |
| H  | 4.53406700  | 0.00035500  | -1.46051500 |
| H  | 4.65933900  | -1.66290000 | 0.38852200  |
| Cl | -1.87362800 | 2.65639000  | -0.00775300 |

**TS1-Cl-(Z)-exo**

|   |             |             |             |
|---|-------------|-------------|-------------|
| C | -0.45689900 | -0.96567300 | -1.07288000 |
| C | 1.39864000  | 0.49096600  | -1.20344000 |
| C | -0.75317300 | 1.44778000  | -0.79701700 |
| C | -2.16345300 | 1.26903300  | -0.79765600 |
| C | -0.15397600 | 2.69740800  | -0.48037700 |
| C | -2.95151500 | 2.34928400  | -0.39062400 |
| C | -1.00646700 | 3.75470800  | -0.10567200 |
| C | -2.37819000 | 3.57444700  | -0.04643100 |
| H | -4.02749900 | 2.23643800  | -0.33028600 |
| H | -0.58745900 | 4.71996400  | 0.15200800  |
| H | -3.01655500 | 4.39509100  | 0.26734000  |
| C | -2.73718500 | -0.01230700 | -1.22575300 |
| C | -4.10686600 | -0.18771800 | -1.49319200 |
| C | -1.86287900 | -1.11093700 | -1.39117700 |
| C | -4.60272000 | -1.42406400 | -1.89014800 |
| H | -4.79129100 | 0.64905600  | -1.40267900 |
| C | -2.37406800 | -2.35403100 | -1.80849000 |
| C | -3.73211200 | -2.51263000 | -2.04822600 |
| H | -5.66427500 | -1.54041200 | -2.08948600 |
| H | -4.11667600 | -3.47691700 | -2.36883300 |
| C | 1.29406800  | 2.84002900  | -0.53127600 |
| C | 1.98632600  | 4.02591000  | -0.21412100 |

|    |             |             |             |
|----|-------------|-------------|-------------|
| C  | 2.05622400  | 1.70686100  | -0.92820100 |
| C  | 3.37047000  | 4.08049500  | -0.29114200 |
| H  | 1.44392400  | 4.91216100  | 0.09494600  |
| C  | 3.46938700  | 1.77695900  | -1.00419200 |
| C  | 4.11836900  | 2.95369900  | -0.68624500 |
| H  | 3.88268400  | 5.00548900  | -0.04217200 |
| H  | 5.20155300  | 3.01158500  | -0.73782200 |
| N  | 0.07158000  | 0.34848400  | -1.11193500 |
| H  | 1.95558800  | -0.38404500 | -1.50667500 |
| H  | 0.21572300  | -1.67784400 | -1.53632500 |
| H  | 4.02524500  | 0.89233100  | -1.30065600 |
| H  | -1.69217200 | -3.18891000 | -1.93122700 |
| C  | 0.04624900  | -1.46252300 | 0.88196700  |
| C  | -0.97799600 | -0.72352300 | 1.68836100  |
| C  | -2.33063900 | -1.09182000 | 1.74703900  |
| C  | -0.57670600 | 0.46293900  | 2.33090900  |
| C  | -3.25555700 | -0.29188800 | 2.41847000  |
| H  | -2.66361900 | -1.99791300 | 1.25728000  |
| C  | -1.50307100 | 1.25970900  | 2.99984300  |
| H  | 0.46687800  | 0.75236500  | 2.28757400  |
| C  | -2.85044300 | 0.89036500  | 3.04103800  |
| H  | -4.29936900 | -0.59332500 | 2.44419000  |
| H  | -1.17118200 | 2.17460100  | 3.48366900  |
| H  | -3.57510500 | 1.51525100  | 3.55636200  |
| C  | 2.46170500  | -1.78546100 | 0.60403100  |
| C  | 2.55410900  | -2.83994700 | -0.33503900 |
| C  | 3.66969400  | -1.23533100 | 1.09519600  |
| C  | 3.80096100  | -3.31326900 | -0.74813300 |
| H  | 1.65413900  | -3.28520700 | -0.73816700 |
| C  | 4.90642100  | -1.71669000 | 0.67757200  |
| H  | 3.60439900  | -0.41651200 | 1.80625600  |
| C  | 4.98433700  | -2.76293200 | -0.24967600 |
| H  | 3.84300700  | -4.12362800 | -1.47255400 |
| H  | 5.81523200  | -1.27175100 | 1.07586900  |
| H  | 5.94929500  | -3.13954300 | -0.57772100 |
| N  | 1.29750200  | -1.19675000 | 1.06244000  |
| Cl | -0.47613600 | -3.40997300 | 0.79315700  |

**TS1-Cl-(Z)-endo**

|   |             |             |             |
|---|-------------|-------------|-------------|
| C | 1.09113700  | -1.18329400 | 0.42303100  |
| C | -1.01240400 | -0.20633900 | -1.67177500 |
| C | 1.19435200  | 0.24441400  | -0.99459100 |
| C | -0.61162300 | 1.78122700  | -0.39303200 |
| C | -2.00973300 | 1.98076400  | -0.23845500 |
| C | 0.34057300  | 2.69739400  | 0.13070400  |
| C | -2.43414500 | 3.10417500  | 0.49571900  |
| C | -0.14511500 | 3.78223900  | 0.86791100  |
| C | -1.51368800 | 3.97943100  | 1.05044100  |
| H | -3.49215000 | 3.28762400  | 0.63853900  |
| H | 0.55004200  | 4.48426600  | 1.31304700  |
| H | -1.86015800 | 4.83136800  | 1.62810200  |
| C | -2.94472100 | 1.02363300  | -0.81612900 |
| C | -4.34345200 | 1.10231900  | -0.67002900 |
| C | -2.41042300 | -0.05455900 | -1.57345600 |
| C | -5.17131400 | 0.15238300  | -1.24961400 |
| H | -4.79036100 | 1.90099900  | -0.08923600 |
| C | -3.26853000 | -1.01251300 | -2.16551200 |
| C | -4.63586200 | -0.90845600 | -2.00540300 |
| H | -6.24660700 | 0.22939300  | -1.11665300 |
| H | -5.29658300 | -1.64642000 | -2.45034800 |

|    |             |             |             |    |             |             |             |
|----|-------------|-------------|-------------|----|-------------|-------------|-------------|
| C  | 1.76978700  | 2.50275100  | -0.14444500 | H  | -5.50605000 | 2.92828600  | 0.13453700  |
| C  | 2.74427100  | 3.48063800  | 0.12415900  | C  | 0.68028500  | -2.87652100 | 0.84265600  |
| C  | 2.17189300  | 1.29344300  | -0.75346900 | C  | 1.42835900  | -4.04042500 | 1.09813400  |
| C  | 4.08092500  | 3.26238500  | -0.19251800 | C  | 1.23769600  | -1.62422100 | 1.18493500  |
| H  | 2.46056700  | 4.42774700  | 0.57044900  | C  | 2.69231900  | -3.96683300 | 1.67436000  |
| C  | 3.52108700  | 1.09455400  | -1.09590700 | H  | 1.01604800  | -5.01631000 | 0.86494600  |
| C  | 4.47139700  | 2.06707400  | -0.81106500 | C  | 2.50548200  | -1.56363800 | 1.79316000  |
| H  | 4.81757700  | 4.03056100  | 0.02532900  | C  | 3.23083100  | -2.72296400 | 2.03222500  |
| H  | 5.51187000  | 1.90291900  | -1.07735300 | H  | 3.25179700  | -4.87891100 | 1.86211300  |
| N  | -0.15425800 | 0.64970600  | -1.09645200 | H  | 4.21055600  | -2.66418500 | 2.49804700  |
| H  | 1.45104400  | -0.44614800 | -1.79143000 | N  | -0.88466900 | -0.51441000 | 0.74391600  |
| H  | -0.57532200 | -1.01494500 | -2.24040600 | H  | 0.77638900  | 0.43921300  | 1.52291300  |
| C  | -1.26268100 | -1.88434000 | 0.84393900  | H  | -1.14042600 | 1.44586000  | 1.33484100  |
| C  | -1.83287900 | -0.90355800 | 1.69051800  | C  | 0.33717300  | 2.83071000  | -0.04575800 |
| C  | -3.12076700 | -1.06794700 | 2.19924400  | C  | 1.22881600  | 3.00360900  | 1.04283300  |
| H  | -1.27456100 | -0.00937900 | 1.92762800  | C  | 1.21304200  | 4.17498400  | 1.80166400  |
| C  | -3.88894100 | -2.19167900 | 1.88369700  | H  | 1.94992300  | 2.22959500  | 1.28028000  |
| H  | -3.53302100 | -0.29178000 | 2.84036000  | C  | 0.32155300  | 5.20964000  | 1.50881300  |
| H  | -4.89289700 | -2.30605600 | 2.28314600  | H  | 1.91119400  | 4.27699500  | 2.62944500  |
| C  | 2.39269700  | -1.91105700 | 0.17535500  | H  | 0.31710400  | 6.11925600  | 2.10291200  |
| C  | 4.75789200  | -3.29111000 | -0.50668500 | C  | 2.46823600  | 0.61852300  | -1.00932100 |
| C  | 4.80009000  | -2.20016900 | 0.36208200  | C  | 5.26652900  | 0.64062200  | -1.35804200 |
| H  | 5.74696300  | -1.87438400 | 0.78477700  | C  | 4.58233400  | -0.56986800 | -1.21838700 |
| C  | 3.63127700  | -1.51152900 | 0.69641300  | H  | 5.12422900  | -1.51148800 | -1.24357900 |
| H  | 3.68676100  | -0.66326400 | 1.36563900  | C  | 3.19843100  | -0.58105800 | -1.05580100 |
| H  | 5.66916600  | -3.82351300 | -0.76609900 | H  | 2.67810500  | -1.52723100 | -0.98854800 |
| H  | 3.81155100  | 0.17070600  | -1.58542700 | H  | 6.34562000  | 0.64888700  | -1.48697800 |
| H  | -2.83267400 | -1.83141900 | -2.73047200 | H  | 2.91559200  | -0.59456300 | 2.06275000  |
| N  | -0.01165900 | -1.84492500 | 0.26723200  | H  | -3.15589900 | 2.76983100  | 0.94011400  |
| C  | -3.34414000 | -3.16155400 | 1.03470200  | N  | 0.19939400  | 1.69190100  | -0.82393500 |
| H  | -3.92507100 | -4.04129800 | 0.76728100  | C  | -0.56590100 | 5.05539500  | 0.43573100  |
| C  | 3.52859600  | -3.69386700 | -1.03647800 | H  | -1.26738900 | 5.84971200  | 0.19151200  |
| H  | 3.47639400  | -4.54509200 | -1.71069600 | C  | 4.54785900  | 1.83720800  | -1.35503900 |
| C  | 2.35997600  | -3.01321400 | -0.69921100 | H  | 5.06120600  | 2.78500500  | -1.49426100 |
| H  | 1.40589400  | -3.33135100 | -1.10475300 | C  | 3.16161200  | 1.82660900  | -1.19103100 |
| C  | -2.05983400 | -3.01039100 | 0.52209500  | H  | 2.61952200  | 2.76357200  | -1.21746700 |
| H  | -1.63635300 | -3.76352200 | -0.13713400 | C  | -0.56341400 | 3.88927600  | -0.32233800 |
| Cl | 1.28559800  | -0.08058600 | 2.09216700  | H  | -1.26093400 | 3.75916200  | -1.14501000 |
|    |             |             |             | Cl | 0.27331600  | -0.60025000 | -2.18891700 |

#### TS1-Cl-(E)-exo

|   |             |             |             |          |             |             |             |
|---|-------------|-------------|-------------|----------|-------------|-------------|-------------|
| C | 0.96940800  | 0.63163600  | -0.84545000 | <b>4</b> |             |             |             |
| C | -1.60753100 | 0.61083700  | 0.83613800  | C        | 4.70691400  | 0.55587400  | 0.23285300  |
| C | 0.51942000  | -0.39840600 | 0.88299800  | C        | 4.81013500  | 1.94281900  | 0.30778400  |
| C | -1.46123100 | -1.71416700 | 0.28095900  | C        | 3.69017700  | 2.78848600  | 0.26519600  |
| C | -2.80741100 | -1.70648800 | -0.17177800 | C        | 2.41032100  | 2.24549600  | 0.16031100  |
| C | -0.67930800 | -2.90106600 | 0.28601000  | C        | 2.33990100  | 0.82308000  | 0.10420100  |
| C | -3.34459100 | -2.91610400 | -0.65350500 | C        | 3.44338600  | -0.05729100 | 0.11729600  |
| C | -1.26482700 | -4.06499700 | -0.22070600 | C        | 1.14813500  | 3.03010500  | 0.09718300  |
| C | -2.57983000 | -4.07066800 | -0.68736200 | C        | -0.09310000 | 2.35154100  | 0.02947900  |
| H | -4.36748100 | -2.94694300 | -1.00946600 | N        | -0.04936000 | 0.97168400  | 0.04206600  |
| H | -0.68934500 | -4.98250600 | -0.26177400 | C        | 1.08279500  | 0.21520100  | 0.05138100  |
| H | -3.00728700 | -4.99010500 | -1.07647000 | C        | -1.37195100 | 2.94862100  | -0.05685500 |
| C | -3.57880100 | -0.47003400 | -0.13209000 | C        | -2.56558300 | 2.07934200  | -0.14337300 |
| C | -4.90793600 | -0.35212700 | -0.58487100 | C        | -2.40384100 | 0.66112900  | -0.08593600 |
| C | -2.95446200 | 0.68288000  | 0.41442400  | C        | -1.10587100 | 0.15886700  | 0.00558600  |
| C | -5.58519500 | 0.85538700  | -0.49006000 | C        | -3.88101800 | 2.52978000  | -0.29715700 |
| H | -5.41759200 | -1.20651300 | -1.01577800 | C        | -4.93420400 | 1.61324100  | -0.39204900 |
| C | -3.66027100 | 1.90557500  | 0.51752800  | C        | -4.74023400 | 0.23033400  | -0.32569700 |
| C | -4.96287500 | 1.99046600  | 0.06449300  | C        | -3.44898500 | -0.28572500 | -0.15904700 |
| H | -6.60913200 | 0.92257000  | -0.84648100 | C        | 1.05879400  | 4.42770600  | 0.08751400  |

|   |             |             |             |   |             |             |             |
|---|-------------|-------------|-------------|---|-------------|-------------|-------------|
| C | -0.18487200 | 5.06543200  | 0.01077500  | C | -0.58190300 | -2.75313200 | 2.25155300  |
| C | -1.38146200 | 4.35351100  | -0.06334700 | C | -1.61596300 | -3.30979600 | 2.97549600  |
| C | 0.74932400  | -1.12215400 | -0.00343300 | C | -2.85795400 | -2.68172100 | 3.01994900  |
| N | -0.68706800 | -1.13894800 | 0.01953900  | C | -3.02796700 | -1.49694100 | 2.33499900  |
| C | 1.84853900  | -2.05364400 | -0.17117900 | C | -1.98926800 | -0.88071500 | 1.59774200  |
| C | 3.18445400  | -1.50085300 | -0.04642100 | C | 4.16312900  | -1.53654000 | 0.20028500  |
| C | -1.71706400 | -2.11588700 | 0.17901500  | C | 5.24437000  | -2.34958100 | 0.58293300  |
| C | -3.07761800 | -1.70096500 | 0.01576400  | C | 5.09130300  | -3.46294700 | 1.39077700  |
| C | 1.70794000  | -3.41020300 | -0.53155000 | C | 3.81332400  | -3.80428000 | 1.82969700  |
| C | 2.80707900  | -4.24107600 | -0.66802800 | C | 2.72615700  | -3.01249500 | 1.48877100  |
| C | 4.09555500  | -3.73700000 | -0.45414500 | H | -4.25712700 | 0.81816900  | 1.71928600  |
| C | 4.26907900  | -2.39327100 | -0.16831100 | H | -4.57033400 | 2.86339800  | 0.43543800  |
| C | -4.06544000 | -2.69729200 | 0.13530700  | H | -2.84274500 | 3.72346900  | -1.08117400 |
| C | -3.75350500 | -4.01112200 | 0.45070100  | H | -1.28777900 | 4.26692300  | -2.47885500 |
| C | -2.42544800 | -4.36679600 | 0.70287500  | H | 0.72459000  | 5.00640800  | -3.68609600 |
| C | -1.41544300 | -3.42148600 | 0.57619600  | H | 2.86770800  | 3.81812500  | -3.46379200 |
| H | 5.61631200  | -0.03297400 | 0.26351700  | H | 4.66976700  | 2.63483500  | -3.16422400 |
| H | 5.79588600  | 2.38918400  | 0.39663500  | H | 6.63279400  | 1.25798100  | -2.64648700 |
| H | 3.83947300  | 3.86175400  | 0.31917600  | H | 6.51046900  | -0.65075500 | -1.12207100 |
| H | -4.09952400 | 3.59055800  | -0.35393400 | H | 0.33363400  | -3.31009500 | 2.24211700  |
| H | -5.94369000 | 1.99182800  | -0.52036800 | H | -1.45395100 | -4.25065500 | 3.49214200  |
| H | -5.60142600 | -0.42340300 | -0.40273700 | H | -3.68534600 | -3.12022000 | 3.56858500  |
| H | 1.95796600  | 5.03238700  | 0.13543700  | H | -4.00640700 | -1.03326800 | 2.34666300  |
| H | -0.21756600 | 6.15036400  | 0.00581300  | H | 6.23670700  | -2.09515900 | 0.23072900  |
| H | -2.31865800 | 4.89587900  | -0.12391400 | H | 5.95280300  | -4.06272500 | 1.66540500  |
| H | 0.72570200  | -3.80491800 | -0.75358300 | H | 3.65306800  | -4.68773900 | 2.43928700  |
| H | 2.66416500  | -5.27893900 | -0.95265800 | H | 1.75881300  | -3.31302400 | 1.83085300  |
| H | 4.96057200  | -4.38646100 | -0.54460800 |   |             |             |             |
| H | 5.27913200  | -2.01500300 | -0.06107100 |   |             |             |             |
| H | -5.10634300 | -2.42322200 | 0.00588000  |   |             |             |             |
| H | -4.54481000 | -4.74856900 | 0.53796200  |   |             |             |             |
| H | -2.17562900 | -5.37624600 | 1.01357600  |   |             |             |             |
| H | -0.39788800 | -3.68616000 | 0.82631700  |   |             |             |             |

#### 4-TS

|   |             |             |             |
|---|-------------|-------------|-------------|
| C | -3.47439200 | 1.12347500  | 1.03577400  |
| C | -3.65057900 | 2.30032600  | 0.31010600  |
| C | -2.66690700 | 2.79018400  | -0.55735400 |
| C | -1.46518900 | 2.09794700  | -0.71345800 |
| C | -1.31808700 | 0.89226900  | 0.03107600  |
| C | -2.29017300 | 0.37181000  | 0.89935900  |
| C | -0.33487800 | 2.57354500  | -1.53781300 |
| C | 0.89669500  | 1.88875900  | -1.48325400 |
| N | 0.95014900  | 0.73419700  | -0.71332800 |
| C | -0.09503400 | 0.20179200  | -0.01077700 |
| C | 2.08801800  | 2.29006600  | -2.13691100 |
| C | 3.31895300  | 1.50250700  | -1.91299000 |
| C | 3.27439000  | 0.37154100  | -1.03885100 |
| C | 2.04391900  | 0.01554100  | -0.46401200 |
| C | -0.36850100 | 3.70342800  | -2.36346500 |
| C | 0.78129000  | 4.12611500  | -3.05358300 |
| C | 1.99712700  | 3.44581700  | -2.93572500 |
| C | 4.55994900  | 1.79660400  | -2.48553500 |
| C | 5.68051500  | 1.01196400  | -2.18665500 |
| C | 5.61099000  | -0.07803000 | -1.31291000 |
| C | 4.39232200  | -0.41878600 | -0.71554300 |
| C | 0.32970500  | -0.90494800 | 0.70841700  |
| N | 1.74955000  | -1.00936400 | 0.38786200  |
| C | 2.86209200  | -1.86530900 | 0.70568200  |
| C | -0.69285300 | -1.53897500 | 1.54387500  |
